# Supplementary material for: Integrative Pathway-Based Approach for Genome-Wide Association Studies: Identification of New Pathways for Rheumatoid Arthritis and Type 1 Diabetes
Source: PLoS One. 2013 Oct 25;8(10):e78577. doi: 10.1371/journal.pone.0078577 (PMC3808349; doi:10.1371/journal.pone.0078577)
Supplement: Table S4 — Best lists of the MIP analyses of type 1 diabetes. This excel file contains four spreadsheets presenting the results of our MIP analysis for type 1 diabetes (T1D): the best list of the analysis with all SNPs, the best list of the analysis using SNPs having a p-value ≤10−3, the best list of the analysis using SNPs having a p-value ≤10−4 and the best list of the analysis using SNPs having a p-value ≤10−5. (XLSX) [file pone.0078577.s005.xlsx]

## Sheet: All SNPs
Pathway	Analysis method	No of SNPs	P-value	PW Gene count	PW Enrichment p-value	Genes	SNPs
Allograft rejection	interaction, high	432	<=1.0E-06	34/39	4.297e-23	355, 940, 941, 942, 958, 959, 3002, 3105, 3106, 3107, 3108, 3109, 3111, 3112, 3113, 3115, 3117, 3118, 3119, 3122, 3126, 3127, 3133, 3134, 3135, 3558, 3565, 3586, 3592, 3593, 7124								rs1003199, rs10174652, rs10193976, rs1034325, rs1044429, rs10483286, rs10490573, rs1050391, rs10509561, rs1051336, rs1059174, rs1063320, rs1077433, rs10866712, rs10887911, rs10887918, rs10909625, rs11119447, rs11202972, rs11202989, rs11626395, rs11689629, rs11926233, rs11928737, rs12012220, rs12191230, rs12193110, rs12433772, rs1245218, rs12556784, rs12613538, rs12635350, rs1264563, rs12878495, r…
Antigen processing and presentation	pathway	566	<=1.0E-06	54/78	1.032e-26	567, 920, 925, 926, 972, 1385, 1508, 1514, 1520, 2923, 3105, 3106, 3107, 3108, 3109, 3111, 3112, 3113, 3115, 3117, 3118, 3119, 3122, 3126, 3127, 3133, 3134, 3135, 3304, 3305, 3306, 3308, 3312, 3320, 3326, 3458, 3805, 3806, 3809, 3821, 3824, 4261, 4800, 4801, 4802, 5641, 5721, 5993, 5994, 6890, 6891, 7124, 8302, 10437								rs10048076, rs1005834, rs10088415, rs10151495, rs10163054, rs10172070, rs10180144, rs1034325, rs1035263, rs1044043, rs1044429, rs10484565, rs10489167, rs10490596, rs10492201, rs10498516, rs1050391, rs10507174, rs1051336, rs1055141, rs1059174, rs1063320, rs10734826, rs10734827, rs1075835, rs1075836, rs1075838, rs10772285, rs1077433, rs10774450, rs10784640, rs10784663, rs10784688, rs10845089, rs108…
Asthma	interaction, high	194	<=1.0E-06	27/31	1.486e-18	958, 959, 2205, 2206, 2207, 3108, 3109, 3111, 3112, 3113, 3115, 3117, 3118, 3119, 3122, 3126, 3127, 3562, 3565, 3578, 3586, 3596, 5553, 6037, 6356, 7124								rs1044429, rs10489849, rs1050391, rs1051336, rs10896615, rs11119447, rs11230161, rs12012220, rs12119226, rs12135788, rs12191230, rs12556784, rs12656759, rs1303621, rs1367731, rs1431403, rs151719, rs154982, rs1554286, rs1569723, rs16870880, rs16969449, rs16969457, rs17132324, rs17169344, rs17169348, rs17254457, rs17330906, rs175737, rs176248, rs17666424, rs1799964, rs181781, rs188245, rs1883834, r…
Autoimmune thyroid disease	interaction, high	480	<=1.0E-06	47/54	2.088e-31	355, 940, 941, 942, 958, 959, 1081, 1493, 3002, 3105, 3106, 3107, 3108, 3109, 3111, 3112, 3113, 3115, 3117, 3118, 3119, 3122, 3126, 3127, 3133, 3134, 3135, 3439, 3440, 3441, 3442, 3443, 3444, 3445, 3447, 3448, 3449, 3451, 3452, 3558, 3565, 3586, 7252, 7253								rs10083503, rs10116540, rs10116615, rs10119678, rs10142999, rs10149689, rs10174652, rs10179639, rs10193976, rs1034325, rs1044429, rs10483286, rs10490573, rs1050391, rs10509561, rs1051336, rs1059174, rs1063320, rs10757219, rs1077433, rs10811497, rs10811519, rs10811523, rs10811525, rs10811527, rs10887911, rs10887918, rs10909625, rs10964878, rs10964882, rs10964930, rs10964981, rs10964985, rs11119447…
Cell adhesion molecules (CAMs)	interaction, high	3362	<=1.0E-06	98/136	5.351e-50	214, 914, 920, 925, 926, 933, 940, 941, 942, 947, 958, 959, 965, 1272, 1364, 1365, 1462, 1493, 3105, 3106, 3107, 3108, 3109, 3111, 3112, 3113, 3115, 3117, 3118, 3119, 3122, 3126, 3127, 3133, 3134, 3135, 3655, 3676, 3680, 3683, 3684, 4099, 4267, 4359, 4684, 4685, 4756, 4897, 5010, 5175, 5788, 5792, 5797, 5818, 5819, 6401, 6402, 6403, 6404, 6614, 6693, 6900, 7412, 9019, 9071, 9073, 9074, 9075, 9076…								rs1000625, rs1001162, rs1002715, rs10045126, rs10047413, rs10049325, rs1005388, rs1005834, rs10059489, rs1006826, rs1006832, rs1006833, rs1007304, rs1007369, rs1007530, rs10081247, rs10082977, rs1008434, rs10084595, rs10085952, rs1009897, rs10099072, rs10110591, rs10114060, rs10118693, rs10121158, rs10122089, rs10122509, rs10127961, rs1013416, rs1015020, rs1015665, rs1015932, rs1016188, rs1016930…
Complement and coagulation cascades	interaction, high	504	<=1.0E-06	47/69	5.945e-23	2, 462, 623, 624, 629, 710, 716, 717, 718, 719, 722, 725, 727, 728, 966, 1361, 1378, 1380, 1604, 2147, 2149, 2152, 2158, 2159, 2160, 2162, 2165, 2243, 2244, 2266, 3053, 3075, 3818, 3827, 4153, 5054, 5104, 5265, 5327, 5329, 5340, 5345, 5624								rs10005645, rs10014507, rs10116271, rs10132489, rs10136006, rs10137303, rs10138182, rs10140368, rs10142830, rs10144552, rs10147171, rs10149714, rs1016686, rs10429953, rs1044291, rs10454254, rs10484047, rs10484323, rs10493874, rs10494890, rs10517602, rs1055369, rs10733086, rs10733650, rs10737680, rs10739585, rs10743598, rs10746450, rs10746451, rs1074801, rs10754209, rs10760135, rs1076758, rs107793…
Dorso-ventral axis formation	pathway	621	<=1.0E-06	22/25	1.571e-15	1956, 2113, 2114, 2120, 2885, 3845, 4851, 4853, 4854, 4855, 5594, 5604, 6654, 6655, 9271, 51513, 56776, 56907, 64506, 84501, 143689, 440822								rs1002508, rs1009951, rs1009953, rs1011185, rs10127888, rs10145260, rs10157105, rs1015714, rs1016295, rs10204958, rs10244108, rs10256393, rs1026417, rs1037666, rs1038098, rs10400906, rs10403708, rs10408719, rs10483600, rs10488140, rs10488142, rs10491990, rs10495466, rs10505975, rs10505980, rs1051420, rs10737842, rs10741493, rs10743972, rs10743973, rs10744455, rs10750388, rs10754696, rs10754697, r…
ECM-receptor interaction	interaction, high	629	<=1.0E-06	64/85	5.562e-35	948, 961, 1291, 1292, 1293, 1605, 2335, 2811, 2814, 3161, 3371, 3381, 3655, 3672, 3673, 3675, 3676, 3678, 3679, 3680, 6696, 7143, 7148, 7448, 8515, 22801, 51206, 63923, 131873								rs10030625, rs1004395, rs10057067, rs10120598, rs10121268, rs1015260, rs1016815, rs10170582, rs10172321, rs10172425, rs10178599, rs10194251, rs10199059, rs10201850, rs10202483, rs10205700, rs10209954, rs1038034, rs10432530, rs1047481, rs10489310, rs10489311, rs10489312, rs10489316, rs10489318, rs10489321, rs10489322, rs10489323, rs10498037, rs10498039, rs1050088, rs10510690, rs10510691, rs1051300…
Endocytosis	pathway	4107	<=1.0E-06	174/204	9.836e-111	153, 154, 157, 160, 161, 163, 382, 408, 409, 857, 858, 859, 867, 868, 998, 1175, 1211, 1213, 1234, 1436, 1601, 1759, 1785, 1950, 1956, 2060, 2065, 2066, 2149, 2263, 2264, 2321, 2348, 2352, 2868, 2869, 2870, 3105, 3106, 3107, 3133, 3134, 3135, 3304, 3305, 3306, 3312, 3480, 3559, 3560, 3577, 3579, 3791, 3815, 3949, 4087, 4088, 4091, 4092, 4193, 4233, 4734, 4914, 5156, 5337, 5338, 5371, 5584, 5590, …								rs10010791, rs10015901, rs10017069, rs1002084, rs10022638, rs1002774, rs10028563, rs10029654, rs10031547, rs10043361, rs1004765, rs10048945, rs10050046, rs10054686, rs10055860, rs10055946, rs10061228, rs1006286, rs1006387, rs10066266, rs10066459, rs1007007, rs10073538, rs10075995, rs10076961, rs10078637, rs10081624, rs10086340, rs10086454, rs1008673, rs10087450, rs10093238, rs10095479, rs10095820…
Epstein-Barr virus infection	interaction, high	1763	<=1.0E-06	89/204	8.467e-13	207, 208, 596, 683, 952, 953, 956, 958, 965, 983, 1017, 1147, 1380, 1432, 1457, 1459, 2208, 2268, 2932, 3066, 3105, 3106, 3107, 3113, 3115, 3117, 3118, 3119, 3122, 3126, 3127, 3133, 3134, 3135, 3304, 3551, 3586, 3587, 3588, 3654, 3683, 3716, 3718, 4067, 4790, 4792, 4793, 5295, 5335, 5336, 5567, 5568, 5599, 5601, 5602, 5603, 5606, 5608, 5610, 5613, 5714, 5757, 6416, 6693, 6774, 6850, 6885, 7128, 7…								rs10001480, rs10016073, rs10019008, rs10024003, rs10026060, rs10029339, rs10033283, rs10037187, rs10040640, rs10043473, rs10056163, rs10064315, rs10070943, rs10071585, rs10075612, rs10078240, rs10089762, rs10100561, rs1011170, rs10114465, rs10114624, rs10118357, rs10132268, rs1013996, rs1014573, rs10147603, rs1016379, rs10164912, rs10166046, rs10167875, rs10168639, rs10177619, rs10184747, rs10185…
Focal adhesion	interaction, high	2445	<=1.0E-06	168/200	1.174e-104	81, 87, 88, 89, 207, 208, 330, 331, 572, 596, 673, 857, 858, 859, 998, 1291, 1292, 1293, 1398, 1399, 1956, 2064, 2321, 2324, 2335, 2534, 2885, 2909, 2932, 3082, 3371, 3381, 3479, 3480, 3611, 3655, 3672, 3673, 3675, 3676, 3678, 3679, 3680, 3791, 4638, 4659, 5058, 5062, 5063, 5155, 5156, 5159, 5228, 5295, 5594, 5599, 5601, 5602, 5604, 5728, 5923, 6093, 6696, 6714, 7094, 7143, 7148, 7409, 7410, 7422…								rs10001480, rs1000515, rs10006293, rs10006747, rs10017970, rs10023994, rs10024003, rs10026060, rs10027875, rs10029166, rs10029339, rs10030625, rs10033283, rs10033375, rs10037187, rs10040640, rs10043473, rs1004395, rs1004725, rs10050046, rs10056163, rs10057067, rs10064315, rs10070943, rs10071585, rs10075612, rs1007662, rs10078240, rs10082812, rs10085109, rs1009145, rs1011851, rs10119727, rs1012059…
Graft-versus-host disease	interaction, high	448	<=1.0E-06	32/43	6.942e-18	355, 940, 941, 942, 3002, 3105, 3106, 3107, 3108, 3109, 3111, 3112, 3113, 3115, 3117, 3118, 3119, 3122, 3126, 3127, 3133, 3134, 3135, 3552, 3553, 3558, 3569, 3821, 3824, 7124								rs10174652, rs10193976, rs10255691, rs10263896, rs1034325, rs1044429, rs10483286, rs10490573, rs10499563, rs1050391, rs10509561, rs1051336, rs1059174, rs1063320, rs10734826, rs10734827, rs10772285, rs1077433, rs10845089, rs10887911, rs10887918, rs10909625, rs10950917, rs10950919, rs11053712, rs11053720, rs11053751, rs11053839, rs11202972, rs11202989, rs1122913, rs11626395, rs11677416, rs11680809,…
Hematopoietic cell lineage	interaction, high	912	<=1.0E-06	66/88	7.45e-36	909, 910, 912, 913, 914, 915, 916, 920, 925, 926, 929, 931, 933, 945, 947, 948, 952, 966, 1378, 1380, 1435, 1436, 1440, 1441, 1604, 2056, 2057, 2208, 2322, 2811, 2814, 2993, 3122, 3126, 3127, 3552, 3553, 3554, 3559, 3562, 3565, 3566, 3568, 3569, 3570, 3574, 3575, 3655, 3672, 3673, 3675, 3676, 3678, 3684, 3815, 4254, 4311, 7037, 7066, 7124, 7850								rs10016073, rs10019008, rs1002655, rs1002656, rs10029931, rs10044838, rs10053847, rs10057067, rs1005834, rs10093522, rs1009897, rs1010101, rs10106730, rs1015260, rs10205700, rs10217110, rs1025039, rs1025192, rs10255691, rs10263896, rs1038034, rs10412123, rs10419722, rs10429953, rs10434440, rs1047481, rs10488968, rs10491434, rs10494190, rs10499563, rs10504684, rs10504696, rs10504705, rs10504706, r…
Herpes simplex infection	interaction, high	1325	<=1.0E-06	99/188	5.335e-21	355, 718, 727, 972, 983, 1017, 1147, 1457, 1459, 1616, 2969, 3105, 3106, 3107, 3108, 3109, 3111, 3112, 3113, 3115, 3117, 3118, 3119, 3122, 3126, 3127, 3133, 3134, 3135, 3150, 3439, 3440, 3441, 3442, 3443, 3444, 3445, 3447, 3448, 3449, 3451, 3452, 3454, 3455, 3456, 3459, 3460, 3551, 3553, 3569, 3592, 3593, 3716, 3717, 4615, 4790, 4792, 4793, 5599, 5601, 5602, 5610, 5781, 5818, 5819, 6041, 6347, 63…								rs10001480, rs10024003, rs10026060, rs10029339, rs1003199, rs10033283, rs1007369, rs1007530, rs1011170, rs10116271, rs10116352, rs10116540, rs10116615, rs10118357, rs10119004, rs10119678, rs10132268, rs1014573, rs10147603, rs1015249, rs10199181, rs1020322, rs1024467, rs10255691, rs10263017, rs10263896, rs10276962, rs1028593, rs1034325, rs10400584, rs1040817, rs1040818, rs1044429, rs10444338, rs10…
HTLV-I infection	interaction, high	1487	<=1.0E-06	89/268	3.12e-06	207, 208, 331, 598, 701, 915, 916, 958, 1019, 1031, 1111, 1147, 1739, 2932, 3105, 3106, 3107, 3108, 3109, 3111, 3112, 3113, 3115, 3117, 3118, 3119, 3122, 3126, 3127, 3133, 3134, 3135, 3551, 3554, 3558, 3559, 3560, 3569, 3683, 3716, 3718, 3932, 4055, 4214, 4215, 4790, 4792, 5155, 5156, 5159, 5295, 5423, 5424, 5567, 5568, 5599, 5601, 5602, 5613, 6416, 6776, 6777, 7015, 7046, 7048, 7094, 7124, 7157,…								rs10001480, rs10018583, rs10024003, rs10026060, rs10028496, rs10029339, rs10032067, rs10033283, rs10037187, rs10037963, rs10040640, rs10043473, rs10051671, rs10056163, rs10064315, rs10070943, rs10071585, rs10075612, rs10078240, rs10086541, rs10093594, rs10098453, rs10132268, rs10147603, rs1016379, rs10167875, rs1017226, rs10178648, rs1019855, rs10218421, rs1024217, rs10255691, rs10263896, rs10285…
Influenza A	interaction, high	1196	<=1.0E-06	135/176	1.915e-74	207, 208, 355, 1432, 2932, 3108, 3109, 3111, 3112, 3113, 3115, 3117, 3118, 3119, 3122, 3126, 3127, 3304, 3439, 3440, 3441, 3442, 3443, 3444, 3445, 3447, 3448, 3449, 3451, 3452, 3454, 3455, 3456, 3459, 3460, 3551, 3552, 3553, 3569, 3576, 3592, 3593, 3606, 3716, 3717, 4615, 4790, 4792, 4793, 5295, 5340, 5594, 5599, 5601, 5602, 5603, 5604, 5606, 5608, 5610, 5644, 5645, 5646, 6041, 6347, 6352, 6416, …								rs10001480, rs10024003, rs10026060, rs10029339, rs1003199, rs10033283, rs10037187, rs10040640, rs10043473, rs10056163, rs10064315, rs10070943, rs10071585, rs10075612, rs10078240, rs10102276, rs10111172, rs10116352, rs10116540, rs10116615, rs10119004, rs10119678, rs10132268, rs1013996, rs10147603, rs10167875, rs10199181, rs10231513, rs10255691, rs10263017, rs10263896, rs10276962, rs1028593, rs1043…
Intestinal immune network for IgA production	interaction, high	582	<=1.0E-06	38/49	4.286e-22	608, 940, 941, 942, 958, 959, 3108, 3109, 3111, 3112, 3113, 3115, 3117, 3118, 3119, 3122, 3126, 3127, 3558, 3565, 3569, 3586, 3676, 4055, 5284, 6387, 7852, 9020, 10673, 10803, 23308, 23495, 29851, 56477, 57379								rs1002084, rs10160186, rs10172481, rs10174652, rs10180136, rs10180515, rs10180781, rs10193976, rs10197133, rs10199153, rs10202310, rs10205700, rs10255691, rs10263896, rs1038034, rs1044429, rs10490573, rs10496744, rs10499563, rs1050391, rs10508881, rs10508882, rs10508884, rs1051336, rs10770847, rs10770856, rs10793513, rs10793514, rs10805674, rs10841875, rs10899957, rs10899964, rs10900040, rs109000…
Legionellosis	pathway	461	<=1.0E-06	48/55	3.509e-25	317, 375, 664, 718, 834, 836, 840, 841, 842, 929, 1195, 1378, 1915, 1917, 1937, 2919, 2920, 3297, 3304, 3305, 3306, 3312, 3329, 3553, 3569, 3576, 3592, 3593, 3606, 3684, 3689, 4615, 4790, 4792, 5861, 5970, 7097, 7099, 7100, 7124, 7415, 9554, 10767, 23786, 51128, 54205, 56681, 58484								rs1003199, rs1007573, rs10132268, rs10139376, rs10139469, rs1014021, rs10147603, rs10148758, rs10151495, rs10173422, rs10173678, rs10255691, rs10263896, rs10276962, rs1028593, rs10429953, rs1046747, rs10483336, rs10483341, rs10498516, rs10499563, rs10509984, rs1072035, rs10762340, rs10779340, rs10787498, rs1080199, rs10866712, rs10872428, rs10910746, rs10950917, rs10950919, rs10972300, rs10983657…
Leishmaniasis	interaction, high	762	<=1.0E-06	57/73	8.717e-33	718, 1378, 1432, 1535, 2212, 3108, 3109, 3111, 3112, 3113, 3115, 3117, 3118, 3119, 3122, 3126, 3127, 3459, 3460, 3552, 3553, 3565, 3586, 3592, 3593, 3654, 3676, 3684, 3716, 3717, 4615, 4689, 4790, 4792, 4793, 5594, 5603, 6772, 6885, 7097, 7099, 7124, 51135								rs1003199, rs1011170, rs10116352, rs10119004, rs10132268, rs1014573, rs10147603, rs10199181, rs1020322, rs10205700, rs1028593, rs1038034, rs1040817, rs1040818, rs10429953, rs1044429, rs10455175, rs10485365, rs10485371, rs10485404, rs10494355, rs10498972, rs10498974, rs10498977, rs10498978, rs10498982, rs1050391, rs1051336, rs10758666, rs10779340, rs10806443, rs10806445, rs10815101, rs10815110, rs…
MAPK signaling pathway	pathway	6202	<=1.0E-06	227/268	2.142e-143	207, 208, 355, 356, 408, 409, 468, 627, 673, 773, 774, 775, 776, 777, 779, 781, 782, 783, 784, 785, 786, 836, 929, 994, 998, 1147, 1326, 1386, 1398, 1399, 1432, 1616, 1647, 1843, 1844, 1845, 1846, 1847, 1848, 1849, 1852, 1950, 1956, 2005, 2122, 2246, 2247, 2248, 2249, 2250, 2251, 2252, 2253, 2254, 2255, 2257, 2258, 2259, 2260, 2263, 2264, 2317, 2318, 2353, 2768, 2885, 3304, 3305, 3306, 3312, 3315…								rs1000014, rs10001480, rs10005711, rs10008908, rs10011041, rs10011799, rs10011961, rs10016149, rs10016658, rs10017696, rs10021604, rs10022176, rs1002261, rs10024003, rs10025071, rs10025495, rs10025560, rs10026060, rs10027110, rs10029339, rs10029654, rs10030362, rs10031159, rs10031882, rs10033283, rs1003642, rs1003738, rs10037963, rs10045029, rs1004720, rs10049174, rs10049776, rs10050099, rs100516…
Measles	pathway	2022	<=1.0E-06	118/134	1.311e-78	103, 207, 208, 355, 356, 595, 868, 894, 896, 898, 915, 916, 940, 1017, 1019, 1021, 1027, 1147, 1457, 1459, 1796, 2534, 2932, 3304, 3305, 3306, 3312, 3439, 3440, 3441, 3442, 3443, 3444, 3445, 3447, 3448, 3449, 3451, 3452, 3454, 3455, 3456, 3458, 3459, 3460, 3552, 3553, 3558, 3559, 3560, 3565, 3569, 3592, 3593, 3596, 3654, 3716, 3717, 3718, 4068, 4478, 4599, 4615, 4790, 4792, 4793, 4938, 4939, 4940…								rs1003199, rs10037187, rs1003827, rs10040640, rs1004112, rs10043473, rs10056163, rs10064315, rs10070943, rs10071585, rs10075612, rs10078240, rs10090183, rs10100472, rs10102276, rs10111172, rs1011170, rs10116352, rs10116540, rs10116615, rs10119004, rs10119678, rs10132268, rs1014573, rs10147603, rs10151495, rs10156225, rs10168354, rs10174652, rs10193976, rs10194748, rs10199181, rs1020322, rs1020348…
Natural killer cell mediated cytotoxicity	interaction, high	1154	<=1.0E-06	108/137	6.856e-62	355, 637, 673, 919, 962, 2207, 2534, 2885, 3002, 3105, 3106, 3107, 3133, 3135, 3439, 3440, 3441, 3442, 3443, 3444, 3445, 3447, 3448, 3449, 3451, 3452, 3454, 3455, 3456, 3459, 3460, 3683, 3805, 3806, 3809, 3821, 3824, 3932, 3937, 4068, 4277, 5058, 5295, 5335, 5336, 5594, 5604, 5781, 6452, 6850, 7124, 7409, 7410, 7535, 8503, 8743, 8793, 8794, 8795, 8797, 9436, 10451, 22914, 23533, 25759, 27040, 517…								rs10037187, rs10040640, rs10043473, rs10050695, rs10056163, rs10064315, rs10068619, rs10070943, rs10071585, rs10075612, rs1007662, rs10078240, rs10102276, rs10111172, rs10114465, rs10114624, rs10116540, rs10116615, rs10119678, rs10119727, rs1015249, rs1022649, rs10244133, rs1024467, rs10281173, rs1034325, rs10400584, rs10443202, rs10457852, rs10483286, rs10487888, rs10494071, rs10494080, rs104940…
Notch signaling pathway	pathway	619	<=1.0E-06	36/47	1.115e-20	182, 1387, 1487, 1488, 1840, 1857, 2033, 3066, 3280, 3516, 3714, 3955, 4242, 4851, 4853, 4854, 4855, 5663, 5664, 5986, 6868, 8650, 8850, 9253, 9541, 9612, 9794, 11317, 22938, 23220, 23385, 28514, 54567, 55534, 84441, 171558								rs10008046, rs10021952, rs10024138, rs10033468, rs1007748, rs10127888, rs10137465, rs10140990, rs10141031, rs10162414, rs10179642, rs10220356, rs1022431, rs10240036, rs1033517, rs1033611, rs1039948, rs10403708, rs10408719, rs10437580, rs10485741, rs10485749, rs10495250, rs10495563, rs10501376, rs10501835, rs10501838, rs10501845, rs10501846, rs10501847, rs10734174, rs10744793, rs10765791, rs107657…
Phagosome	interaction, high	823	<=1.0E-06	89/156	2.261e-33	537, 718, 929, 948, 949, 1535, 1783, 2204, 2212, 3105, 3106, 3107, 3108, 3109, 3111, 3112, 3113, 3115, 3117, 3118, 3119, 3122, 3126, 3127, 3133, 3134, 3135, 3673, 3678, 3684, 3920, 4074, 4153, 4689, 4973, 6441, 7037, 7097, 7099, 7278, 10332, 10952, 22925, 23480, 29927, 30835, 51143, 51606, 53407, 55176, 64581, 78989, 81035								rs1000579, rs10009773, rs10017573, rs1006487, rs1009438, rs10113505, rs10115446, rs10121003, rs10196882, rs10210631, rs10212131, rs10215617, rs10238349, rs10244229, rs1030656, rs1034325, rs1044429, rs10492522, rs10494355, rs1050391, rs1051336, rs10516164, rs10516165, rs1053403, rs1059174, rs1063320, rs10760689, rs10773111, rs1077433, rs1078066, rs10788338, rs10819684, rs10824381, rs10824779, rs10…
Protein digestion and absorption	interaction, ultra	221	<=1.0E-06	52/81	2.055e-23	486, 1291, 1292, 1293, 1357, 1358, 1359, 1360, 1361, 1504, 2006, 3783, 4311, 6519, 6520, 8645, 10008, 59272, 131873, 340024, 643834								rs10060236, rs10170582, rs10172321, rs10178599, rs10194161, rs10194251, rs1025192, rs10263705, rs10456468, rs10513338, rs10513468, rs10513469, rs1059502, rs10793085, rs10803657, rs10808242, rs10898989, rs10929217, rs11089042, rs11133652, rs11133684, rs1114097, rs11216567, rs11230633, rs11236119, rs11602340, rs11673595, rs11690358, rs11712763, rs11883572, rs11919465, rs11919702, rs11923817, rs1192…
Protein processing in endoplasmic reticulum	pathway	2713	<=1.0E-06	139/167	1.637e-85	267, 468, 573, 578, 596, 823, 824, 1409, 1603, 1650, 2081, 2923, 3300, 3301, 3304, 3305, 3306, 3312, 3320, 3326, 3337, 3703, 3998, 4121, 4217, 4287, 4780, 5071, 5599, 5601, 5602, 5610, 5611, 5887, 6184, 6185, 6238, 6396, 6400, 6500, 6745, 6746, 6747, 7095, 7184, 7186, 7321, 7322, 7323, 7324, 7325, 7326, 7327, 7353, 7415, 7466, 7494, 7841, 7991, 8454, 8720, 9373, 9451, 9532, 9601, 9632, 9695, 9709…								rs10001480, rs1001143, rs10012946, rs10014331, rs10024003, rs10026060, rs10029339, rs10033283, rs10041986, rs10044736, rs10074461, rs10075893, rs10077796, rs1008676, rs10091071, rs10094191, rs10094375, rs10098376, rs10103753, rs10106008, rs10109908, rs10115446, rs10116424, rs10117160, rs1011969, rs10121003, rs1012424, rs10125432, rs10129518, rs10130398, rs10130478, rs10130648, rs1013140, rs101314…
Rheumatoid arthritis	interaction, high	739	<=1.0E-06	58/92	2.362e-25	537, 940, 941, 942, 1435, 1493, 2321, 2919, 3108, 3109, 3111, 3112, 3113, 3115, 3117, 3118, 3119, 3122, 3126, 3127, 3552, 3553, 3569, 3576, 3605, 3606, 3683, 4312, 4314, 5228, 6347, 6348, 6352, 6364, 6372, 6374, 6387, 7010, 7097, 7099, 7124, 7422, 8600, 8792, 10673, 51561, 51606								rs10113505, rs10160186, rs10174652, rs10179639, rs10193976, rs10208046, rs1022926, rs10255691, rs10263896, rs1034375, rs1044429, rs10484879, rs10484881, rs10490573, rs10499563, rs1050391, rs10507507, rs10507513, rs10507514, rs10507516, rs10508881, rs10508882, rs10508884, rs10511803, rs10511804, rs1051336, rs1065341, rs10738763, rs10793513, rs10793514, rs10812540, rs10812541, rs10899957, rs1089996…
Spliceosome	pathway	769	<=1.0E-06	104/128	4.456e-62	988, 1655, 1659, 1665, 3183, 3192, 3304, 3305, 3306, 3312, 4670, 4686, 5093, 5356, 6428, 6429, 6430, 6431, 6432, 6434, 6625, 6626, 6627, 6628, 6629, 6631, 6635, 6636, 6637, 7307, 7919, 8175, 8449, 8559, 8683, 9128, 9129, 9343, 9410, 9416, 9716, 9775, 9785, 9879, 9939, 9984, 10262, 10285, 10286, 10291, 10450, 10465, 10523, 10569, 10594, 10713, 10907, 10915, 10929, 10946, 10992, 11017, 11157, 11325…								rs10003100, rs10004694, rs10017599, rs1004651, rs10066923, rs10075143, rs1008405, rs10085904, rs10136056, rs10151495, rs10158481, rs10177590, rs10184702, rs10197209, rs10198127, rs10202611, rs10226019, rs10229071, rs10232053, rs10249457, rs10251316, rs1046988, rs10483251, rs10489161, rs10494848, rs10498516, rs10498532, rs1050257, rs10508463, rs10508464, rs10508465, rs10514810, rs10515569, rs10540…
Staphylococcus aureus infection	interaction, high	312	<=1.0E-06	34/56	9.746e-15	629, 716, 717, 718, 719, 727, 728, 2204, 2212, 2266, 2357, 2359, 3075, 3108, 3109, 3111, 3112, 3113, 3115, 3117, 3118, 3119, 3122, 3126, 3127, 3586, 3683, 3684, 4153, 5340, 5724, 6403, 6404								rs10014507, rs10116271, rs10423494, rs10424234, rs1044429, rs10494355, rs1050391, rs1051336, rs10517602, rs10733086, rs10733650, rs10737680, rs10739585, rs1074801, rs10760135, rs10800462, rs10801555, rs10824381, rs10824779, rs10824784, rs10846450, rs10853782, rs10857277, rs10919203, rs10985112, rs10985126, rs10985127, rs11002340, rs11003040, rs11003084, rs11003114, rs11057118, rs11057119, rs11057…
Systemic lupus erythematosus	interaction, high	777	<=1.0E-06	52/138	7.807e-11	81, 87, 88, 89, 716, 717, 718, 727, 940, 941, 942, 958, 959, 1511, 2212, 2903, 2904, 3108, 3109, 3111, 3112, 3113, 3115, 3117, 3118, 3119, 3122, 3126, 3127, 3586, 6738, 7124, 8332, 8335, 8344, 8347, 8353, 8355, 8358, 8360, 8364, 8365, 8367, 8968, 286436, 440093								rs1005549, rs1009145, rs10116271, rs1012586, rs1013548, rs10141794, rs10174652, rs10193976, rs10431898, rs1044429, rs10466853, rs10484434, rs10484435, rs10490573, rs10492127, rs10492132, rs10492134, rs10492136, rs10492141, rs10492142, rs10494355, rs10500370, rs10500373, rs1050391, rs10506080, rs1051336, rs10518151, rs1070476, rs1070484, rs1070548, rs1071504, rs10733650, rs10734865, rs10739585, rs…
Tight junction	interaction, medium	2528	<=1.0E-06	91/133	1.815e-43	81, 87, 88, 89, 207, 208, 998, 1019, 1364, 1365, 1457, 1459, 2017, 2770, 2771, 2773, 3059, 3845, 3993, 4301, 4620, 4633, 4893, 5010, 5515, 5518, 5519, 5520, 5521, 5522, 5578, 5579, 5580, 5581, 5582, 5583, 5584, 5588, 5590, 5728, 5865, 6709, 6714, 7082, 7525, 8189, 8573, 8777, 9071, 9073, 9074, 9075, 9076, 9223, 9414, 9863, 10000, 10207, 10627, 10686, 22800, 22808, 23562, 26285, 29895, 50848, 5120…								rs1001162, rs1001877, rs10037715, rs10056782, rs10061370, rs10076854, rs1008434, rs10085711, rs10085952, rs1008974, rs1008975, rs1009145, rs10099072, rs1010544, rs10110591, rs1011185, rs10115052, rs1011531, rs10121700, rs10122431, rs10122932, rs10127438, rs1013316, rs10134093, rs1013571, rs10141794, rs1014632, rs1014797, rs10159479, rs1016553, rs10166692, rs10167883, rs1016930, rs10179954, rs1018…
Toll-like receptor signaling pathway	characteristic interaction, high	2	<=1.0E-06	85/102	1.144e-52	3663, 51311								rs3807306, rs5979785
Toxoplasmosis	interaction, high	1558	<=1.0E-06	115/133	1.154e-74	207, 208, 330, 331, 572, 596, 598, 958, 959, 1147, 1234, 1432, 3108, 3109, 3111, 3112, 3113, 3115, 3117, 3118, 3119, 3122, 3126, 3127, 3304, 3459, 3460, 3551, 3586, 3587, 3588, 3592, 3593, 3654, 3655, 3716, 3717, 4615, 4790, 4792, 4793, 5295, 5319, 5320, 5321, 5322, 5594, 5599, 5601, 5602, 5603, 5606, 5608, 6772, 6774, 6885, 7097, 7099, 7124, 7297, 8398, 8503, 8651, 8681, 10000, 23533, 26279, 308…								rs10001480, rs10024003, rs10026060, rs10029339, rs1003199, rs10033283, rs10037187, rs10040640, rs10043473, rs10056163, rs10064315, rs10070943, rs10071585, rs10075612, rs10078240, rs1011170, rs10116352, rs10119004, rs10132268, rs1013996, rs1014573, rs10147603, rs1018378, rs10199181, rs1020322, rs1026916, rs10276962, rs1028593, rs1032213, rs1040817, rs1040818, rs1044429, rs10455175, rs10465592, rs1…
Tuberculosis	interaction, high	1178	<=1.0E-06	138/182	6.174e-75	207, 208, 537, 572, 596, 637, 718, 805, 815, 816, 817, 818, 820, 929, 972, 1263, 1378, 1432, 1509, 2207, 2212, 3108, 3109, 3111, 3112, 3113, 3115, 3117, 3118, 3119, 3122, 3126, 3127, 3439, 3440, 3441, 3442, 3443, 3444, 3445, 3447, 3448, 3449, 3451, 3452, 3456, 3459, 3460, 3552, 3553, 3569, 3586, 3587, 3588, 3592, 3593, 3606, 3654, 3656, 3684, 3687, 3716, 3717, 3920, 3929, 4046, 4615, 4790, 5594, …								rs10000775, rs10001480, rs10005635, rs10009286, rs10012684, rs10015062, rs10015110, rs10023113, rs10024003, rs10026060, rs10029339, rs10031040, rs1003199, rs10033283, rs10050608, rs10066581, rs10087008, rs10103760, rs10106118, rs10113505, rs10114465, rs10114624, rs10116352, rs10116540, rs10116615, rs10119004, rs10119678, rs1012116, rs10153674, rs10172635, rs10196882, rs10199181, rs10255691, rs102…
Tumor viruses and cancer	interaction, high	1277	<=1.0E-06	70/207	1.541e-05	81, 87, 88, 89, 572, 718, 983, 998, 1017, 1019, 1021, 1111, 1232, 1233, 1234, 1237, 1739, 2885, 3066, 3105, 3106, 3107, 3133, 3134, 3135, 3249, 3572, 3716, 3718, 4055, 4067, 4790, 4792, 5295, 5366, 5423, 5567, 5568, 5594, 5610, 5613, 6714, 6774, 6776, 6777, 6850, 7157, 7185, 8344, 8347, 8360, 8364, 8365, 8367, 8379, 8503, 8850, 9261, 9734, 9759, 10014, 11317, 23513, 23533, 51564, 55697, 55869, 79…								rs1002169, rs1002170, rs10037187, rs1003827, rs10040640, rs10043473, rs10044080, rs10045084, rs10056163, rs10059243, rs10064315, rs10070943, rs10071585, rs10075612, rs10078240, rs10089762, rs1009145, rs10100561, rs10114465, rs10114624, rs10118357, rs10132268, rs10141794, rs1014638, rs10147603, rs1016379, rs10164912, rs10168639, rs10177619, rs10184747, rs10185293, rs10186131, rs10202774, rs1020706…
Type I diabetes mellitus	interaction, high	601	<=1.0E-06	35/45	1.587e-20	355, 940, 941, 942, 1363, 3002, 3105, 3106, 3107, 3108, 3109, 3111, 3112, 3113, 3115, 3117, 3118, 3119, 3122, 3126, 3127, 3133, 3134, 3135, 3552, 3553, 3558, 3592, 3593, 5798, 5799, 7124								rs1003199, rs10050033, rs10081235, rs10174652, rs10193976, rs10226480, rs10229605, rs10229712, rs10231253, rs10232468, rs10233396, rs10237947, rs10244830, rs10246948, rs1024718, rs10251462, rs10253045, rs10254965, rs10257910, rs10258710, rs10262458, rs10263303, rs10265417, rs10265651, rs10266729, rs1034325, rs1036373, rs10434933, rs1044429, rs10483286, rs10490573, rs1050391, rs10509561, rs1051336…
Viral myocarditis	interaction, high	495	<=1.0E-06	52/72	3.441e-27	25, 27, 637, 857, 940, 941, 942, 958, 959, 1525, 1604, 1605, 2534, 3105, 3106, 3107, 3108, 3109, 3111, 3112, 3113, 3115, 3117, 3118, 3119, 3122, 3126, 3127, 3133, 3134, 3135, 3683, 6442, 54205								rs10174652, rs10193976, rs1022649, rs10227696, rs10276962, rs1034325, rs1044429, rs10490573, rs1049334, rs1050088, rs1050391, rs1051336, rs1059174, rs1063320, rs10746450, rs10746451, rs1077433, rs10793970, rs10901275, rs10901281, rs10901285, rs10901294, rs10901296, rs10913690, rs11244112, rs11244146, rs11689629, rs11792273, rs11911177, rs11971170, rs12012220, rs12100401, rs12134611, rs12191230, r…
Bacterial invasion of epithelial cells	interaction, high	640	0.0002	54/71	4.247e-30	857, 858, 859, 867, 868, 998, 1398, 1399, 2335, 2549, 3611, 3678, 5295, 6714, 8503, 9844, 10092, 10109, 23533, 23624, 25759, 26084, 53358, 81873, 399694								rs10037187, rs10040640, rs10043473, rs10056163, rs10064315, rs10070943, rs10071585, rs10075612, rs1007662, rs10078240, rs1016321, rs1017148, rs10171839, rs10172425, rs10199059, rs10201850, rs10202483, rs10209954, rs10224438, rs10227696, rs10228039, rs10238916, rs10239692, rs10239693, rs10255208, rs10256450, rs10257460, rs10267165, rs10268319, rs10274668, rs10277512, rs10279544, rs10282309, rs1035…
Acute myeloid leukemia	interaction, medium	694	0.0004	48/58	5.686e-30	207, 208, 572, 595, 673, 861, 1147, 2322, 2475, 2885, 3551, 3815, 3845, 4790, 4893, 5292, 5295, 5594, 5604, 6198, 6199, 6654, 6655, 6774, 6776, 6777, 7704, 8503, 8900, 10000, 23533								rs10037187, rs10040640, rs10043473, rs10056163, rs10064315, rs1006639, rs10070943, rs10071585, rs10075612, rs10078240, rs1010447, rs1011185, rs10145260, rs1015602, rs10204958, rs10244133, rs1026916, rs10281173, rs1033335, rs10434440, rs10460712, rs10483600, rs10487888, rs10505975, rs10505980, rs10514840, rs10515052, rs10515058, rs10515062, rs10515070, rs10515086, rs1053005, rs1057079, rs1064261, …
Jak-STAT signaling pathway	pathway	2595	0.0004	136/155	4.532e-90	207, 208, 595, 598, 867, 868, 894, 896, 1154, 1271, 1387, 1437, 1439, 1440, 1441, 1489, 2033, 2056, 2057, 2688, 2689, 2690, 2885, 3439, 3440, 3441, 3442, 3443, 3444, 3445, 3447, 3448, 3449, 3451, 3452, 3454, 3455, 3456, 3458, 3459, 3460, 3467, 3558, 3559, 3560, 3562, 3565, 3566, 3567, 3568, 3569, 3570, 3572, 3574, 3575, 3578, 3586, 3587, 3588, 3592, 3593, 3594, 3595, 3596, 3597, 3598, 3600, 3716,…								rs10001582, rs1000769, rs10017471, rs10018731, rs10022682, rs1002655, rs1002656, rs10029753, rs1003199, rs10036224, rs10037187, rs10038062, rs10040640, rs10043473, rs10044080, rs10044838, rs10045084, rs1005017, rs10050597, rs10050889, rs10053847, rs10055279, rs10056163, rs10056553, rs10057637, rs10059243, rs10064191, rs10064315, rs10066764, rs10070418, rs10070943, rs10071384, rs10071585, rs100755…
Pantothenate and CoA biosynthesis	characteristic	79	0.0004	4/17	0.1511	8875, 8876, 60496								rs10502066, rs10502069, rs10502072, rs10895910, rs10895932, rs10895951, rs10895956, rs10895974, rs11154695, rs11211827, rs11211833, rs11226981, rs11226990, rs11227059, rs11227102, rs11227105, rs12274945, rs12284877, rs12285411, rs12290638, rs1626632, rs17105612, rs17105704, rs17105807, rs17105823, rs17561867, rs17562341, rs17562446, rs1793072, rs1793078, rs1893854, rs1938621, rs1940763, rs1940765…
Pathways in cancer	interaction, medium	5228	0.0004	262/327	9.224e-154	25, 207, 208, 330, 331, 332, 354, 355, 356, 367, 572, 595, 596, 598, 613, 637, 650, 652, 673, 675, 861, 867, 868, 898, 998, 1017, 1019, 1021, 1147, 1398, 1399, 1436, 1441, 1487, 1488, 1612, 1630, 1857, 1956, 2034, 2064, 2122, 2246, 2247, 2248, 2249, 2250, 2251, 2252, 2253, 2254, 2255, 2257, 2258, 2259, 2260, 2263, 2308, 2322, 2335, 2475, 2735, 2736, 2737, 2885, 2932, 3066, 3082, 3091, 3479, 3480,…								rs10001480, rs10006293, rs10006747, rs10016658, rs10024003, rs10025495, rs10026060, rs1002655, rs1002656, rs10029166, rs10029339, rs10029738, rs10033283, rs10037187, rs1003827, rs1003876, rs10040640, rs10043473, rs10045029, rs1004720, rs1004765, rs10049173, rs10049776, rs10056163, rs10062952, rs10064315, rs10064637, rs10065728, rs1006639, rs10068476, rs10070943, rs10071585, rs10075612, rs10077895…
Butanoate metabolism	characteristic	34	0.0006	5/30	0.496	65985, 79944								rs10744193, rs10773145, rs10846855, rs10846858, rs11058026, rs11058118, rs11058119, rs11058129, rs11058132, rs12369591, rs12432105, rs12578446, rs12578774, rs4765021, rs4765036, rs4901000, rs4901008, rs550677, rs551601, rs6488983, rs7134305, rs7294703, rs7306617, rs7307700, rs7311550, rs7311951, rs737077, rs7953077, rs7970937, rs7972260, rs8013174, rs8013289, rs879993, rs910641
Cholinergic synapse	pathway	3450	0.0006	93/113	3.779e-43	107, 108, 109, 111, 112, 113, 114, 115, 207, 208, 468, 596, 773, 774, 775, 776, 779, 814, 815, 816, 817, 818, 1103, 1128, 1129, 1131, 1133, 1136, 1137, 1139, 1143, 1385, 2353, 2534, 2767, 2770, 2771, 2773, 2775, 2776, 2782, 2786, 2787, 2788, 2791, 2793, 3708, 3709, 3710, 3717, 3759, 3760, 3761, 3763, 3768, 3784, 3785, 3786, 3845, 4893, 5290, 5291, 5293, 5294, 5295, 5330, 5331, 5332, 5567, 5568, 5…								rs10000775, rs1000173, rs10005635, rs10009286, rs10012684, rs10015062, rs10015110, rs1001953, rs10023113, rs10031040, rs10035541, rs10036787, rs10037187, rs10040249, rs10040640, rs10043473, rs10050608, rs10053728, rs1005546, rs10056163, rs10063966, rs10064315, rs10066581, rs1006737, rs10068942, rs10070943, rs10071585, rs10075612, rs10078240, rs10083886, rs1008454, rs10087741, rs10090173, rs100909…
RNA transport	characteristic interaction, medium	222	0.0006	81/153	1.811e-27	1207, 1967, 5905, 6612, 6613, 7341, 8563, 8662, 8664, 8666, 8892, 8893, 9688, 9818, 10073, 10289, 10460, 11097, 11171, 11260, 23165, 23279, 23511, 25929, 50628, 51808, 53371, 54960, 55706, 57122, 57510, 79023, 79760, 79833, 79897, 80145, 81929, 94026, 96764								rs1005451, rs10063061, rs1010303, rs1012411, rs10166594, rs10221121, rs10224307, rs10232205, rs10271506, rs1028745, rs1035368, rs10510708, rs1060637, rs1062923, rs1076643, rs10769307, rs10838774, rs10865143, rs10878858, rs10878860, rs1096699, rs1114832, rs11177325, rs11237260, rs11608544, rs11642892, rs11683633, rs1181156, rs1181183, rs1181185, rs1183394, rs11984203, rs12166028, rs1228008, rs1231…
Insulin signaling pathway	pathway	2064	0.0008	113/138	4.332e-68	31, 32, 207, 208, 369, 572, 673, 801, 805, 808, 810, 867, 868, 1398, 1399, 1977, 2203, 2308, 2319, 2475, 2538, 2645, 2885, 2889, 2932, 2998, 3098, 3099, 3101, 3551, 3643, 3667, 3845, 4893, 5105, 5106, 5139, 5140, 5255, 5256, 5257, 5290, 5291, 5293, 5294, 5295, 5500, 5501, 5506, 5507, 5562, 5563, 5564, 5565, 5567, 5568, 5573, 5576, 5577, 5584, 5590, 5594, 5599, 5601, 5602, 5604, 5613, 5770, 5792, …								rs10001480, rs10007750, rs10010833, rs1001745, rs10020457, rs10024003, rs10026060, rs10029339, rs1003189, rs10032829, rs10033283, rs10037187, rs10040640, rs10043473, rs10056163, rs10062565, rs10064315, rs10070943, rs10071585, rs10074991, rs10075612, rs1007662, rs10078240, rs10091799, rs1010447, rs10109698, rs1011185, rs10132049, rs10132599, rs10145260, rs1014677, rs10153674, rs10161196, rs1016124…
Small cell lung cancer	interaction, high	529	0.0010002	74/85	8.039e-49	207, 208, 330, 331, 596, 598, 1017, 1019, 1021, 1147, 2335, 3551, 3655, 3673, 3675, 4790, 4792, 5295, 5728, 7157, 7185, 8503, 10000, 23533, 54205, 79444, 112401								rs10037187, rs1003827, rs10040640, rs10043473, rs10056163, rs10064315, rs10070943, rs10071585, rs10075612, rs10078240, rs10118357, rs10132268, rs10147603, rs1015260, rs10172425, rs10199059, rs10201850, rs10202483, rs10209954, rs10230949, rs10234981, rs10269570, rs10269774, rs10276962, rs1028593, rs10430641, rs10432530, rs10435256, rs10488529, rs10498037, rs10498039, rs10501999, rs10503078, rs1050…
Cytokine-cytokine receptor interaction	interaction, medium	3739	0.00120024	215/265	6.029e-128	90, 91, 92, 93, 355, 356, 608, 643, 650, 655, 657, 658, 659, 943, 944, 958, 959, 970, 1230, 1232, 1233, 1234, 1235, 1236, 1237, 1271, 1435, 1436, 1439, 1440, 1441, 1489, 1524, 1956, 2056, 2057, 2321, 2322, 2324, 2688, 2689, 2690, 2829, 2919, 2920, 3082, 3439, 3440, 3441, 3442, 3443, 3444, 3445, 3447, 3448, 3449, 3451, 3452, 3454, 3455, 3456, 3458, 3459, 3460, 3467, 3552, 3553, 3554, 3556, 3558, 3…								rs10000203, rs10000241, rs10005096, rs1000515, rs10005450, rs10006293, rs10006360, rs10006747, rs10008126, rs10012879, rs10016230, rs10017970, rs10018945, rs1002084, rs10023994, rs1002655, rs1002656, rs10027656, rs10027875, rs10029166, rs1003199, rs10033375, rs10036224, rs10038062, rs10038760, rs10044080, rs10044838, rs10045084, rs10049681, rs10050046, rs1005017, rs10050597, rs10050889, rs1005384…
Apoptosis	interaction, medium	976	0.00140028	68/86	1.622e-39	207, 208, 317, 330, 331, 355, 356, 572, 596, 598, 637, 1147, 1439, 3551, 3552, 3553, 3554, 3556, 3562, 3654, 3656, 4615, 4790, 4792, 4803, 4914, 5295, 5530, 5532, 5533, 5534, 5567, 5568, 5613, 7124, 7157, 7186, 8503, 8737, 8743, 8772, 8793, 8794, 8795, 8797, 9020, 10000, 11213, 11261, 23533, 51135, 54205, 63928, 79444, 112401								rs10005711, rs10011961, rs10030362, rs10031159, rs10037187, rs10040640, rs10043473, rs10056163, rs10064315, rs10070943, rs10071585, rs10075612, rs1007573, rs10078240, rs1008800, rs10102276, rs10111172, rs10132268, rs10147603, rs1016379, rs10218421, rs10276962, rs1028593, rs1035347, rs1037215, rs1040605, rs1041532, rs10442682, rs10458360, rs10493750, rs10501999, rs10503078, rs10503079, rs10509561,…
Glioma	interaction, medium	1118	0.00140028	58/65	7.53e-40	207, 208, 595, 673, 801, 805, 808, 810, 815, 816, 817, 818, 1019, 1021, 1956, 2475, 2885, 3479, 3480, 3845, 4893, 5155, 5156, 5159, 5295, 5335, 5336, 5578, 5579, 5582, 5594, 5604, 5728, 6654, 6655, 7039, 7157, 8503, 10000, 23533, 25759, 51806, 53358, 399694								rs10000775, rs10005635, rs10009286, rs10012684, rs10015062, rs10015110, rs10023113, rs10031040, rs10037187, rs1003827, rs10040640, rs10043473, rs10050608, rs10056163, rs10064315, rs10066581, rs10070943, rs10071585, rs10075612, rs1007662, rs10078240, rs10082812, rs1010447, rs1010544, rs1011185, rs10132599, rs1013316, rs10145260, rs1014632, rs10153674, rs10172635, rs1019731, rs10204958, rs10230949,…
Carbohydrate digestion and absorption	interaction, medium	658	0.00180036	37/44	7.177e-24	207, 208, 276, 279, 280, 486, 3938, 5295, 5330, 5579, 6476, 6523, 8503, 8972, 10000, 23533, 80834, 346562								rs10037187, rs10040640, rs10043473, rs10056163, rs10064315, rs10070943, rs10071585, rs10075612, rs10078240, rs1013316, rs1014632, rs1015204, rs1038810, rs1042712, rs10494003, rs10494011, rs10494043, rs10499849, rs10499850, rs10515052, rs10515058, rs10515062, rs10515070, rs10515086, rs10748478, rs10748518, rs10748519, rs10785739, rs10785758, rs10785759, rs10785764, rs10803158, rs10803171, rs108054…
Salivary secretion	pathway	2990	0.00180036	77/89	2.552e-50	107, 108, 109, 111, 112, 113, 114, 115, 146, 147, 148, 153, 154, 276, 476, 477, 480, 481, 482, 483, 486, 490, 491, 492, 493, 683, 801, 805, 808, 810, 820, 952, 1131, 1469, 1470, 1471, 1472, 1473, 1755, 2776, 2778, 2977, 2982, 2983, 3708, 3709, 3710, 3778, 3783, 4025, 4069, 4589, 4842, 5330, 5331, 5332, 5542, 5554, 5567, 5568, 5578, 5579, 5582, 5592, 5593, 5613, 6263, 6522, 6548, 6558, 6779, 23236…								rs10016073, rs10019008, rs10019835, rs10032771, rs10035541, rs10036787, rs1003983, rs10053728, rs10054686, rs10063966, rs10066266, rs10068942, rs10075995, rs10082353, rs10082503, rs10087741, rs10092442, rs10093375, rs10094660, rs10095393, rs10095524, rs10096064, rs10101343, rs10102339, rs10102438, rs10104127, rs1010544, rs10108431, rs10112018, rs10128399, rs10128457, rs10128514, rs10132599, rs101…
Calcium signaling pathway	pathway	6157	0.00240048	155/177	2.355e-102	107, 108, 109, 113, 114, 115, 136, 146, 147, 148, 153, 154, 185, 291, 292, 293, 489, 490, 491, 492, 493, 552, 623, 624, 683, 773, 774, 775, 776, 777, 779, 801, 805, 808, 810, 814, 815, 816, 817, 818, 886, 887, 952, 1128, 1129, 1131, 1133, 1139, 1812, 1816, 1909, 1910, 1956, 2064, 2065, 2066, 2149, 2185, 2767, 2769, 2774, 2776, 2778, 2903, 2905, 2906, 2911, 2915, 2925, 3269, 3274, 3356, 3358, 3360…								rs1000061, rs10000775, rs10000992, rs10002658, rs10003447, rs10005574, rs10005635, rs10005711, rs10007143, rs10008134, rs10009286, rs10009905, rs10010407, rs1001064, rs10011914, rs10011961, rs10012661, rs10012684, rs10014946, rs10015062, rs10015110, rs10016073, rs10016663, rs10016888, rs10017663, rs10018343, rs10019008, rs10019405, rs10021665, rs10022164, rs10023113, rs10023700, rs10023943, rs100…
Peroxisome	pathway	1178	0.00260052	63/78	9.883e-38	30, 51, 189, 215, 225, 570, 847, 1610, 1962, 2053, 2180, 2181, 2182, 3155, 3295, 3417, 3418, 4358, 4598, 4843, 5052, 5189, 5190, 5191, 5194, 5195, 5264, 5824, 5825, 5826, 5828, 5830, 6342, 6647, 6648, 7498, 8309, 8310, 8443, 8504, 8528, 8540, 9409, 10455, 10478, 10654, 11001, 23305, 23417, 23600, 26061, 51179, 51268, 51703, 54363, 54677, 55670, 55711, 55825, 83594, 84188, 196743, 255027								rs10016221, rs10021219, rs10032937, rs10033885, rs10036615, rs10039846, rs10041164, rs10042762, rs10053373, rs10056109, rs10061706, rs10063272, rs10064760, rs10069629, rs10074987, rs10076826, rs10078652, rs10086475, rs10090781, rs10094496, rs10095813, rs10097260, rs10100175, rs10102576, rs10109008, rs10109533, rs10110693, rs1012515, rs1012731, rs1014772, rs10161126, rs10163267, rs10171290, rs1018…
Transcriptional misregulation in cancer	pathway	3720	0.00260052	151/180	9.452e-72	330, 466, 472, 597, 598, 604, 860, 861, 862, 894, 904, 905, 929, 942, 958, 1025, 1026, 1027, 1031, 1050, 1051, 1053, 1236, 1436, 1437, 1655, 1848, 2005, 2078, 2115, 2118, 2119, 2120, 2130, 2138, 2308, 2313, 2321, 2322, 2521, 2530, 2892, 3002, 3020, 3066, 3087, 3195, 3205, 3207, 3248, 3398, 3479, 3480, 3486, 3560, 3562, 3569, 3576, 3684, 3695, 3728, 4005, 4086, 4094, 4149, 4193, 4208, 4211, 4221, …								rs1002897, rs10032244, rs10052296, rs10065473, rs1006639, rs10081429, rs10082812, rs10083488, rs10083525, rs10083792, rs10085433, rs10088475, rs10092786, rs10096521, rs10096531, rs1009685, rs10098654, rs10098981, rs1009951, rs1009953, rs1010038, rs1010040, rs1010101, rs10103191, rs10103716, rs10105905, rs10106750, rs1010902, rs1010903, rs10111348, rs10111852, rs10113747, rs10114034, rs10114890, r…
Prostate cancer	pathway	1696	0.00280056	78/89	6.907e-52	207, 208, 354, 367, 369, 468, 572, 595, 596, 673, 842, 898, 1017, 1026, 1027, 1147, 1385, 1387, 1499, 1869, 1870, 1871, 1950, 1956, 2033, 2064, 2260, 2263, 2308, 2475, 2885, 2932, 2950, 3320, 3326, 3479, 3480, 3551, 3845, 4193, 4790, 4792, 4824, 4893, 5155, 5156, 5159, 5290, 5291, 5293, 5294, 5295, 5594, 5604, 5728, 5894, 5925, 5970, 6654, 6655, 6716, 6932, 6934, 7039, 7157, 7184, 8503, 9134, 958…								rs1000515, rs10017970, rs10023994, rs10027875, rs10029654, rs10033375, rs10037187, rs10040640, rs10043473, rs10055448, rs10056163, rs10064315, rs10070943, rs10071585, rs10075612, rs10078240, rs10082812, rs10092233, rs10104250, rs1010447, rs1011185, rs10132268, rs10145260, rs10147603, rs10165984, rs10172070, rs10174520, rs10180144, rs1019731, rs10204958, rs10205484, rs10224250, rs10225559, rs10226…
Osteoclast differentiation	pathway	2570	0.0030006	102/128	2.416e-59	54, 207, 208, 695, 799, 814, 1147, 1385, 1432, 1435, 1436, 1513, 1535, 1536, 1540, 2212, 2274, 2353, 2354, 2355, 2534, 2885, 3454, 3455, 3456, 3458, 3459, 3460, 3551, 3552, 3553, 3554, 3690, 3716, 3725, 3727, 3932, 3937, 4286, 4688, 4689, 4772, 4773, 4790, 4792, 4982, 5290, 5291, 5293, 5294, 5295, 5336, 5468, 5530, 5532, 5533, 5534, 5594, 5599, 5601, 5602, 5603, 5604, 5608, 5879, 5970, 6688, 6772…								rs10001480, rs10005711, rs10011961, rs1001497, rs10024003, rs10026060, rs10029339, rs10030362, rs10031159, rs10033283, rs10037187, rs10040249, rs10040640, rs10043473, rs10050695, rs10056163, rs1006355, rs10064315, rs10068619, rs10070943, rs1007126, rs10071585, rs10075612, rs10078240, rs1007837, rs1010101, rs1011170, rs10112537, rs10114465, rs10114624, rs10129564, rs10132268, rs10132979, rs1013319…
Steroid hormone biosynthesis	characteristic	51	0.00320064	5/57	0.95	412, 6715, 79644								rs10001607, rs100841, rs116364, rs12010072, rs12687038, rs13143119, rs1352741, rs1458833, rs1531293, rs1551636, rs1602407, rs166050, rs1691052, rs1691053, rs16984504, rs17178305, rs2024159, rs2199112, rs248803, rs3886784, rs4132409, rs4336284, rs4463124, rs4521923, rs4531214, rs4702374, rs476184, rs494958, rs501679, rs566202, rs5934904, rs5934913, rs5934914, rs5934958, rs5979338, rs5979643, rs653…
Hepatitis C	interaction, high	986	0.00360072	105/135	3.921e-59	207, 208, 572, 673, 949, 1147, 1364, 1365, 1432, 1956, 2885, 2932, 3439, 3440, 3441, 3442, 3443, 3444, 3445, 3447, 3448, 3449, 3451, 3452, 3454, 3455, 3456, 3551, 3576, 3659, 3716, 4790, 4792, 5010, 5295, 5518, 5519, 5594, 5599, 5601, 5602, 5603, 5610, 6041, 6772, 6774, 7098, 7124, 7157, 7297, 8503, 8737, 9021, 9071, 9073, 9074, 9075, 9076, 9451, 9641, 10000, 10686, 23533, 23562, 26285, 27102, 29…								rs10001480, rs1001162, rs10024003, rs10026060, rs10029339, rs10033283, rs10037187, rs10040640, rs10043473, rs10056163, rs10064315, rs10070943, rs10071585, rs10075612, rs10078240, rs1008434, rs10085952, rs1009438, rs10099072, rs10110591, rs10116540, rs10116615, rs10119678, rs10132268, rs10147603, rs1016930, rs10199181, rs10244108, rs10244133, rs10256393, rs10263017, rs1026916, rs10281173, rs102859…
Dilated cardiomyopathy	pathway	3143	0.00380076	81/90	6.169e-56	60, 70, 71, 107, 108, 109, 111, 112, 113, 114, 115, 153, 775, 776, 779, 781, 782, 783, 784, 785, 786, 1605, 1674, 1756, 2778, 3479, 3655, 3672, 3673, 3674, 3675, 3676, 3678, 3679, 3680, 3685, 3688, 3690, 3691, 3693, 3694, 3695, 3696, 3908, 4000, 4607, 4624, 4625, 4633, 4634, 5567, 5568, 5613, 6262, 6442, 6443, 6444, 6445, 6546, 7042, 7043, 7124, 7139, 7168, 7169, 7170, 7171, 7273, 8515, 8516, 925…								rs1000014, rs1002671, rs10035541, rs10036164, rs1003617, rs10036440, rs10036787, rs1003738, rs10038971, rs10039324, rs10044804, rs10045068, rs10048831, rs10049174, rs10049380, rs1005077, rs1005213, rs10053728, rs1005381, rs10056289, rs10057067, rs10061798, rs10063966, rs10064971, rs1006737, rs10068942, rs10073394, rs10076488, rs10077734, rs1007856, rs10082812, rs10087741, rs10093375, rs10095393, …
Hypertrophic cardiomyopathy (HCM)	pathway	2701	0.00460092	74/83	1.713e-50	60, 70, 71, 775, 776, 779, 781, 782, 783, 784, 785, 786, 1605, 1636, 1674, 1756, 3479, 3569, 3655, 3672, 3673, 3674, 3675, 3676, 3678, 3679, 3680, 3685, 3688, 3690, 3691, 3693, 3694, 3695, 3696, 3908, 4000, 4607, 4624, 4625, 4633, 4634, 5562, 5563, 5564, 5565, 6262, 6442, 6443, 6444, 6445, 6546, 7042, 7043, 7124, 7139, 7168, 7169, 7170, 7171, 7273, 8515, 8516, 9254, 10368, 10369, 22801, 27091, 27…								rs1000014, rs1002671, rs10036164, rs1003617, rs10036440, rs1003738, rs10038971, rs10039324, rs10044804, rs10045068, rs10048831, rs10049174, rs10049380, rs1005077, rs1005213, rs1005381, rs10056289, rs10057067, rs10061798, rs10062565, rs10064971, rs1006737, rs10073394, rs10074991, rs10076488, rs10077734, rs1007856, rs10082812, rs1012311, rs1014038, rs1015260, rs10157412, rs1015846, rs10161032, rs10…
T cell receptor signaling pathway	interaction, medium	1991	0.00620124	91/108	3.612e-57	207, 208, 867, 868, 915, 916, 919, 920, 925, 926, 940, 959, 998, 1019, 1147, 1326, 1432, 1493, 1739, 2534, 2885, 2932, 3458, 3551, 3558, 3565, 3586, 3702, 3845, 3932, 3937, 4690, 4790, 4792, 4793, 4893, 5058, 5062, 5063, 5295, 5335, 5530, 5532, 5533, 5534, 5588, 5594, 5601, 5603, 5604, 5788, 6654, 6655, 6885, 7006, 7124, 7409, 7410, 7535, 8440, 8503, 8915, 9020, 9402, 10000, 10298, 10451, 11261, …								rs10005711, rs10011961, rs10030362, rs10031159, rs10037187, rs10040640, rs10043473, rs1004725, rs10050695, rs10056163, rs1005834, rs10064315, rs10068619, rs10070943, rs10071585, rs10075612, rs10078240, rs10079961, rs1011170, rs1011185, rs10119727, rs10132268, rs10145260, rs1014573, rs10147603, rs10172481, rs10174652, rs10179639, rs10180136, rs10180552, rs10180781, rs10182846, rs10193976, rs101942…
Chronic myeloid leukemia	interaction, ultra	148	0.00660132	65/73	2.147e-44	572, 673, 861, 23533								rs1006639, rs1015602, rs10244133, rs10281173, rs1033335, rs10460712, rs10487888, rs10854374, rs11088309, rs11231741, rs11659127, rs11700684, rs11700843, rs11700942, rs11762469, rs12482247, rs1267612, rs1267648, rs1267649, rs12945251, rs1304527, rs13047845, rs13052634, rs1474479, rs1476868, rs1537099, rs1547237, rs17161750, rs17264072, rs1734522, rs1734524, rs17623204, rs17695935, rs17740182, rs18…
RNA degradation	interaction, ultra	527	0.00760152	30/71	3.558e-08	694, 7832, 10140, 10200, 10950, 22803, 23404, 51010, 51013, 54464, 54766, 80153, 132430, 219988, 255967, 645974								rs10004741, rs10008635, rs10008835, rs10009368, rs10011855, rs10013441, rs10013928, rs10018126, rs10029269, rs10029804, rs10029953, rs10049821, rs1011403, rs1011433, rs1014351, rs1014353, rs1038151, rs10434086, rs10445383, rs10489022, rs10507009, rs10514525, rs10514532, rs10514533, rs10519350, rs10519362, rs10519369, rs10519370, rs10519401, rs10519404, rs10519410, rs10519417, rs1056654, rs1074524…
Amoebiasis	pathway	2462	0.00780156	99/106	3.832e-72	81, 87, 88, 89, 107, 383, 384, 731, 732, 735, 836, 912, 929, 1277, 1278, 1280, 1281, 1282, 1284, 1286, 1288, 1289, 1290, 1301, 1302, 1437, 1511, 1992, 2335, 2767, 2769, 2774, 2776, 2778, 2919, 3315, 3458, 3553, 3554, 3569, 3576, 3586, 3592, 3593, 3684, 3689, 3908, 3909, 3910, 3911, 3912, 3914, 3915, 3918, 4583, 4790, 4843, 5055, 5269, 5272, 5273, 5275, 5290, 5291, 5293, 5294, 5295, 5330, 5331, 53…								rs1003199, rs10037187, rs1003979, rs10040640, rs10043473, rs10048945, rs10056163, rs10064315, rs10070943, rs10071585, rs10075612, rs10078240, rs10088475, rs1009145, rs1009588, rs1010544, rs10105905, rs10106750, rs10111852, rs10115005, rs1013316, rs10141794, rs1014632, rs1015416, rs1015846, rs10161783, rs10163726, rs1016379, rs10166736, rs10172425, rs10172458, rs10176882, rs10177513, rs10178202, r…
Axon guidance	characteristic interaction, medium	2880	0.00780156	76/130	1.168e-29	1808, 1942, 1944, 1946, 1947, 1948, 2041, 2042, 2043, 2045, 2051, 3983, 5998, 6091, 6092, 8633, 9723, 9901, 10507, 10509, 10512, 22885, 23380, 25791, 27289, 29984, 56896, 57522, 57689, 64221, 84448, 90249, 137970, 219699, 223117, 285220								rs1000144, rs10007047, rs1000987, rs10010112, rs10017332, rs10019264, rs1001952, rs1002254, rs10023553, rs10024436, rs1002825, rs1002826, rs10043302, rs10044396, rs10045557, rs10049058, rs10049501, rs10063716, rs10068445, rs10070246, rs1007684, rs10079296, rs10084692, rs10088476, rs10090689, rs10093451, rs1009521, rs1009848, rs10098626, rs10099045, rs10099704, rs10100213, rs10101147, rs10104759, …
Fc gamma R-mediated phagocytosis	interaction, ultra	134	0.00780156	63/95	2.805e-29	998, 2212, 4082, 8877, 10092, 10109, 23533, 27040, 81873								rs10171839, rs1033391, rs1033804, rs10484458, rs10494355, rs1051358, rs10917139, rs10917145, rs10917148, rs10917152, rs10986471, rs11153377, rs11153450, rs11659127, rs12022054, rs12213036, rs12214468, rs12660275, rs12717171, rs12725465, rs12738660, rs12744234, rs12745664, rs12746613, rs1276533, rs1276535, rs1276576, rs1276577, rs12945251, rs1299158, rs13026485, rs13208937, rs1321028, rs13430006, …
Gastric acid secretion	pathway	2262	0.00780156	71/74	2.66e-54	60, 107, 108, 109, 111, 112, 113, 114, 115, 476, 477, 480, 481, 482, 483, 495, 496, 760, 801, 805, 808, 810, 815, 816, 817, 818, 887, 1080, 1131, 2520, 2770, 2771, 2773, 2776, 2778, 3274, 3708, 3709, 3710, 3758, 3759, 3766, 3772, 3773, 3776, 3784, 4638, 5330, 5331, 5332, 5567, 5568, 5578, 5579, 5582, 5613, 6522, 6548, 6750, 6752, 7430, 9992, 23236, 23439, 51806, 54207, 85366, 91807, 115111, 19688…								rs10000775, rs10005635, rs10009286, rs10012684, rs10015062, rs10015110, rs10023113, rs10031040, rs10035541, rs10036787, rs10037879, rs1005043, rs10050608, rs10053728, rs10063966, rs10066581, rs10068942, rs10083886, rs10087741, rs1009207, rs10093375, rs10095393, rs10095524, rs10099092, rs10104127, rs1010544, rs1010665, rs10108431, rs10112018, rs1011729, rs1013063, rs10132599, rs1013316, rs10140031…
Amyotrophic lateral sclerosis (ALS)	characteristic	90	0.00840168	42/53	5.9e-25	4741, 4744, 4747, 5630, 5961, 57679								rs10110118, rs1012473, rs10469756, rs10503747, rs10503755, rs10503759, rs10875942, rs11135815, rs11135818, rs11135825, rs11135835, rs11777251, rs11779789, rs11779795, rs11783793, rs11989437, rs11990537, rs12470229, rs12545967, rs12546913, rs12546920, rs12549843, rs13253754, rs13281358, rs1352950, rs1457265, rs1492406, rs1492408, rs165734, rs17052096, rs17052156, rs17052420, rs17052736, rs17052934…
Homologous recombination	interaction, medium	103	0.00880176	8/28	0.0339	675, 4361, 4683, 5424, 6119, 10714, 80198, 146956								rs10109454, rs10237424, rs10243568, rs10244745, rs10255964, rs10262410, rs10263125, rs10277940, rs10278342, rs10501815, rs10793091, rs10793092, rs10831227, rs10899024, rs10952075, rs11236133, rs11236173, rs11236181, rs11236187, rs11236188, rs11236190, rs11508478, rs11571725, rs11971467, rs11974031, rs11978169, rs12702633, rs12702665, rs12702682, rs13230086, rs13231388, rs13234751, rs13234855, rs1…
Neuroactive ligand-receptor interaction	interaction, ultra	1138	0.00920184	124/272	5.669e-33	728, 1081, 1134, 1135, 1136, 1137, 1138, 1139, 1140, 1142, 1143, 1146, 2488, 2554, 2555, 2556, 2557, 2558, 2559, 2560, 2561, 2562, 2564, 2565, 2566, 2567, 2568, 2569, 2570, 2688, 2689, 2741, 2742, 2743, 3952, 5023, 5024, 5025, 5026, 5027, 5617, 5618, 7252, 8001, 8973, 9127, 55584, 55879, 57053, 200959								rs10000940, rs10002281, rs10007816, rs10008749, rs10015366, rs10016894, rs10018276, rs10018305, rs10021452, rs10021851, rs10023614, rs10023908, rs10025589, rs10025670, rs10025924, rs10028342, rs10029872, rs10034588, rs10035934, rs10038062, rs10044982, rs10045843, rs10050095, rs10050597, rs10052775, rs10053232, rs10053272, rs10056305, rs10057637, rs10060800, rs10061779, rs10067788, rs10068980, rs1…
Leukocyte transendothelial migration	characteristic interaction, high	32	0.00980196	89/117	7.884e-49	7070, 7294								rs10007288, rs1003873, rs1009365, rs10750156, rs10938521, rs11217290, rs13118073, rs1466998, rs1567217, rs17574051, rs17674224, rs2262771, rs2661528, rs2663632, rs2704401, rs33964061, rs4589663, rs4938653, rs4938659, rs4938687, rs535831, rs6447614, rs6829490, rs6837324, rs6850108, rs7111455, rs7111567, rs7130716, rs733762, rs7674929, rs7679010, rs7932332
Type II diabetes mellitus	pathway	1178	0.010002	42/48	2.157e-28	773, 774, 775, 776, 777, 2475, 2645, 3098, 3099, 3101, 3551, 3643, 3651, 3667, 3767, 5290, 5291, 5293, 5294, 5295, 5580, 5581, 5590, 5594, 5599, 5601, 5602, 6514, 6517, 6833, 7124, 8471, 8503, 8651, 8660, 8835, 8913, 9021, 9370, 23533, 80201, 122809								rs10001480, rs10024003, rs10026060, rs10029339, rs10033283, rs10037187, rs10040640, rs10043473, rs10056163, rs10064315, rs1006737, rs10070943, rs10071585, rs10075612, rs10078240, rs1010447, rs1010887, rs1014677, rs10157919, rs10161032, rs10161275, rs10166692, rs10167883, rs10179260, rs10179954, rs10187044, rs10188306, rs10189339, rs10201978, rs10202504, rs1020445, rs10210199, rs10211547, rs102188…
Adherens junction	interaction, medium	1861	0.0108022	62/73	1.027e-39	52, 81, 87, 88, 89, 998, 1457, 1459, 1956, 2064, 2241, 2260, 2534, 3480, 3643, 4008, 4087, 4088, 4089, 4301, 5594, 5770, 5787, 5792, 5795, 5797, 5818, 5819, 5879, 5880, 6591, 6615, 6714, 6885, 7046, 7048, 7082, 7525, 9855, 10580, 25945, 51701, 56288, 81607, 117178								rs1001877, rs1002715, rs10043540, rs1004765, rs10049325, rs10055161, rs1005785, rs10062069, rs1006309, rs1006412, rs10064960, rs10069821, rs1007369, rs10074150, rs1007530, rs10076453, rs10077992, rs10078397, rs1009145, rs10100077, rs1011170, rs10141794, rs1014573, rs10159479, rs1016188, rs1019855, rs1020322, rs10218857, rs1022649, rs10244108, rs10256393, rs1034551, rs1035940, rs1035942, rs1036097…
Cell cycle	characteristic	175	0.0110022	74/128	1.761e-28	990, 4998, 4999, 5000, 5001, 5885, 7029, 7272, 7465, 8317, 8318, 8555, 8556, 10274, 10735, 23595, 494551								rs10111415, rs10157619, rs10167387, rs10205561, rs10231843, rs10246098, rs10257653, rs10493923, rs10500708, rs10513016, rs1063302, rs10743113, rs10770040, rs10770047, rs10783130, rs10840269, rs10875290, rs10943681, rs11042427, rs11164774, rs11164953, rs11166437, rs11166438, rs11569193, rs11569214, rs11569218, rs11705932, rs11760007, rs1192404, rs1192419, rs11993769, rs12053401, rs12056137, rs1205…
mTOR signaling pathway	pathway	1175	0.0110022	42/52	1.443e-25	207, 208, 673, 1975, 1977, 2475, 3091, 3479, 3551, 3667, 5228, 5290, 5291, 5293, 5294, 5295, 5562, 5563, 5578, 5579, 5582, 5594, 5728, 6009, 6194, 6195, 6196, 6197, 6198, 6199, 7124, 7248, 7249, 7422, 7424, 8408, 8503, 9470, 9706, 10000, 10325, 10670, 23533, 27330, 51719, 54541, 57521, 58528, 64121, 81617, 84335, 92335, 253260, 253314								rs10006293, rs10006747, rs10029166, rs1003642, rs10037187, rs10040640, rs10043473, rs10056163, rs10062565, rs10064315, rs10070943, rs10071585, rs10074991, rs10075612, rs10078240, rs10082812, rs1010447, rs1010544, rs1011851, rs1013316, rs1014632, rs10179260, rs10187044, rs1019731, rs10226981, rs10244133, rs1025612, rs10281173, rs1029952, rs1029955, rs1032130, rs10430641, rs10451280, rs10451590, rs…
Non-small cell lung cancer	interaction, high	493	0.0110022	46/54	6.892e-30	207, 208, 572, 673, 1019, 1021, 1956, 2064, 2885, 5295, 5335, 5336, 5594, 5604, 6789, 7039, 7157, 8503, 10000, 23533								rs10037187, rs1003827, rs10040640, rs10043473, rs10056163, rs10064315, rs10070943, rs10071585, rs10075612, rs10078240, rs10230949, rs10234981, rs10244108, rs10244133, rs10256393, rs10269570, rs10269774, rs10281173, rs10435256, rs10487888, rs10488140, rs10488142, rs10488529, rs10496179, rs10514519, rs10515052, rs10515058, rs10515062, rs10515070, rs10515086, rs1076094, rs10803158, rs10803171, rs108…
Lipoic acid metabolism	pathway	19	0.0120024	3/3	0.003599	11019, 51601, 387787								rs1303475, rs1315212, rs1316182, rs17310612, rs17310619, rs1787102, rs2125314, rs2309581, rs2309582, rs2509562, rs2509563, rs2632277, rs594628, rs655025, rs657339, rs661781, rs675086, rs684877, rs7121457
Neurotrophin signaling pathway	pathway	2102	0.0126025	109/127	4.513e-70	25, 207, 208, 356, 397, 468, 572, 596, 627, 673, 801, 805, 808, 810, 814, 815, 816, 817, 818, 998, 1398, 1399, 1432, 2309, 2549, 2885, 2889, 2932, 3551, 3654, 3656, 3667, 3725, 3845, 4214, 4215, 4217, 4790, 4792, 4793, 4803, 4804, 4893, 4908, 4909, 4914, 4915, 4916, 5163, 5290, 5291, 5293, 5294, 5295, 5335, 5336, 5580, 5594, 5598, 5599, 5601, 5602, 5603, 5604, 5607, 5663, 5664, 5781, 5879, 5894, …								rs10000775, rs10001480, rs10005635, rs10009286, rs10012684, rs10015062, rs10015110, rs1002261, rs10023113, rs10024003, rs10026060, rs10029339, rs10031040, rs10033283, rs1003642, rs10037187, rs10037963, rs10040249, rs10040640, rs10043473, rs10050608, rs10051671, rs10056163, rs10064315, rs1006446, rs10066581, rs10070943, rs10071585, rs10075612, rs1007662, rs10078240, rs10087008, rs10103760, rs10106…
Chagas disease (American trypanosomiasis)	interaction, high	1045	0.0130026	86/104	1.005e-52	207, 208, 355, 624, 718, 915, 916, 919, 1147, 1432, 1636, 3456, 3459, 3460, 3551, 3553, 3558, 3569, 3576, 3586, 3592, 3593, 3654, 4615, 4790, 4792, 5054, 5295, 5330, 5331, 5332, 5518, 5519, 5594, 5599, 5601, 5602, 5603, 6347, 6348, 6352, 6416, 7046, 7048, 7097, 7099, 7124, 8503, 8772, 10000, 23236, 23533, 51135, 148022								rs10001480, rs10024003, rs10026060, rs10029339, rs1003199, rs10033283, rs10037187, rs10040640, rs10043473, rs10056163, rs10064315, rs10070943, rs10071585, rs10075612, rs10078240, rs10132268, rs10132489, rs10140368, rs10142830, rs10144552, rs10147603, rs10149714, rs1019855, rs1022596, rs10255691, rs10263896, rs1028593, rs1036097, rs1036307, rs1040496, rs10413435, rs10417820, rs10423794, rs10424348…
Arrhythmogenic right ventricular cardiomyopathy (ARVC)	pathway	3757	0.0132026	70/74	2.679e-52	60, 71, 81, 87, 88, 89, 775, 776, 779, 781, 782, 783, 784, 785, 786, 1000, 1495, 1496, 1499, 1605, 1674, 1756, 1824, 1829, 1832, 2697, 3655, 3672, 3673, 3674, 3675, 3676, 3678, 3679, 3680, 3685, 3688, 3690, 3691, 3693, 3694, 3695, 3696, 3728, 3908, 4000, 5318, 6262, 6442, 6443, 6444, 6445, 6546, 6932, 6934, 8515, 8516, 9254, 10368, 10369, 22801, 27091, 27092, 29119, 51176, 55799, 59284, 59285, 83…								rs1000014, rs1002671, rs10036164, rs1003617, rs10036440, rs1003738, rs10038162, rs10038971, rs10039324, rs10043478, rs10044804, rs10045068, rs10048831, rs10049174, rs10049380, rs1005077, rs1005213, rs1005381, rs10055448, rs10056289, rs10057067, rs10061798, rs10064971, rs1006607, rs1006737, rs10073394, rs10076488, rs1007740, rs10077734, rs1007856, rs1008011, rs1009145, rs1012311, rs10128270, rs101…
Serotonergic synapse	characteristic	117	0.0138028	8/114	1	3359, 3751, 6532, 9177, 170572, 200909, 260293, 285242								rs10156120, rs10156125, rs10224891, rs10257987, rs10258965, rs10277086, rs10278347, rs10464520, rs10488291, rs10488302, rs1072198, rs1072394, rs10890445, rs10891623, rs10953880, rs10953885, rs10953909, rs10953918, rs11080122, rs11211414, rs11211420, rs11214786, rs11487118, rs11489533, rs11608102, rs11718245, rs11765076, rs1176752, rs1185027, rs11980474, rs12666459, rs12706212, rs12706259, rs12706…
Cardiac muscle contraction	pathway	1629	0.0146029	53/77	4.735e-26	70, 476, 477, 480, 481, 482, 483, 486, 775, 776, 779, 781, 782, 783, 784, 785, 786, 1327, 1337, 1345, 1350, 1351, 4624, 4625, 4633, 4634, 6262, 6546, 6548, 7139, 7168, 7169, 7170, 7171, 7381, 7386, 9167, 9254, 9377, 10368, 10369, 10479, 23439, 27089, 27091, 27092, 55799, 59284, 59285, 84701, 93589, 170712, 440567								rs1000014, rs10005129, rs1002671, rs1003617, rs1003738, rs10040791, rs10048831, rs10049174, rs1005077, rs10051603, rs1005213, rs1005381, rs10065919, rs1006737, rs10092898, rs1012311, rs10157412, rs10161032, rs10161275, rs10168228, rs10170610, rs10170699, rs10174354, rs10175048, rs10175239, rs10179528, rs10180845, rs10183045, rs10183585, rs10184755, rs10193285, rs10195970, rs1019617, rs10199504, r…
ErbB signaling pathway	interaction, high	1813	0.015203	78/87	1.341e-53	25, 27, 207, 208, 374, 572, 673, 685, 815, 816, 817, 818, 867, 868, 1398, 1399, 1839, 1956, 2064, 2065, 2066, 2069, 2475, 2549, 2885, 2932, 3084, 4690, 5058, 5062, 5063, 5295, 5335, 5336, 5594, 5599, 5601, 5602, 5604, 6198, 6199, 6416, 6714, 6776, 6777, 7039, 8440, 8503, 9542, 10000, 10298, 23533, 23624, 25759, 53358, 56924, 57144, 145957, 399694								rs10000775, rs10001480, rs10002688, rs10005635, rs10009286, rs10012684, rs10015062, rs10015110, rs10017114, rs10022745, rs10023113, rs10024003, rs10025144, rs10026060, rs10029339, rs10031040, rs10033283, rs10037187, rs10040640, rs10043473, rs1004725, rs10050608, rs10056163, rs10064315, rs10066581, rs10070943, rs10071585, rs10075612, rs1007662, rs10078240, rs10087434, rs10089599, rs10093657, rs100…
Fatty acid biosynthesis	pathway	109	0.015203	5/6	0.0004289	31, 32, 27349, 54995, 55301								rs1016331, rs1021795, rs10510578, rs10796255, rs10849968, rs10906796, rs10906802, rs10906804, rs10906817, rs1109760, rs11129232, rs11259456, rs1160716, rs1160717, rs11650464, rs11708232, rs11867736, rs11924347, rs12450937, rs12490758, rs12633182, rs12715100, rs12831686, rs13059059, rs13099515, rs13815, rs1426758, rs1469330, rs1473626, rs1502393, rs1502394, rs1642038, rs1654875, rs16939972, rs1693…
Amphetamine addiction	pathway	2375	0.0176035	57/70	1.82e-26	111, 468, 775, 776, 801, 805, 808, 810, 814, 815, 816, 817, 818, 1385, 1386, 1644, 1812, 2353, 2354, 2778, 2890, 2891, 2892, 2893, 2903, 2904, 2905, 2906, 3725, 4128, 4129, 5173, 5500, 5501, 5530, 5532, 5533, 5534, 5567, 5568, 5578, 5579, 5582, 5613, 6531, 6570, 6571, 9586, 11261, 23237, 23411, 51806, 63928, 64764, 84699, 90993, 116443								rs10000610, rs10000775, rs10004211, rs10005635, rs10005711, rs10009286, rs10011455, rs10011961, rs10012684, rs10015062, rs10015110, rs10023113, rs10030362, rs10031040, rs10031159, rs10031554, rs10035262, rs10035289, rs10040249, rs10045463, rs10050608, rs10052016, rs10053602, rs1005549, rs10056328, rs10057481, rs10057497, rs10061978, rs10066581, rs1006737, rs10067604, rs10069450, rs10070447, rs100…
Pancreatic secretion	pathway	2511	0.0176035	91/101	7.79e-63	107, 108, 109, 111, 112, 113, 114, 115, 279, 280, 476, 477, 480, 481, 482, 483, 486, 489, 490, 491, 492, 493, 683, 760, 886, 952, 1056, 1080, 1131, 1179, 1357, 1358, 1359, 1360, 1361, 1504, 1811, 2776, 2778, 3708, 3709, 3710, 3778, 3784, 4218, 5319, 5320, 5321, 5322, 5330, 5331, 5332, 5406, 5407, 5408, 5578, 5579, 5582, 5644, 5645, 5646, 5874, 5879, 5906, 5908, 6262, 6344, 6522, 6548, 6558, 7220,…								rs10016073, rs10019008, rs10034033, rs10035541, rs10036787, rs10053728, rs10063966, rs10068942, rs10087741, rs10093375, rs10095393, rs10095524, rs10104127, rs1010544, rs10108431, rs10112018, rs1013316, rs1013510, rs1014632, rs1014699, rs10157412, rs1018378, rs10198275, rs10200558, rs1021457, rs10223203, rs1022596, rs1023096, rs10231513, rs10247485, rs10250598, rs10252537, rs10263705, rs10275313, …
Renin-angiotensin system	interaction, ultra	74	0.0194039	8/17	0.00165	183, 1359, 1636, 4311, 5972, 59272								rs1025192, rs10513468, rs10513469, rs10900555, rs11122576, rs11122577, rs11571082, rs11571093, rs11712763, rs11919465, rs11927211, rs12163649, rs12696030, rs13081372, rs13086740, rs1436633, rs1436635, rs1440633, rs1440640, rs1525867, rs16824293, rs16824404, rs16853059, rs17383987, rs17442808, rs17449556, rs1926723, rs1949350, rs2118073, rs2313950, rs233575, rs2368564, rs2887284, rs35778406, rs377…
Vascular smooth muscle contraction	pathway	3796	0.0196039	99/116	3.22e-63	59, 72, 107, 108, 109, 111, 112, 113, 114, 115, 136, 146, 147, 148, 185, 369, 552, 673, 775, 776, 779, 800, 801, 805, 808, 810, 1579, 1909, 2767, 2768, 2776, 2778, 2977, 2982, 2983, 3708, 3709, 3710, 3778, 4629, 4637, 4638, 4659, 4660, 4881, 4882, 5319, 5320, 5321, 5322, 5330, 5331, 5332, 5500, 5501, 5567, 5568, 5578, 5579, 5580, 5581, 5582, 5583, 5588, 5592, 5594, 5604, 5613, 5739, 5894, 6093, 8…								rs10003447, rs10019835, rs10028838, rs10032771, rs10035541, rs10036787, rs1003983, rs10053728, rs1006168, rs10063966, rs1006737, rs10068942, rs10082235, rs10082353, rs10082503, rs1008663, rs10087363, rs10087741, rs10092442, rs10093375, rs10094660, rs10095393, rs10095524, rs10096064, rs10101343, rs10102339, rs10102438, rs10104127, rs1010544, rs1010669, rs10108431, rs10112018, rs10128399, rs1012845…
Phototransduction	characteristic	23	0.019804	14/29	2.485e-05	1259, 5957, 6010, 9187								rs10002498, rs12501949, rs1371729, rs1550444, rs1558226, rs16948889, rs16948916, rs17573717, rs17681738, rs1972883, rs1984713, rs2270115, rs2855557, rs3743171, rs3762858, rs3762859, rs6503264, rs6503269, rs6841271, rs7694104, rs870022, rs874174, rs9995122
Melanoma	interaction, high	1511	0.0210042	62/71	2.978e-41	207, 208, 572, 673, 1019, 1021, 1956, 2246, 2247, 2248, 2249, 2250, 2251, 2252, 2253, 2254, 2255, 2257, 2258, 2259, 2260, 3082, 3479, 3480, 5155, 5156, 5159, 5295, 5594, 5604, 5728, 7157, 8074, 8503, 8817, 8823, 9965, 10000, 23533, 26281, 56034, 80310								rs1000515, rs10016658, rs10017970, rs10023994, rs10025495, rs10027875, rs10033375, rs10037187, rs1003827, rs10040640, rs10043473, rs10045029, rs1004720, rs10049776, rs10056163, rs10062952, rs10064315, rs10064637, rs10065728, rs10068476, rs10070943, rs10071585, rs10075612, rs10077895, rs10078240, rs10082812, rs10090333, rs1011357, rs1011814, rs10126078, rs10126815, rs1019731, rs10213174, rs1023094…
Starch and sucrose metabolism	interaction, high	481	0.0214043	24/55	3.861e-07	178, 276, 279, 280, 2548, 2595, 2821, 2990, 5169, 6476, 7358, 8972, 9365, 57733								rs10008808, rs10021978, rs10023191, rs1015204, rs1038810, rs1038821, rs10433830, rs10470807, rs10488997, rs10494003, rs10494011, rs10494043, rs10517007, rs10517021, rs10518763, rs10748478, rs10748518, rs10748519, rs10785739, rs10785758, rs10785759, rs10785764, rs1086089, rs1086090, rs1086092, rs1086514, rs10881300, rs10881363, rs10881418, rs10881449, rs10938939, rs10938941, rs10938957, rs11166382…
Aminoacyl-tRNA biosynthesis	characteristic	343	0.0228046	29/63	5.884e-09	16, 833, 1615, 2617, 3035, 3376, 3735, 4677, 5917, 6301, 6897, 7453, 8565, 10056, 10352, 10667, 23395, 25973, 51067, 51520, 55157, 55699, 57038, 57176, 57505, 79587, 79731, 80222, 123283								rs10054670, rs10071837, rs1008198, rs1009606, rs10120980, rs10438233, rs10438234, rs10444899, rs10458088, rs10484314, rs10516047, rs10751297, rs10761149, rs10761150, rs10793324, rs1080, rs10844337, rs10899551, rs10914621, rs10923718, rs10923726, rs10923748, rs10923755, rs10923799, rs10932966, rs10992260, rs11052214, rs11102957, rs11130066, rs11160582, rs1118953, rs11237522, rs11237537, rs11243004…
Melanogenesis	characteristic interaction, ultra	64	0.0228046	76/101	2.811e-41	434, 1906								rs1022848, rs1023483, rs1040994, rs10456105, rs10456479, rs10947862, rs10947954, rs11753185, rs11970595, rs12200432, rs12216318, rs12524361, rs1317584, rs13199416, rs13211009, rs13217076, rs1331478, rs1360468, rs1413512, rs1413513, rs1548309, rs1626492, rs16872628, rs17592421, rs1931548, rs2012560, rs2050288, rs2050289, rs2070699, rs2095343, rs2180030, rs2327589, rs2490444, rs2516234, rs2516250, …
Metabolism of xenobiotics by cytochrome P450	characteristic interaction, medium	6	0.0276055	3/71	0.9993	1572, 8574, 22977, 29785								rs11808495, rs1628289, rs1631931, rs338586, rs4483432, rs9729157
GnRH signaling pathway	pathway	2650	0.0282056	86/101	7.312e-55	107, 108, 109, 111, 112, 113, 114, 115, 468, 775, 776, 779, 801, 805, 808, 810, 815, 816, 817, 818, 998, 1081, 1432, 1839, 1956, 2185, 2488, 2767, 2776, 2778, 2796, 2797, 2798, 2885, 3708, 3709, 3710, 3725, 3845, 4214, 4215, 4216, 4313, 4893, 5319, 5320, 5321, 5322, 5330, 5331, 5332, 5337, 5338, 5567, 5568, 5578, 5579, 5580, 5594, 5598, 5599, 5601, 5602, 5603, 5604, 5606, 5608, 5613, 5894, 6416, …								rs10000775, rs10001480, rs10005635, rs1000754, rs10009286, rs10012684, rs10015062, rs10015110, rs10023113, rs10024003, rs10026060, rs10029339, rs10031040, rs10033283, rs10035541, rs10036787, rs10037963, rs10050608, rs10051671, rs10053728, rs10063966, rs10066581, rs1006737, rs10068942, rs10087741, rs10093375, rs10095393, rs10095524, rs10100812, rs10104127, rs1010544, rs10108431, rs10109834, rs1011…
Pancreatic cancer	interaction, high	814	0.0290058	61/70	1.729e-40	207, 208, 572, 598, 673, 675, 998, 1019, 1021, 1147, 1956, 2064, 3551, 3716, 4790, 5228, 5295, 5337, 5594, 5599, 5601, 5602, 5604, 6772, 6774, 7039, 7046, 7048, 7157, 7422, 7424, 8503, 9459, 10000, 23533								rs10001480, rs10006293, rs10006747, rs10024003, rs10026060, rs10029166, rs10029339, rs10033283, rs10037187, rs1003827, rs10040640, rs10043473, rs10056163, rs10064315, rs10070943, rs10071585, rs10075612, rs10078240, rs1011851, rs1019855, rs10199181, rs10230949, rs10234981, rs10244108, rs10244133, rs1025612, rs10256393, rs1026916, rs10269570, rs10269774, rs10281173, rs1036097, rs1036307, rs10435256…
Pathogenic Escherichia coli infection	pathway	712	0.0306061	43/58	1.808e-23	25, 60, 71, 929, 998, 999, 1499, 2017, 2534, 3059, 3688, 3875, 4690, 4691, 5578, 6093, 7099, 7100, 7278, 7280, 7430, 7454, 7534, 7846, 8440, 8976, 9076, 9475, 10092, 10094, 10109, 10552, 10971, 23643, 51807, 79861, 81027, 81873, 84617, 84790, 203068, 347688, 347733								rs1010544, rs10167277, rs10171839, rs10180552, rs10182846, rs10187701, rs10194269, rs10198045, rs10198057, rs10203692, rs10205944, rs1022649, rs1035016, rs1037381, rs1039225, rs10431923, rs10451280, rs10490696, rs10491174, rs10491200, rs10492522, rs10495571, rs10495572, rs10495582, rs10512513, rs1051358, rs10513848, rs10754958, rs10783310, rs1078621, rs10793970, rs10795273, rs10808365, rs10827164…
Retinol metabolism	interaction, ultra	43	0.0308062	6/64	0.9413	6121, 9227, 53630, 158835								rs10493440, rs10889758, rs11209241, rs11639552, rs11645428, rs11859133, rs12149653, rs1409993, rs156501, rs156543, rs156553, rs17130691, rs17186765, rs1876031, rs1925953, rs2012235, rs201820, rs2225019, rs2281932, rs276168, rs276169, rs276170, rs3125894, rs3125895, rs3125904, rs4508052, rs47379, rs4889293, rs4889294, rs4926330, rs6564852, rs6564859, rs6564863, rs6828439, rs7192773, rs728894, rs74…
mRNA surveillance pathway	pathway	1250	0.0314063	68/84	9.399e-41	1477, 1478, 1479, 2107, 2935, 4440, 4686, 5042, 5411, 5500, 5501, 5515, 5518, 5519, 5520, 5521, 5522, 5523, 5525, 5527, 5528, 5529, 5976, 7919, 8189, 8731, 8732, 8761, 9775, 9887, 9939, 10250, 10284, 10767, 10898, 10914, 10921, 11051, 11052, 22916, 22985, 23049, 23381, 26019, 26528, 26986, 28227, 29101, 29107, 51585, 51692, 53918, 53981, 55012, 55110, 55339, 55844, 55916, 55998, 56000, 64895, 651…								rs10004741, rs10008635, rs10008835, rs10009368, rs10011855, rs10013441, rs10013928, rs10018126, rs10029269, rs10029804, rs10029953, rs10037715, rs10042348, rs10044460, rs10045722, rs10049821, rs10056782, rs10061370, rs10064799, rs10067693, rs10073397, rs10076854, rs10077207, rs1007836, rs1008974, rs1008975, rs1011403, rs10135561, rs10135821, rs1014021, rs10145969, rs10146370, rs10148041, rs101520…
Base excision repair	interaction, ultra	39	0.0322064	6/34	0.424	5423, 5424, 10714, 27343, 79661, 252969								rs1043180, rs10793091, rs10793092, rs10899024, rs11236133, rs11236173, rs11236181, rs11236187, rs11236188, rs11236190, rs1433972, rs1466785, rs1534862, rs17810889, rs1787091, rs1874546, rs2186955, rs2645444, rs2645446, rs2740444, rs3095802, rs3127245, rs3219341, rs645541, rs6474390, rs6592575, rs659581, rs663016, rs663555, rs674306, rs675450, rs676537, rs7106219, rs7113533, rs7182283, rs7943085, …
B cell receptor signaling pathway	interaction, medium	1061	0.0326065	57/75	1.141e-31	207, 208, 695, 933, 971, 974, 1147, 1380, 2885, 2932, 3551, 3635, 3845, 4067, 4790, 4792, 4793, 4893, 5295, 5336, 5530, 5532, 5533, 5534, 5579, 5594, 5604, 5879, 5880, 6654, 6655, 6850, 7409, 7410, 8503, 8915, 10000, 10451, 11261, 23533, 27071, 29760, 63928, 84433, 118788								rs10005711, rs10011961, rs10030362, rs10031159, rs10031708, rs10037187, rs10040640, rs10043473, rs10056163, rs10064315, rs10070943, rs10071585, rs10075612, rs10078240, rs10089762, rs10100561, rs1011185, rs10114465, rs10114624, rs10119727, rs10132268, rs1013316, rs10145260, rs1014632, rs10147603, rs10204958, rs10210302, rs10218891, rs10229652, rs10240660, rs10241890, rs10252183, rs10267119, rs1027…
Basal transcription factors	pathway	299	0.0330066	37/54	1.707e-18	902, 1022, 2068, 2071, 2957, 2958, 2959, 2960, 2961, 2962, 2963, 2965, 2967, 2968, 2969, 4331, 6873, 6874, 6875, 6878, 6879, 6880, 6882, 6883, 6884, 6908, 8148, 9519, 9569, 27097, 51616, 54457, 83860, 129685, 138474, 387332, 404672								rs10079980, rs10096846, rs10108071, rs10108101, rs10108322, rs10138608, rs10150596, rs10150617, rs10503871, rs10503872, rs10514297, rs1064134, rs10752123, rs10752124, rs10795579, rs10795580, rs10805851, rs10813840, rs10813843, rs10813853, rs10813864, rs10888229, rs10905236, rs10916526, rs10916527, rs10922510, rs10948011, rs11024625, rs11071467, rs1115979, rs11255379, rs11255393, rs11255418, rs112…
Chemokine signaling pathway	interaction, high	2366	0.0330066	150/189	1.627e-86	157, 207, 208, 643, 673, 998, 1147, 1230, 1232, 1233, 1234, 1235, 1236, 1237, 1398, 1399, 1524, 2268, 2786, 2787, 2788, 2791, 2793, 2829, 2868, 2869, 2870, 2885, 2919, 2920, 2932, 3055, 3551, 3576, 3577, 3579, 3702, 3717, 3718, 4067, 4283, 4790, 4792, 4793, 5058, 5196, 5197, 5295, 5330, 5331, 5332, 5473, 5567, 5568, 5594, 5604, 5613, 6093, 6346, 6347, 6348, 6351, 6352, 6354, 6355, 6356, 6357, 635…								rs10000203, rs10000241, rs10006360, rs1000927, rs10012879, rs10016230, rs1002084, rs10037187, rs10038760, rs10040640, rs10043473, rs10054204, rs10056163, rs10064315, rs10070943, rs10071585, rs10075612, rs1007662, rs10078240, rs10079961, rs1008454, rs1008673, rs10089762, rs10100561, rs10116352, rs10119004, rs10119727, rs10131301, rs10132268, rs10138800, rs1014157, rs1014638, rs10147603, rs10147986…
Cysteine and methionine metabolism	interaction, ultra	399	0.0336067	6/36	0.4817	262, 1036, 27430, 29947, 51074, 259307								rs10035923, rs10036020, rs10037398, rs10038480, rs10040860, rs10043595, rs10043887, rs10044138, rs10045204, rs10045246, rs10045267, rs10045546, rs10050717, rs1005164, rs10055339, rs10055514, rs10055677, rs10057217, rs10057889, rs10058433, rs10060573, rs10060669, rs10063607, rs10064772, rs10068788, rs10071045, rs10071625, rs10072565, rs10073086, rs10077053, rs10077863, rs10080124, rs1017213, rs101…
Fanconi anemia pathway	characteristic	208	0.0338068	21/54	0.001785	2175, 2176, 2177, 2178, 2187, 2188, 7398, 9894, 11201, 22909, 29089, 51426, 51455, 55215, 57599, 57697, 79728, 80010, 83990, 84126, 116028								rs10163148, rs10163438, rs10172752, rs1018119, rs10186223, rs1027710, rs10438771, rs10451012, rs10465178, rs10500928, rs10510698, rs10515211, rs10821455, rs10868107, rs10868108, rs10889325, rs10993531, rs11026626, rs11026630, rs11026663, rs11026697, rs11074989, rs11140385, rs11140449, rs11140486, rs11140489, rs1115113, rs11640295, rs11750595, rs11860060, rs12025429, rs12034108, rs120963, rs121262…
p53 signaling pathway	pathway	1235	0.034807	62/69	5.976e-43	317, 355, 472, 545, 575, 595, 637, 836, 841, 842, 891, 894, 896, 898, 900, 901, 983, 1017, 1019, 1021, 1026, 1029, 1111, 1643, 1647, 3479, 3486, 3732, 4193, 4194, 4616, 5054, 5268, 5366, 5728, 6241, 6477, 7057, 7157, 7161, 7249, 8493, 8795, 9134, 9538, 9540, 10912, 11200, 25898, 27244, 50484, 51246, 51512, 54205, 55240, 56475, 63970, 64065, 64326, 64393, 83667, 143686								rs10010146, rs10012774, rs10017165, rs10018010, rs10018359, rs10025816, rs10026129, rs1002777, rs10030957, rs1003187, rs10034292, rs1003827, rs10052742, rs10060022, rs10067186, rs1007573, rs10082812, rs10085433, rs10093425, rs10164711, rs10172694, rs1017585, rs10176060, rs10176073, rs10188745, rs10189720, rs10196515, rs1019731, rs10207668, rs10225606, rs10230949, rs10233251, rs10234981, rs1023569…
African trypanosomiasis	pathway	782	0.0404081	28/35	2.944e-17	355, 356, 2150, 2776, 3040, 3043, 3458, 3553, 3569, 3586, 3592, 3593, 3606, 3620, 3910, 4615, 5330, 5331, 5332, 5578, 5579, 5582, 6401, 7124, 7412, 8542, 23236, 169355								rs1003199, rs1003586, rs10089533, rs10099877, rs1010544, rs1013316, rs1014632, rs1022596, rs10255691, rs10263896, rs1030828, rs1040496, rs10451280, rs10458360, rs10485720, rs10485723, rs10485727, rs10485728, rs10491174, rs10491200, rs10492201, rs10493934, rs10493936, rs10499563, rs10504014, rs10509561, rs10512065, rs10512067, rs10512513, rs1055044, rs1076637, rs10780227, rs10781474, rs10784640, r…
Endometrial cancer	interaction, high	435	0.0406081	43/52	5.983e-27	207, 208, 572, 673, 1956, 2064, 2885, 2932, 3611, 5295, 5594, 5604, 5728, 7157, 8312, 8313, 8503, 10000, 23533								rs10037187, rs10040640, rs10043473, rs10056163, rs10064315, rs10070943, rs10071585, rs10075612, rs10078240, rs10244108, rs10244133, rs10256393, rs10281173, rs1034992, rs10430641, rs10487888, rs10488140, rs10488142, rs10509533, rs10514764, rs10515052, rs10515058, rs10515062, rs10515070, rs10515086, rs1076094, rs10788581, rs10803158, rs10803171, rs10805422, rs10805425, rs10899766, rs10927039, rs109…
Endocrine and other factor-regulated calcium reabsorption	pathway	1442	0.0410082	44/49	9.036e-31	112, 115, 160, 161, 163, 476, 477, 480, 481, 482, 483, 486, 490, 624, 793, 1175, 1211, 1213, 1759, 1785, 2099, 2776, 2778, 3816, 3817, 5330, 5331, 5332, 5567, 5568, 5578, 5579, 5582, 5613, 6546, 7421, 8218, 8766, 9365, 10059, 23236, 23439, 26052, 56302								rs1002671, rs1003617, rs10048831, rs1005077, rs1005213, rs10086980, rs10088137, rs10088826, rs1010544, rs10111402, rs1011731, rs1012311, rs10132489, rs1013316, rs10140368, rs10142830, rs10144552, rs1014632, rs10149714, rs10158235, rs10158839, rs1016379, rs10168228, rs10170610, rs10170699, rs10175048, rs10175239, rs10179528, rs10180845, rs10183045, rs10183585, rs10184755, rs10193285, rs10195970, r…
Shigellosis	interaction, ultra	165	0.0436087	38/62	1.684e-16	998, 9844, 10092, 10109, 81873								rs1016321, rs1017148, rs10171839, rs10224438, rs10238916, rs10239693, rs10255208, rs10256450, rs10257460, rs10267165, rs10268319, rs10274668, rs10277512, rs10279544, rs10282309, rs1035582, rs1035690, rs10488021, rs10488031, rs1051358, rs1078496, rs10917139, rs10917145, rs10917148, rs10917152, rs10951500, rs10986471, rs11761717, rs11767227, rs11769038, rs11973001, rs12532031, rs12673355, rs1270154…
Galactose metabolism	interaction, medium	199	0.0458092	14/27	8.951e-06	231, 2548, 2595, 2683, 3906, 3938, 6476, 8972, 57016								rs10113903, rs1015204, rs10232478, rs10263438, rs1038810, rs1042712, rs10518763, rs1065765, rs10758189, rs10758198, rs10783269, rs10783270, rs10813950, rs10813951, rs10813957, rs10813959, rs1086089, rs1086090, rs1086092, rs10971388, rs10971406, rs10971412, rs10971418, rs1150433, rs1158037, rs11706837, rs11709545, rs11712177, rs11713450, rs11764581, rs1186530, rs11923878, rs12152254, rs12186083, r…
Adipocytokine signaling pathway	pathway	1258	0.0462092	60/69	1.002e-39	32, 207, 208, 948, 1147, 1374, 1375, 2180, 2181, 2182, 2475, 2538, 3551, 3667, 3717, 3952, 3953, 4790, 4792, 4793, 4852, 5105, 5106, 5443, 5465, 5562, 5563, 5564, 5565, 5588, 5599, 5601, 5602, 5781, 5970, 6256, 6257, 6258, 6513, 6517, 6774, 7124, 7133, 7186, 8471, 8660, 9021, 9370, 10000, 10645, 10891, 23205, 23305, 51422, 51703, 57818, 79602, 81616, 84254, 126129								rs10001480, rs10007750, rs10010833, rs10020457, rs10021219, rs10024003, rs10026060, rs10029339, rs10032829, rs10032937, rs10033283, rs10033885, rs1003634, rs1005592, rs10062565, rs10074987, rs10074991, rs1010447, rs10116352, rs10118518, rs10119004, rs1012731, rs10128072, rs10132268, rs1014677, rs10147603, rs1015249, rs10158279, rs10158937, rs1016331, rs10179260, rs10187044, rs10189760, rs10195273…
Mineral absorption	pathway	753	0.0476095	43/51	1.22e-27	475, 476, 477, 480, 481, 482, 483, 486, 490, 1181, 1317, 1811, 2495, 2512, 3162, 3163, 4490, 4494, 4496, 4501, 4502, 4891, 6523, 6546, 6550, 6556, 7018, 7421, 7779, 9843, 10568, 23439, 26872, 30061, 54822, 55503, 79901, 94033, 113235, 115019, 140803, 261729, 340024								rs1002671, rs1003617, rs10048831, rs1005077, rs1005213, rs10055235, rs10055403, rs10060236, rs10080150, rs1012311, rs10168228, rs10170610, rs10170699, rs10175048, rs10175239, rs10179528, rs10180845, rs10183045, rs10183585, rs10184755, rs10193285, rs10195970, rs10199504, rs1020208, rs10205005, rs10224488, rs10240262, rs10250598, rs1025303, rs10270950, rs10275313, rs1033806, rs1040502, rs1046995, r…
Basal cell carcinoma	interaction, medium	746	0.0478096	37/55	4.424e-18	650, 652, 1857, 2735, 2736, 2737, 2932, 5727, 7157, 7472, 7473, 7474, 7475, 7476, 7478, 7479, 7480, 7481, 7482, 7483, 7484, 8312, 8313, 8643, 27148, 51384, 51684, 54361, 64399, 80326, 81029, 89780								rs10029738, rs1003876, rs10049173, rs10129157, rs10132541, rs10136885, rs10137772, rs10144925, rs10147611, rs10151226, rs10193725, rs10229523, rs10234444, rs10237371, rs10241082, rs10241688, rs10241947, rs10242164, rs10244735, rs10248949, rs10258186, rs10263647, rs10270906, rs10279985, rs1034992, rs1040479, rs10441105, rs10485704, rs10486727, rs10488181, rs10488187, rs10512248, rs10514764, rs1077…
Dopaminergic synapse	pathway	3827	0.0486097	108/131	4.503e-50	111, 207, 208, 406, 409, 468, 773, 774, 775, 776, 801, 805, 808, 810, 815, 816, 817, 818, 1312, 1385, 1386, 1432, 1644, 1812, 1813, 1814, 1816, 2353, 2770, 2771, 2773, 2774, 2775, 2776, 2778, 2782, 2786, 2787, 2788, 2791, 2793, 2890, 2891, 2892, 2893, 2903, 2904, 2932, 3708, 3709, 3710, 3760, 3762, 3763, 3765, 3798, 3799, 3800, 4128, 4129, 5330, 5331, 5332, 5500, 5501, 5515, 5518, 5519, 5520, 552…								rs10000610, rs10000775, rs10001480, rs10004211, rs10005635, rs10005711, rs10009286, rs10011455, rs10011961, rs10012684, rs10015062, rs10015110, rs10023113, rs10024003, rs10026060, rs10029339, rs10030362, rs10031040, rs10031159, rs10031554, rs10033283, rs10035262, rs10035289, rs10037715, rs10045463, rs10050608, rs10052016, rs10053602, rs1005546, rs1005549, rs10056328, rs10056782, rs10057481, rs100…
Alzheimer's disease	pathway	2524	0.0492098	112/167	7.163e-52	102, 317, 351, 355, 489, 498, 509, 517, 518, 539, 572, 637, 775, 776, 779, 801, 805, 808, 810, 823, 824, 836, 840, 841, 842, 1020, 1327, 1337, 1345, 1350, 1351, 2081, 2597, 2776, 2903, 2904, 2905, 2906, 2932, 3416, 3553, 3708, 3709, 3710, 4023, 4035, 4137, 4311, 4694, 4696, 4697, 4698, 4700, 4702, 4704, 4705, 4706, 4710, 4712, 4716, 4718, 4719, 4720, 4723, 4724, 4725, 4726, 4728, 4729, 4731, 4842…								rs10005129, rs10005711, rs10011961, rs10030362, rs10031159, rs10040791, rs10051603, rs1005549, rs10065919, rs1006737, rs1007573, rs10092898, rs1012586, rs10128881, rs10132599, rs1013548, rs10140990, rs10153674, rs10161032, rs10161275, rs10164229, rs10172635, rs10178101, rs10179642, rs10181407, rs10194429, rs10195102, rs10202772, rs1020410, rs10207413, rs10215108, rs10225194, rs1022596, rs1025192,…
Ribosome	characteristic interaction, medium	33	0.0494099	11/92	0.8533	3921, 6135, 6171, 6201, 6228, 6233, 6234, 7311, 9045, 28998								rs1009966, rs10501481, rs10799802, rs11129832, rs11233280, rs11233281, rs11707278, rs11714912, rs12084240, rs13263962, rs1472401, rs1689512, rs1768158, rs1864480, rs1908920, rs2039845, rs2276871, rs4464383, rs4703879, rs4808137, rs4850007, rs4870730, rs510621, rs515495, rs558490, rs571479, rs631312, rs6545480, rs6806372, rs7005391, rs862242, rs862245, rs9968170

## Sheet: P-value filter 1.0E-3
Pathway	Analysis method	No of SNPs	P-value	PW Gene count	PW Enrichment p-value	Genes	SNPs
Allograft rejection	interaction, ultra	216	<=1.0E-06	30/39	6.801e-27	940, 941, 942, 958, 959, 3105, 3106, 3107, 3109, 3111, 3112, 3113, 3115, 3118, 3119, 3126, 3133, 3134, 3135, 3558, 3565, 3586, 3592, 3593								rs1003199, rs10174652, rs10193976, rs1034325, rs1044429, rs10490573, rs1059174, rs1063320, rs1077433, rs10866712, rs11119447, rs11689629, rs11926233, rs11928737, rs12012220, rs12191230, rs12556784, rs12613538, rs12635350, rs13032082, rs13032680, rs13064589, rs1354162, rs1366302, rs1512971, rs1554286, rs1569723, rs1610593, rs1611381, rs1611388, rs1611699, rs1611701, rs1611703, rs1611704, rs1611710…
Antigen processing and presentation	interaction, ultra	191	<=1.0E-06	37/78	7.044e-22	567, 920, 925, 926, 972, 3105, 3106, 3107, 3109, 3111, 3112, 3113, 3115, 3118, 3119, 3126, 3133, 3134, 3135, 3805, 3806, 3809, 3821, 3824, 5721, 5994, 8302								rs1005834, rs1034325, rs1044429, rs1055141, rs1059174, rs1063320, rs10734826, rs10734827, rs1075835, rs1075836, rs1075838, rs10772285, rs1077433, rs10774450, rs10845089, rs10849517, rs11053712, rs11053720, rs11053751, rs11053839, rs11084372, rs12191230, rs12370398, rs12520101, rs13023213, rs1322751, rs13409176, rs13409196, rs1374998, rs1398130, rs1398132, rs1515950, rs1571320, rs1606266, rs161059…
Autoimmune thyroid disease	pathway	457	<=1.0E-06	45/54	1.058e-42	355, 356, 940, 941, 942, 958, 959, 1081, 1493, 3002, 3105, 3106, 3107, 3109, 3111, 3112, 3113, 3115, 3118, 3119, 3126, 3133, 3134, 3135, 3439, 3440, 3441, 3442, 3443, 3444, 3445, 3447, 3448, 3449, 3451, 3452, 3558, 3565, 3567, 3586, 5551, 7038, 7173, 7252, 7253								rs1000263, rs10083503, rs10110664, rs10116540, rs10116615, rs10119678, rs10142999, rs10149689, rs10174652, rs10179639, rs10193976, rs10204515, rs1033363, rs1034325, rs1044429, rs10458360, rs10483286, rs10490573, rs10509561, rs1059174, rs1063320, rs10757219, rs1077433, rs10811497, rs10811519, rs10811523, rs10811525, rs10811527, rs10823579, rs10887911, rs10887918, rs10909625, rs10912276, rs10964878…
Epstein-Barr virus infection	interaction, high	1632	<=1.0E-06	85/204	4.771e-11	207, 208, 596, 683, 952, 953, 956, 958, 965, 983, 1017, 1147, 1380, 1432, 1457, 1459, 2208, 2268, 2932, 3066, 3105, 3106, 3107, 3113, 3115, 3118, 3119, 3126, 3133, 3134, 3135, 3551, 3586, 3587, 3588, 3654, 3683, 3716, 3718, 4067, 4790, 4792, 4793, 5295, 5335, 5336, 5567, 5568, 5599, 5601, 5602, 5603, 5606, 5608, 5610, 5613, 5714, 5757, 6416, 6693, 6774, 6850, 6885, 7128, 7157, 7185, 7297, 7514, 8…								rs10001480, rs10016073, rs10019008, rs10024003, rs10026060, rs10029339, rs10033283, rs10037187, rs10040640, rs10043473, rs10056163, rs10064315, rs10070943, rs10071585, rs10075612, rs10078240, rs10089762, rs10100561, rs1011170, rs10114465, rs10114624, rs10118357, rs10132268, rs1013996, rs1014573, rs10147603, rs1016379, rs10164912, rs10166046, rs10167875, rs10168639, rs10177619, rs10184747, rs10185…
Graft-versus-host disease	interaction, high	289	<=1.0E-06	28/43	6.049e-22	355, 940, 941, 942, 3002, 3105, 3106, 3107, 3109, 3111, 3112, 3113, 3115, 3118, 3119, 3126, 3133, 3134, 3135, 3552, 3553, 3558, 3569, 3821, 3824								rs10174652, rs10193976, rs10255691, rs10263896, rs1034325, rs1044429, rs10483286, rs10490573, rs10499563, rs10509561, rs1059174, rs1063320, rs10734826, rs10734827, rs10772285, rs1077433, rs10845089, rs10887911, rs10887918, rs10909625, rs10950917, rs10950919, rs11053712, rs11053720, rs11053751, rs11053839, rs11202972, rs11202989, rs1122913, rs11626395, rs11677416, rs11680809, rs11689629, rs1219123…
Herpes simplex infection	interaction, high	1166	<=1.0E-06	94/188	4.794e-18	355, 718, 727, 972, 983, 1017, 1147, 1457, 1459, 1616, 2969, 3105, 3106, 3107, 3109, 3111, 3112, 3113, 3115, 3118, 3119, 3126, 3133, 3134, 3135, 3150, 3439, 3440, 3441, 3442, 3443, 3444, 3445, 3447, 3448, 3449, 3451, 3452, 3454, 3455, 3456, 3459, 3460, 3551, 3553, 3569, 3592, 3593, 3716, 3717, 4615, 4790, 4792, 4793, 5599, 5601, 5602, 5610, 5781, 5818, 5819, 6041, 6347, 6352, 6429, 6430, 6431, 67…								rs10001480, rs10024003, rs10026060, rs10029339, rs1003199, rs10033283, rs1007369, rs1007530, rs1011170, rs10116271, rs10116352, rs10116540, rs10116615, rs10118357, rs10119004, rs10119678, rs10132268, rs1014573, rs10147603, rs1015249, rs10199181, rs1020322, rs1024467, rs10255691, rs10263017, rs10263896, rs10276962, rs1028593, rs1034325, rs10400584, rs1040817, rs1040818, rs1044429, rs10444338, rs10…
HTLV-I infection	pathway	4075	<=1.0E-06	214/268	2.341e-93	107, 108, 109, 111, 112, 113, 114, 115, 207, 208, 291, 292, 293, 324, 331, 466, 467, 468, 472, 545, 595, 598, 701, 894, 896, 915, 916, 958, 991, 996, 1019, 1026, 1029, 1031, 1111, 1147, 1385, 1386, 1387, 1437, 1499, 1739, 1857, 1869, 1870, 1871, 1958, 1959, 2005, 2033, 2113, 2114, 2224, 2353, 2535, 2932, 3105, 3106, 3107, 3109, 3111, 3112, 3113, 3115, 3118, 3119, 3126, 3133, 3134, 3135, 3551, 355…								rs10001480, rs10005711, rs1000578, rs10005921, rs10011961, rs10017471, rs10018583, rs10018731, rs10022682, rs10024003, rs10026060, rs10027814, rs10028496, rs10029339, rs10030362, rs10031159, rs10032067, rs10033283, rs10035541, rs10036787, rs10037187, rs10037963, rs10040640, rs10040756, rs10041351, rs10043473, rs10045904, rs1004765, rs10049173, rs10051671, rs10053044, rs10053149, rs10053728, rs100…
Jak-STAT signaling pathway	interaction, medium	1751	<=1.0E-06	126/155	6.7e-116	207, 208, 595, 598, 867, 868, 894, 896, 1154, 1271, 1439, 1440, 1441, 1489, 2056, 2057, 2688, 2689, 2690, 2885, 3439, 3440, 3441, 3442, 3443, 3444, 3445, 3447, 3448, 3449, 3451, 3452, 3454, 3455, 3456, 3458, 3459, 3460, 3467, 3558, 3559, 3560, 3562, 3565, 3566, 3568, 3569, 3570, 3572, 3574, 3575, 3578, 3586, 3587, 3588, 3592, 3593, 3594, 3595, 3596, 3597, 3598, 3716, 3717, 3718, 3952, 3953, 3976,…								rs1002655, rs1002656, rs1003199, rs10036224, rs10037187, rs10038062, rs10040640, rs10043473, rs10044080, rs10044838, rs10045084, rs1005017, rs10050597, rs10050889, rs10053847, rs10055279, rs10056163, rs10056553, rs10059243, rs10064315, rs10070418, rs10070943, rs10071384, rs10071585, rs10075612, rs10078240, rs10079816, rs10080135, rs1009231, rs10093522, rs10106730, rs10116352, rs10116540, rs101166…
Tumor viruses and cancer	pathway	2337	<=1.0E-06	153/207	1.099e-58	81, 87, 88, 89, 468, 572, 578, 595, 718, 836, 841, 890, 894, 896, 898, 983, 991, 998, 1017, 1019, 1021, 1026, 1027, 1029, 1111, 1232, 1233, 1234, 1237, 1385, 1386, 1387, 1654, 1739, 1959, 1960, 2033, 2885, 2934, 2957, 2958, 2959, 2960, 2961, 2965, 2967, 3066, 3105, 3106, 3107, 3133, 3134, 3135, 3249, 3516, 3572, 3716, 3718, 3725, 3845, 4055, 4067, 4193, 4790, 4792, 4893, 5290, 5291, 5293, 5294, 5…								rs10008046, rs1002169, rs1002170, rs10033468, rs10037187, rs1003827, rs10040640, rs10043473, rs10044080, rs10045084, rs10056163, rs10059243, rs10064315, rs10070943, rs10071585, rs10075612, rs10078240, rs1008531, rs10089762, rs1009145, rs10100561, rs10104039, rs1011185, rs10114465, rs10114624, rs10118357, rs10132268, rs10133111, rs10138608, rs10141794, rs10144464, rs1014638, rs10147603, rs10150596…
Type I diabetes mellitus	interaction, ultra	254	<=1.0E-06	28/45	3.794e-21	940, 941, 942, 1363, 3105, 3106, 3107, 3109, 3111, 3112, 3113, 3115, 3118, 3119, 3126, 3133, 3134, 3135, 3552, 3553, 3558, 3592, 3593								rs1003199, rs10050033, rs10174652, rs10193976, rs1034325, rs1044429, rs10490573, rs10517845, rs10517846, rs1059174, rs1063320, rs1077433, rs10866712, rs11677416, rs11680809, rs11689629, rs11724900, rs11728234, rs11728337, rs11732583, rs11926233, rs11928737, rs11940401, rs12191230, rs1246924, rs12613538, rs12635350, rs12642989, rs13032082, rs13032680, rs13064589, rs13102614, rs13109800, rs13111857…
Viral myocarditis	interaction, ultra	224	<=1.0E-06	35/72	3.248e-21	637, 857, 940, 941, 942, 958, 959, 1525, 1605, 3105, 3106, 3107, 3109, 3111, 3112, 3113, 3115, 3118, 3119, 3126, 3133, 3134, 3135, 3683, 6442, 54205								rs10174652, rs10193976, rs10227696, rs10276962, rs1034325, rs1044429, rs10490573, rs1049334, rs1050088, rs1059174, rs1063320, rs1077433, rs11689629, rs11911177, rs11971170, rs12012220, rs12100401, rs12191230, rs12451943, rs12556784, rs12613538, rs12700582, rs13032082, rs13032680, rs13064589, rs1354162, rs1569723, rs1610593, rs1611381, rs1611388, rs1611699, rs1611701, rs1611703, rs1611704, rs16117…
Hedgehog signaling pathway	pathway	1469	0.0006	50/56	1.422e-50	650, 652, 653, 654, 655, 656, 1452, 1454, 1455, 1456, 2619, 2735, 2736, 2737, 2932, 3549, 4036, 5567, 5568, 5613, 5727, 6469, 7472, 7473, 7474, 7475, 7476, 7478, 7479, 7480, 7481, 7482, 7483, 7484, 7546, 8643, 8945, 23291, 27148, 51384, 51684, 51715, 53944, 54361, 64399, 80326, 81029, 89780, 122011, 353500								rs10029738, rs10038345, rs1003876, rs10040841, rs10043440, rs1004434, rs10049173, rs10055109, rs10055291, rs10061285, rs10063876, rs10064428, rs10067312, rs10068589, rs10069013, rs10070979, rs10085115, rs1009390, rs10120212, rs10124274, rs10129157, rs10132541, rs10136885, rs10137772, rs10144925, rs10147611, rs10151226, rs1015985, rs1016379, rs10169232, rs10193725, rs10199676, rs10208728, rs102104…
Basal cell carcinoma	pathway	1284	0.00120024	49/55	1.798e-49	324, 650, 652, 1499, 1857, 2535, 2735, 2736, 2737, 2932, 5727, 6469, 6932, 6934, 7157, 7472, 7473, 7474, 7475, 7476, 7478, 7479, 7480, 7481, 7482, 7483, 7484, 7855, 7976, 8312, 8313, 8321, 8322, 8323, 8324, 8325, 8326, 8643, 11211, 27148, 51176, 51384, 51684, 54361, 64399, 80326, 81029, 83439, 89780								rs10029738, rs1003876, rs10049173, rs10055448, rs10069134, rs1009390, rs1009609, rs1012579, rs10128675, rs10129157, rs10132541, rs10136885, rs10137772, rs10144925, rs10147611, rs10151226, rs10165984, rs10174520, rs10193725, rs10205484, rs10229523, rs10234444, rs10237371, rs10241082, rs10241688, rs10241947, rs10242164, rs10242792, rs10243298, rs10244735, rs10244786, rs10248949, rs10249530, rs10250…
Tuberculosis	interaction, ultra	426	0.00120024	115/182	1.089e-84	537, 572, 637, 718, 805, 820, 972, 1509, 2207, 2212, 3109, 3111, 3112, 3113, 3115, 3118, 3119, 3126, 3439, 3440, 3441, 3442, 3443, 3444, 3445, 3447, 3448, 3449, 3451, 3452, 3456, 3459, 3460, 3552, 3553, 3569, 3586, 3587, 3588, 3592, 3593, 3606, 3684, 3687, 3716, 3920, 3929, 4046, 5994, 8844, 8877, 10332, 22925, 26253, 30835, 51561, 54205, 64581								rs1003199, rs10116540, rs10116615, rs10119678, rs10153674, rs10172635, rs10196882, rs10255691, rs10263896, rs10276962, rs1044429, rs10494355, rs10499563, rs1058867, rs10757178, rs10757181, rs10757219, rs10770850, rs10811497, rs10811519, rs10811523, rs10811525, rs10811527, rs10841879, rs10853147, rs10854364, rs10866712, rs10889503, rs10889504, rs10929965, rs10950917, rs10950919, rs10964856, rs1096…
Cytokine-cytokine receptor interaction	pathway	3890	0.00140028	216/265	2.55e-201	90, 91, 92, 93, 355, 356, 608, 643, 650, 655, 657, 658, 659, 943, 944, 958, 959, 970, 1230, 1232, 1233, 1234, 1235, 1236, 1237, 1271, 1435, 1436, 1437, 1439, 1440, 1441, 1489, 1524, 1896, 1950, 1956, 2056, 2057, 2277, 2321, 2322, 2324, 2688, 2689, 2690, 2829, 2919, 2920, 3082, 3439, 3440, 3441, 3442, 3443, 3444, 3445, 3447, 3448, 3449, 3451, 3452, 3454, 3455, 3456, 3458, 3459, 3460, 3467, 3552, 3…								rs10000203, rs10000241, rs10005096, rs1000515, rs10005450, rs10006293, rs10006360, rs10006747, rs10008126, rs10012879, rs10016230, rs10017471, rs10017970, rs10018731, rs10018945, rs1002084, rs10022682, rs10023994, rs1002655, rs1002656, rs10027656, rs10027875, rs10029166, rs10029654, rs10029718, rs1003199, rs10033375, rs10036224, rs10038062, rs10038760, rs10044080, rs10044838, rs10045084, rs100496…
Chemokine signaling pathway	interaction, high	2353	0.00160032	135/189	1.078e-110	157, 207, 208, 643, 673, 998, 1147, 1230, 1232, 1233, 1234, 1235, 1236, 1237, 1398, 1399, 1524, 2268, 2786, 2787, 2788, 2791, 2793, 2829, 2868, 2869, 2870, 2885, 2919, 2920, 2932, 3055, 3551, 3576, 3577, 3579, 3702, 3717, 3718, 4067, 4283, 4790, 4792, 4793, 5058, 5196, 5197, 5295, 5330, 5331, 5332, 5473, 5567, 5568, 5594, 5604, 5613, 6093, 6346, 6347, 6348, 6351, 6352, 6354, 6355, 6356, 6357, 635…								rs10000203, rs10000241, rs10006360, rs1000927, rs10012879, rs10016230, rs1002084, rs10037187, rs10038760, rs10040640, rs10043473, rs10054204, rs10056163, rs10064315, rs10070943, rs10071585, rs10075612, rs1007662, rs10078240, rs10079961, rs1008454, rs1008673, rs10089762, rs10100561, rs10116352, rs10119004, rs10119727, rs10131301, rs10132268, rs10138800, rs1014157, rs1014638, rs10147603, rs10147986…
Staphylococcus aureus infection	interaction, ultra	138	0.00360072	23/56	1.709e-12	718, 727, 728, 2204, 2212, 3109, 3111, 3112, 3113, 3115, 3118, 3119, 3126, 3586, 3683, 3684, 4153, 6403, 6404								rs10116271, rs1044429, rs10494355, rs10733650, rs10739585, rs10760135, rs10800462, rs10824381, rs10824779, rs10824784, rs10853782, rs10919203, rs10985112, rs10985126, rs10985127, rs11002340, rs11003040, rs11003084, rs11003114, rs11114011, rs11119447, rs11150610, rs11569501, rs11569507, rs11569511, rs11569536, rs11569538, rs11598427, rs11672983, rs11673207, rs1179766, rs1194659, rs1194662, rs11946…
T cell receptor signaling pathway	interaction, high	1578	0.00680136	90/108	1.235e-84	207, 208, 867, 868, 915, 916, 919, 920, 925, 926, 940, 959, 998, 1019, 1147, 1326, 1432, 1493, 1739, 2534, 2885, 2932, 3551, 3558, 3565, 3586, 3702, 3932, 3937, 4690, 4790, 4792, 4793, 5058, 5062, 5063, 5295, 5335, 5594, 5601, 5603, 5604, 5788, 6885, 7006, 7409, 7410, 7535, 8440, 8503, 8915, 9020, 9402, 10000, 10298, 10451, 23533, 23624, 27040, 29851, 56924, 57144, 84433								rs10037187, rs10040640, rs10043473, rs1004725, rs10050695, rs10056163, rs1005834, rs10064315, rs10068619, rs10070943, rs10071585, rs10075612, rs10078240, rs10079961, rs1011170, rs10119727, rs10132268, rs1014573, rs10147603, rs10172481, rs10174652, rs10179639, rs10180136, rs10180552, rs10180781, rs10182846, rs10193976, rs10194269, rs10198057, rs1020322, rs10203692, rs1022649, rs10229652, rs1024066…
Toxoplasmosis	interaction, ultra	530	0.0080016	90/133	2.494e-70	572, 958, 959, 3109, 3111, 3112, 3113, 3115, 3118, 3119, 3126, 3459, 3460, 3586, 3587, 3588, 3592, 3593, 3716, 5319, 5320, 5322, 6885, 7297, 8681, 23533, 26279, 30814, 54205, 64600, 81579, 84647, 345611, 391013								rs1003199, rs1011170, rs1014573, rs1020322, rs10276962, rs1040817, rs1040818, rs1044429, rs10455175, rs10485365, rs10485371, rs10485404, rs10498972, rs10498974, rs10498977, rs10498978, rs10498982, rs1058867, rs10753482, rs10799612, rs10806443, rs10806445, rs10854364, rs10866712, rs10889503, rs10889504, rs10916679, rs10916685, rs10916711, rs10944485, rs10944560, rs10944606, rs10944640, rs11000486,…
RNA transport	characteristic	773	0.00820164	67/153	7.285e-36	1207, 1967, 1968, 1974, 1983, 2332, 5903, 5905, 6612, 6613, 7341, 8087, 8487, 8563, 8661, 8662, 8664, 8665, 8666, 8891, 8892, 8893, 8894, 9631, 9669, 9688, 9818, 9972, 10073, 10289, 10419, 10460, 10605, 10762, 11097, 11102, 11171, 11218, 11260, 23165, 23225, 23279, 23511, 25929, 50628, 51095, 51808, 53371, 54960, 55520, 55706, 55746, 57122, 57510, 60528, 79023, 79760, 79833, 79897, 80145, 81929, …								rs1005451, rs10059993, rs10063061, rs1010303, rs1011927, rs1012545, rs10145743, rs10153318, rs1015361, rs10166594, rs10168517, rs10173357, rs10174893, rs10176091, rs10176508, rs10176567, rs10176594, rs10183564, rs10188396, rs10190171, rs10190898, rs1019265, rs1019283, rs10197130, rs10202074, rs10203961, rs10204803, rs10207503, rs10209275, rs10209643, rs10221121, rs10224307, rs10232205, rs1023576,…
Rheumatoid arthritis	interaction, ultra	321	0.00840168	49/92	1.395e-31	537, 940, 941, 942, 1435, 1493, 2321, 3109, 3111, 3112, 3113, 3115, 3118, 3119, 3126, 3552, 3553, 3569, 3605, 3606, 3683, 4312, 4314, 5228, 7422, 8600, 8792, 10673, 51561								rs10174652, rs10179639, rs10193976, rs1022926, rs10255691, rs10263896, rs1034375, rs1044429, rs10484879, rs10484881, rs10490573, rs10499563, rs10507513, rs10507514, rs10507516, rs10950917, rs10950919, rs11069734, rs11102019, rs11171806, rs11225429, rs11225434, rs1122913, rs11571292, rs11571293, rs11571304, rs11577194, rs11618877, rs11677416, rs11680809, rs11689629, rs12089727, rs12165104, rs12191…
Butanoate metabolism	characteristic interaction, ultra	4	0.00880176	2/30	0.6558	79944								rs4901000, rs4901008, rs737077, rs910641
Osteoclast differentiation	interaction, high	1493	0.00880176	88/128	1.008e-69	207, 208, 695, 814, 1147, 1432, 1435, 1436, 1535, 2212, 2534, 2885, 3454, 3455, 3456, 3459, 3460, 3551, 3552, 3553, 3554, 3716, 3932, 3937, 4689, 4790, 4792, 4982, 5295, 5336, 5594, 5599, 5601, 5602, 5603, 5604, 5608, 6772, 6850, 6885, 7006, 7046, 7048, 7297, 8503, 8600, 8651, 8792, 9020, 9021, 9846, 10000, 10326, 10990, 11006, 11024, 11026, 11027, 23533, 23547, 29760, 55423, 79168, 140885								rs10001480, rs10024003, rs10026060, rs10029339, rs10033283, rs10037187, rs10040249, rs10040640, rs10043473, rs10050695, rs10056163, rs10064315, rs10068619, rs10070943, rs10071585, rs10075612, rs10078240, rs1007837, rs1010101, rs1011170, rs10112537, rs10114465, rs10114624, rs10132268, rs1013996, rs1014573, rs10147603, rs1019855, rs10199181, rs1020322, rs1022649, rs1022926, rs1028593, rs1036097, rs…
Natural killer cell mediated cytotoxicity	interaction, high	1063	0.00920184	106/137	3.984e-93	355, 637, 673, 919, 962, 2207, 2534, 2885, 3002, 3105, 3106, 3107, 3133, 3135, 3439, 3440, 3441, 3442, 3443, 3444, 3445, 3447, 3448, 3449, 3451, 3452, 3454, 3455, 3456, 3459, 3460, 3683, 3805, 3806, 3809, 3821, 3824, 3932, 3937, 4068, 4277, 5058, 5295, 5335, 5336, 5594, 5604, 5781, 6452, 6850, 7409, 7410, 7535, 8503, 8743, 8793, 8794, 8795, 8797, 9436, 10451, 22914, 23533, 25759, 27040, 51744, 53…								rs10037187, rs10040640, rs10043473, rs10050695, rs10056163, rs10064315, rs10068619, rs10070943, rs10071585, rs10075612, rs1007662, rs10078240, rs10102276, rs10111172, rs10114465, rs10114624, rs10116540, rs10116615, rs10119678, rs10119727, rs1015249, rs1022649, rs10244133, rs1024467, rs10281173, rs1034325, rs10400584, rs10443202, rs10457852, rs10483286, rs10487888, rs10494080, rs10494081, rs104940…
Galactose metabolism	pathway	549	0.00940188	23/27	8.281e-23	231, 2538, 2548, 2585, 2595, 2645, 2683, 2717, 2720, 3098, 3099, 3101, 3906, 3938, 5211, 5213, 5214, 5236, 6476, 7360, 8972, 55276, 57016, 57818, 80201								rs10028206, rs10047370, rs10113903, rs1015204, rs10232478, rs1023431, rs10263438, rs1027793, rs1032206, rs1038810, rs1041598, rs1042712, rs10466265, rs10493350, rs1049392, rs10496195, rs10517423, rs10518763, rs1053000, rs1065765, rs10751831, rs10751864, rs10751876, rs10751884, rs10751898, rs10758189, rs10758198, rs10762277, rs10783269, rs10783270, rs10789146, rs10794818, rs10794864, rs10794865, r…
Asthma	pathway	99	0.00960192	23/31	2.761e-20	958, 959, 2205, 2206, 2207, 3109, 3111, 3112, 3113, 3115, 3118, 3119, 3126, 3562, 3565, 3567, 3578, 3586, 3596, 5553, 6037, 6356, 8288								rs1044429, rs10489849, rs10853004, rs10896615, rs11119447, rs11230161, rs12012220, rs12119226, rs12135788, rs12191230, rs12556784, rs12656759, rs1303621, rs1554286, rs1569723, rs16969449, rs16969457, rs17132324, rs17169344, rs17169348, rs17254457, rs17330906, rs175737, rs176248, rs17666424, rs181781, rs1883834, rs1883835, rs20541, rs2069757, rs2181135, rs2227282, rs2227284, rs2243218, rs2243248, …
Drug metabolism	characteristic interaction, ultra	3	0.00960192	1/51	1	7172								rs11964408, rs2842950, rs2859778
Leishmaniasis	interaction, ultra	460	0.0116023	51/73	2.458e-41	718, 1535, 2212, 3109, 3111, 3112, 3113, 3115, 3118, 3119, 3126, 3459, 3460, 3552, 3553, 3565, 3586, 3592, 3593, 3684, 3716, 6885								rs1003199, rs1011170, rs1014573, rs1020322, rs1040817, rs1040818, rs1044429, rs10455175, rs10485365, rs10485371, rs10485404, rs10494355, rs10498972, rs10498974, rs10498977, rs10498978, rs10498982, rs10806443, rs10806445, rs10866712, rs10889503, rs10889504, rs10944485, rs10944560, rs10944606, rs10944640, rs11119447, rs11150610, rs11208559, rs1124386, rs1126353, rs1126354, rs1143794, rs1144159, rs1…
Calcium signaling pathway	characteristic interaction, medium	1	0.0118024	57/177	1.177e-22	7125								rs386155
Cocaine addiction	pathway	1540	0.014803	39/50	2.575e-17	111, 468, 627, 1020, 1385, 1386, 1644, 1742, 1812, 1813, 2354, 2770, 2771, 2773, 2778, 2891, 2903, 2904, 2905, 2906, 2913, 3725, 4128, 4129, 4790, 5173, 5567, 5568, 5613, 5970, 6531, 6570, 6571, 8787, 9586, 64764, 84699, 90993, 116443								rs10000610, rs10004211, rs10011455, rs10031554, rs1003407, rs10052016, rs10053602, rs1005549, rs10057481, rs10057497, rs10069450, rs10070886, rs1010271, rs10107837, rs10115450, rs10116192, rs10120848, rs10123826, rs1012586, rs1013264, rs1013548, rs10159308, rs1016181, rs1016379, rs10172070, rs1017685, rs10180144, rs1018077, rs1018078, rs10218421, rs10219275, rs10224250, rs10225559, rs10225574, rs…
Pertussis	pathway	665	0.015203	60/75	5.277e-27	710, 712, 713, 716, 718, 722, 725, 727, 801, 805, 808, 810, 834, 836, 840, 929, 1072, 1073, 1432, 2353, 2770, 2771, 2773, 3394, 3552, 3553, 3569, 3576, 3586, 3592, 3593, 3654, 3659, 3678, 3684, 3688, 3689, 3725, 4615, 4790, 4843, 5594, 5599, 5601, 5602, 5603, 5970, 6372, 6374, 7099, 7189, 10392, 23643, 51135, 51561, 51806, 114548, 114609, 148022, 353376								rs10001480, rs10024003, rs10026060, rs10029339, rs1003199, rs10033283, rs10116271, rs10129564, rs10132599, rs10132979, rs10133192, rs10135572, rs10139660, rs10151959, rs10153674, rs10159308, rs10172635, rs10229737, rs10241877, rs10244538, rs10255691, rs10263896, rs10268519, rs10274707, rs10277713, rs1032596, rs10399826, rs1046864, rs10480799, rs10494890, rs10499563, rs10499847, rs10509984, rs1051…
Influenza A	characteristic	133	0.0154031	118/176	1.79e-91	3267, 3836, 5045, 10625, 11100, 56649, 84000, 91543								rs10127540, rs10160375, rs10185822, rs10189795, rs10421990, rs10736490, rs10736491, rs10750123, rs10750124, rs10752951, rs10790230, rs10798024, rs10892188, rs10892208, rs10892209, rs10911722, rs10911723, rs10911725, rs10911726, rs10911755, rs10929456, rs10933188, rs10934602, rs11216607, rs11216647, rs11216666, rs11216674, rs11216700, rs11216702, rs11216703, rs11216705, rs11216706, rs11216740, rs1…
Intestinal immune network for IgA production	interaction, ultra	274	0.0154031	33/49	2.345e-26	608, 940, 941, 942, 958, 959, 3109, 3111, 3112, 3113, 3115, 3118, 3119, 3126, 3558, 3565, 3569, 3586, 4055, 5284, 10673, 23308, 23495, 29851, 57379								rs10172481, rs10174652, rs10180136, rs10180781, rs10193976, rs10255691, rs10263896, rs1044429, rs10490573, rs10499563, rs10770847, rs10770856, rs10841875, rs10932036, rs10932038, rs10932047, rs10932049, rs10932053, rs10932058, rs10950917, rs10950919, rs11064153, rs11069734, rs11119447, rs1122913, rs11571300, rs11618877, rs11656859, rs11689629, rs11690070, rs11884257, rs12012220, rs12105515, rs121…
Measles	interaction, medium	1832	0.0174035	113/134	1.667e-107	103, 207, 208, 355, 356, 595, 868, 894, 896, 898, 915, 916, 940, 1017, 1019, 1021, 1147, 1457, 1459, 1796, 2534, 2932, 3305, 3306, 3312, 3439, 3440, 3441, 3442, 3443, 3444, 3445, 3447, 3448, 3449, 3451, 3452, 3454, 3455, 3456, 3458, 3459, 3460, 3552, 3553, 3558, 3559, 3560, 3565, 3569, 3592, 3593, 3596, 3654, 3716, 3717, 3718, 4068, 4599, 4615, 4790, 4792, 4793, 4938, 4939, 4940, 5295, 5588, 5610…								rs1003199, rs10037187, rs1003827, rs10040640, rs10043473, rs10056163, rs10064315, rs10070943, rs10071585, rs10075612, rs10078240, rs10102276, rs10111172, rs1011170, rs10116352, rs10116540, rs10116615, rs10119004, rs10119678, rs10132268, rs1014573, rs10147603, rs10151495, rs10168354, rs10174652, rs10193976, rs10194748, rs10199181, rs1020322, rs10203484, rs10208470, rs1022649, rs10230949, rs1023498…
NOD-like receptor signaling pathway	pathway	874	0.0214043	46/59	4.25e-41	330, 834, 838, 841, 1147, 1432, 2919, 2920, 3320, 3326, 3551, 3553, 3569, 3576, 3606, 4210, 4790, 4792, 4793, 5594, 5599, 5601, 5602, 5603, 5970, 6347, 6352, 6885, 7128, 7184, 7189, 8767, 9051, 10392, 10454, 22861, 22900, 23118, 55914, 58484, 59082, 64127, 84674, 114548, 257397								rs10001480, rs1001676, rs10024003, rs10026060, rs10029339, rs10033283, rs10055584, rs10057505, rs10087008, rs10103760, rs10106118, rs1011170, rs1012116, rs10132268, rs1013276, rs1013277, rs1014573, rs10147603, rs1018281, rs1020322, rs1022197, rs1022198, rs10255691, rs10263896, rs1028593, rs10399826, rs10406657, rs10407902, rs1040817, rs1040818, rs10410339, rs10420505, rs10421339, rs10429371, rs10…
Ribosome	characteristic interaction, ultra	1	0.0216043	1/92	0.9991	6171								rs1689512
Systemic lupus erythematosus	interaction, ultra	197	0.0222044	48/138	6.887e-21	718, 727, 940, 941, 942, 958, 959, 2212, 3109, 3111, 3112, 3113, 3115, 3118, 3119, 3126, 3586, 6738, 8335, 8344, 8347, 8353, 8355, 8358, 8360, 8364, 8365, 8367, 8968, 286436, 440093								rs10116271, rs10174652, rs10193976, rs1044429, rs10484434, rs10490573, rs10494355, rs10506080, rs10733650, rs10739585, rs10743769, rs10760135, rs10801173, rs10844025, rs10844055, rs10985112, rs10985126, rs10985127, rs11051588, rs11051643, rs11051695, rs11119447, rs1150966, rs1150990, rs11569501, rs11569507, rs11569511, rs11569536, rs11569538, rs11611197, rs11689629, rs11759720, rs1179766, rs12012…
Shigellosis	interaction, medium	736	0.0240048	39/62	3.292e-29	25, 391, 998, 1147, 1398, 1399, 1432, 1793, 2017, 3059, 3551, 3576, 3678, 4790, 4792, 4793, 5594, 5599, 5601, 5602, 5603, 5879, 6093, 6714, 7322, 8767, 8945, 9475, 9844, 10092, 10094, 10109, 10552, 23291, 81873								rs10001480, rs10024003, rs10026060, rs10029339, rs10033283, rs10040841, rs10061285, rs1006217, rs10064428, rs10067312, rs10068589, rs10069013, rs10087008, rs10103760, rs10106118, rs1012116, rs10132268, rs10147603, rs1016321, rs10167277, rs1017148, rs10171839, rs10198045, rs10205944, rs10218871, rs10224438, rs10238916, rs10239693, rs10255208, rs1025641, rs10256450, rs10257460, rs1026231, rs1026716…
Sphingolipid metabolism	pathway	912	0.0246049	34/40	4.032e-33	410, 427, 2531, 2581, 2629, 2717, 2720, 4759, 6609, 7357, 7368, 8560, 8611, 8612, 8613, 8877, 8879, 9331, 9514, 9517, 10558, 10825, 29956, 55304, 55331, 55512, 56624, 64781, 79603, 91012, 123099, 125981, 130367, 166929, 204219, 253782, 259230, 339221, 340485								rs10008418, rs10019345, rs10021742, rs1002666, rs10108779, rs10112857, rs10118371, rs10119829, rs10120186, rs10123805, rs10132895, rs10135955, rs10139003, rs10140584, rs10143139, rs10147424, rs10166668, rs10174987, rs10179586, rs10186450, rs10189316, rs10197969, rs1020572, rs10213347, rs1022560, rs1022561, rs1023431, rs1029340, rs1030561, rs1039296, rs10485759, rs10489776, rs10490964, rs10493186,…
TGF-beta signaling pathway	pathway	2019	0.025205	73/85	1.007e-70	90, 92, 93, 650, 652, 653, 654, 655, 656, 657, 658, 659, 1387, 1634, 1874, 1875, 2033, 3397, 3398, 3399, 3400, 3458, 3624, 3625, 3626, 4052, 4086, 4087, 4088, 4089, 4090, 4091, 4092, 4093, 4609, 4838, 5308, 5515, 5518, 5519, 5594, 5933, 5934, 6093, 6198, 6199, 6500, 6667, 7027, 7042, 7043, 7044, 7046, 7048, 7057, 7058, 7060, 8200, 8454, 8646, 9241, 9372, 9475, 9765, 9978, 10468, 10637, 57154, 647…								rs10000873, rs10003405, rs10005096, rs10005450, rs10008126, rs10015214, rs10018945, rs10027656, rs1003492, rs1004765, rs10049681, rs10050107, rs10056474, rs10064147, rs1007007, rs1007239, rs1007518, rs10083047, rs10083048, rs10096521, rs10104165, rs10106754, rs1012249, rs10129157, rs10132541, rs10136885, rs10137772, rs1014064, rs10144925, rs10147611, rs10151226, rs10155491, rs1015985, rs10162965,…
Phagosome	interaction, ultra	557	0.0254051	58/156	1.084e-26	537, 718, 948, 949, 1535, 1783, 2204, 2212, 3105, 3106, 3107, 3109, 3111, 3112, 3113, 3115, 3118, 3119, 3126, 3133, 3134, 3135, 3673, 3684, 3920, 4074, 4153, 4973, 6441, 7037, 7278, 10332, 10952, 22925, 23480, 29927, 30835, 51143, 53407, 55176, 64581, 78989, 81035								rs1000579, rs10009773, rs10017573, rs1006487, rs1009438, rs10115446, rs10121003, rs10196882, rs10210631, rs10212131, rs10215617, rs10238349, rs10244229, rs1030656, rs1034325, rs1044429, rs10492522, rs10494355, rs10516164, rs10516165, rs1053403, rs1059174, rs1063320, rs10760689, rs10773111, rs1077433, rs1078066, rs10788338, rs10819684, rs10824381, rs10824779, rs10824784, rs10845053, rs10846691, rs…
Homologous recombination	characteristic	149	0.0264053	10/28	1.442e-05	4683, 5890, 5892, 5893, 7516, 8438, 25788								rs10109454, rs10130919, rs10132294, rs10133262, rs10138140, rs10143455, rs10146321, rs10146772, rs10248434, rs10248766, rs10483810, rs10849605, rs10952367, rs10956914, rs11158719, rs11158730, rs11158757, rs11158758, rs11158762, rs11571435, rs11571468, rs11623355, rs11624164, rs11624166, rs11624333, rs11627646, rs11628653, rs11846344, rs11850191, rs12431919, rs1274643, rs12889206, rs12889666, rs12…
Bacterial invasion of epithelial cells	interaction, high	641	0.0276055	40/71	2.758e-27	857, 858, 859, 867, 868, 998, 1398, 1399, 2335, 2549, 3611, 3678, 5295, 6714, 8503, 9844, 10092, 10109, 23533, 23624, 25759, 26084, 53358, 81873, 399694								rs10037187, rs10040640, rs10043473, rs10056163, rs10064315, rs10070943, rs10071585, rs10075612, rs1007662, rs10078240, rs1016321, rs1017148, rs10171839, rs10172425, rs10199059, rs10201850, rs10202483, rs10209954, rs10224438, rs10227696, rs10228039, rs10238916, rs10239692, rs10239693, rs10255208, rs10256450, rs10257460, rs10267165, rs10268319, rs10274668, rs10277512, rs10279544, rs10282309, rs1035…
B cell receptor signaling pathway	interaction, high	765	0.0312062	57/75	1.496e-49	207, 208, 695, 933, 971, 974, 1147, 1380, 2885, 2932, 3551, 3635, 4067, 4790, 4792, 4793, 5295, 5336, 5594, 5604, 6850, 7409, 7410, 8503, 8915, 10000, 10451, 23533, 27071, 29760, 84433, 118788								rs10031708, rs10037187, rs10040640, rs10043473, rs10056163, rs10064315, rs10070943, rs10071585, rs10075612, rs10078240, rs10089762, rs10100561, rs10114465, rs10114624, rs10119727, rs10132268, rs10147603, rs10210302, rs10218891, rs10229652, rs10240660, rs10241890, rs10252183, rs10267119, rs1027986, rs10280353, rs1028593, rs10443202, rs10487884, rs10491067, rs10493763, rs10494080, rs10494081, rs104…
Melanogenesis	pathway	2530	0.0312062	90/101	2.314e-90	107, 108, 109, 111, 112, 113, 114, 115, 434, 801, 805, 808, 810, 815, 816, 817, 818, 1385, 1387, 1499, 1638, 1857, 1906, 1910, 2033, 2535, 2770, 2771, 2773, 2775, 2776, 2778, 2932, 3815, 3845, 4157, 4254, 4286, 4893, 5330, 5331, 5332, 5443, 5567, 5568, 5578, 5579, 5582, 5594, 5604, 5613, 5894, 6932, 6934, 7299, 7306, 7472, 7473, 7474, 7475, 7476, 7478, 7479, 7480, 7481, 7482, 7483, 7484, 7855, 79…								rs10000775, rs10005635, rs10009286, rs10012684, rs1001497, rs10015062, rs10015110, rs10023113, rs10031040, rs10035541, rs10036787, rs10049173, rs10050608, rs10053728, rs10055448, rs10063966, rs10066581, rs10068942, rs10087741, rs10093375, rs10095393, rs10095524, rs1009609, rs10097218, rs10104127, rs1010544, rs10108431, rs1011185, rs10112018, rs10114316, rs10118338, rs10118714, rs1012579, rs101286…
Vasopressin-regulated water reabsorption	characteristic	34	0.0320064	20/44	4.955e-12	359, 360, 8655, 10671, 51626, 140735								rs10106278, rs10503863, rs10875989, rs10954971, rs11996929, rs12541729, rs16876889, rs17124174, rs17253713, rs181219, rs181224, rs184172, rs2526660, rs2585836, rs2585842, rs2938234, rs2958750, rs2958757, rs296741, rs3759125, rs3792008, rs3792009, rs3792020, rs3860985, rs4148196, rs461872, rs467199, rs540520, rs667913, rs6994064, rs7207440, rs7303233, rs787820, rs9303397
MAPK signaling pathway	characteristic	751	0.0322064	130/268	6.473e-76	1844, 1845, 1846, 1847, 1849, 1852, 3925, 4296, 4763, 5494, 5495, 5536, 5801, 5924, 6788, 8491, 8550, 9175, 9344, 9448, 9693, 11072, 11221, 23162, 23542, 51295, 51347, 56940, 57551, 80824, 84867, 115727								rs10004343, rs10008908, rs10011041, rs10011799, rs10016149, rs10017696, rs10021604, rs10022176, rs10025071, rs10025560, rs10027110, rs10031882, rs10050099, rs10099079, rs10099976, rs10099978, rs10105045, rs10110413, rs1012226, rs10142834, rs10171484, rs1017574, rs10180864, rs1018218, rs10194088, rs1020720, rs1020721, rs10208929, rs1024782, rs1026514, rs1031675, rs1033732, rs1034017, rs1034018, rs…
Toll-like receptor signaling pathway	characteristic interaction, high	1	0.0326065	81/102	6.817e-73	51311								rs5979785
Endocrine and other factor-regulated calcium reabsorption	interaction, ultra	38	0.0366073	16/49	1.745e-07	486, 9365								rs11216567, rs191924, rs211252, rs2320760, rs2858977, rs2858978, rs3848093, rs385564, rs479991, rs4941701, rs4942922, rs4942924, rs516306, rs540109, rs542624, rs553791, rs554634, rs562020, rs566514, rs571118, rs576404, rs648202, rs650439, rs659117, rs677332, rs684492, rs684868, rs7988462, rs9315193, rs9315202, rs9526838, rs9527023, rs9527024, rs9535698, rs9536313, rs9536368, rs9563081, rs9568680
Hematopoietic cell lineage	pathway	1026	0.0374075	69/88	1.769e-61	290, 909, 910, 912, 913, 914, 915, 916, 920, 921, 925, 926, 928, 929, 931, 933, 945, 947, 948, 951, 952, 960, 966, 1378, 1380, 1435, 1436, 1437, 1440, 1441, 1604, 1791, 2056, 2057, 2208, 2322, 2811, 2814, 2993, 3126, 3552, 3553, 3554, 3559, 3562, 3565, 3566, 3567, 3568, 3569, 3570, 3574, 3575, 3655, 3672, 3673, 3674, 3675, 3676, 3678, 3684, 3690, 3815, 4254, 4311, 7037, 7066, 7173, 7850								rs10016073, rs10019008, rs1002655, rs1002656, rs10029931, rs10044838, rs10053847, rs10057067, rs1005834, rs10093522, rs1009897, rs1010101, rs10106730, rs1015260, rs10204515, rs10205700, rs10217110, rs1025039, rs1025192, rs10255691, rs10263896, rs1035732, rs1038034, rs10412123, rs10419722, rs10429953, rs10434440, rs1047481, rs10488809, rs10488968, rs10491434, rs10494190, rs10499563, rs10504684, rs…
Acute myeloid leukemia	interaction, high	514	0.0384077	42/58	2.661e-35	207, 208, 572, 673, 861, 1147, 2322, 2475, 2885, 3551, 3815, 4790, 5292, 5295, 5594, 5604, 6198, 6199, 6774, 6776, 6777, 8503, 10000, 23533								rs10037187, rs10040640, rs10043473, rs10056163, rs10064315, rs1006639, rs10070943, rs10071585, rs10075612, rs10078240, rs1010447, rs1015602, rs10244133, rs1026916, rs10281173, rs1033335, rs10434440, rs10460712, rs10487888, rs10515052, rs10515058, rs10515062, rs10515070, rs10515086, rs1053005, rs1057079, rs1064261, rs1076094, rs10803158, rs10803171, rs10805422, rs10805425, rs10854374, rs10927039, …
ABC transporters	pathway	714	0.0386077	41/44	1.616e-43	19, 20, 21, 24, 215, 225, 368, 1080, 1244, 4363, 5243, 5244, 5825, 5826, 6833, 6890, 6891, 8647, 8714, 9429, 9619, 10057, 10060, 10257, 10349, 10350, 10351, 11194, 23456, 23457, 23460, 23461, 26154, 64137, 64240, 64241, 85320, 89845, 94160, 154664, 340273								rs1000002, rs1004301, rs1004302, rs1012371, rs1014235, rs10177417, rs10186294, rs10187636, rs10198064, rs10200158, rs10226404, rs10227179, rs10234192, rs10234238, rs10236551, rs10240195, rs10243683, rs1024598, rs10248242, rs10255612, rs10256255, rs10260049, rs10261964, rs10264990, rs10266329, rs10267753, rs10273407, rs10276036, rs10276319, rs10276916, rs10280101, rs10280418, rs10280481, rs1031219…
N-Glycan biosynthesis	characteristic	13	0.0472094	2/49	0.8829	91869								rs11242, rs11714876, rs2253675, rs2564921, rs2581790, rs2581799, rs2581830, rs3796351, rs6770152, rs7615099, rs7616077, rs7622420, rs9867023
SNARE interactions in vesicular transport	characteristic	221	0.0474095	19/36	5.658e-13	662, 6843, 8674, 8675, 8676, 8773, 9342, 9482, 9570, 10228, 10282, 10490, 10652, 10791, 51272, 55014, 116841, 143187								rs10120103, rs10121880, rs10123261, rs10215958, rs10217692, rs1022907, rs10248807, rs10257353, rs10264801, rs10487252, rs10494536, rs10509963, rs10509964, rs10518766, rs10521157, rs1052586, rs10797664, rs10798603, rs10819702, rs10819703, rs10885348, rs10885352, rs10885369, rs10885371, rs10885372, rs10885378, rs10910849, rs10913529, rs10916203, rs10953106, rs10953107, rs10953111, rs11064227, rs110…
Long-term potentiation	characteristic interaction, ultra	5	0.0478096	44/70	8.978e-33	5502								rs11170980, rs1144998, rs1145000, rs1157484, rs7297136
Sulfur metabolism	characteristic interaction, ultra	1	0.0478096	1/13	0.6279	6821								rs772923
Amoebiasis	interaction, high	1003	0.04981	57/106	7.599e-37	81, 87, 88, 89, 912, 929, 1511, 1992, 2335, 2919, 3553, 3554, 3569, 3576, 3586, 3592, 3593, 3684, 4790, 5055, 5269, 5272, 5273, 5275, 5295, 5330, 5331, 5332, 5567, 5568, 5613, 6317, 6318, 7097, 7099, 7850, 8503, 23236, 23533								rs1003199, rs10037187, rs10040640, rs10043473, rs10056163, rs10064315, rs10070943, rs10071585, rs10075612, rs10078240, rs1009145, rs10141794, rs1015416, rs10163726, rs1016379, rs10172425, rs10199059, rs10201850, rs10202483, rs10209954, rs10218421, rs1022596, rs10255691, rs10263896, rs1037215, rs1040496, rs10432530, rs10485720, rs10485723, rs10485727, rs10485728, rs10493750, rs10498037, rs10498039…

## Sheet: P-value filter 1.0E-4
Pathway	Analysis method	No of SNPs	P-value	PW Gene count	PW Enrichment p-value	Genes	SNPs
Allograft rejection	interaction, high	286	<=1.0E-06	29/39	2.806e-22	355, 940, 941, 942, 958, 959, 3002, 3105, 3106, 3107, 3109, 3111, 3112, 3113, 3115, 3118, 3119, 3126, 3133, 3134, 3135, 3558, 3565, 3586, 3592, 3593								rs1003199, rs10174652, rs10193976, rs1034325, rs1044429, rs10483286, rs10490573, rs10509561, rs1059174, rs1063320, rs1077433, rs10866712, rs10887911, rs10887918, rs10909625, rs11119447, rs11202972, rs11202989, rs11626395, rs11689629, rs11926233, rs11928737, rs12012220, rs12191230, rs12433772, rs12556784, rs12613538, rs12635350, rs12878495, rs12881813, rs13032082, rs13032680, rs13064589, rs1354162…
Antigen processing and presentation	interaction, ultra	204	<=1.0E-06	33/78	1.178e-14	567, 920, 925, 926, 972, 3105, 3106, 3107, 3109, 3111, 3112, 3113, 3115, 3118, 3119, 3126, 3133, 3134, 3135, 3805, 3806, 3809, 3821, 3824, 5721, 5994, 8302								rs1005834, rs1034325, rs1044429, rs1055141, rs1059174, rs1063320, rs10734826, rs10734827, rs1075835, rs1075836, rs1075838, rs10772285, rs1077433, rs10774450, rs10845089, rs10849517, rs11053712, rs11053720, rs11053751, rs11053839, rs11084372, rs12191230, rs12370398, rs12520101, rs13023213, rs1322751, rs13409176, rs13409196, rs1374998, rs1398130, rs1398132, rs1515950, rs1571320, rs1606266, rs161059…
Autoimmune thyroid disease	interaction, medium	361	<=1.0E-06	43/54	1.152e-34	355, 356, 940, 941, 942, 958, 959, 1081, 1493, 3002, 3105, 3106, 3107, 3109, 3111, 3112, 3113, 3115, 3118, 3119, 3126, 3133, 3134, 3135, 3439, 3440, 3441, 3442, 3443, 3444, 3445, 3447, 3448, 3449, 3451, 3452, 3558, 3565, 3586, 7252, 7253								rs10083503, rs10116540, rs10116615, rs10119678, rs10142999, rs10149689, rs10174652, rs10179639, rs10193976, rs1034325, rs1044429, rs10458360, rs10483286, rs10490573, rs10509561, rs1059174, rs1063320, rs10757219, rs1077433, rs10811497, rs10811519, rs10811523, rs10811525, rs10811527, rs10887911, rs10887918, rs10909625, rs10912276, rs10964878, rs10964882, rs10964930, rs10964981, rs10964985, rs110270…
Calcium signaling pathway	characteristic interaction, medium	2	<=1.0E-06	63/177	6.972e-22	7125, 80228								rs386155, rs4481505
Epstein-Barr virus infection	interaction, ultra	581	<=1.0E-06	35/204	0.953	683, 952, 958, 965, 2208, 3105, 3106, 3107, 3113, 3115, 3118, 3119, 3126, 3133, 3134, 3135, 3586, 3587, 3588, 3683, 3716, 3718, 5714, 5757, 6693, 6885, 7128, 7297, 7514, 8021, 10622, 11317, 23533, 26993, 55718								rs10016073, rs10019008, rs1011170, rs1014573, rs10166046, rs10167875, rs1020322, rs10204481, rs1034325, rs1040817, rs1040818, rs10455175, rs10485365, rs10485371, rs10485404, rs10488968, rs10498972, rs10498974, rs10498977, rs10498978, rs10498982, rs10499198, rs1050567, rs1058867, rs1059174, rs1063320, rs1077433, rs10806443, rs10806445, rs10854364, rs10871449, rs10889503, rs10889504, rs10924102, rs…
Graft-versus-host disease	interaction, ultra	245	<=1.0E-06	27/43	7.708e-18	940, 941, 942, 3105, 3106, 3107, 3109, 3111, 3112, 3113, 3115, 3118, 3119, 3126, 3133, 3134, 3135, 3552, 3553, 3558, 3569, 3821, 3824								rs10174652, rs10193976, rs10255691, rs10263896, rs1034325, rs1044429, rs10490573, rs10499563, rs1059174, rs1063320, rs10734826, rs10734827, rs10772285, rs1077433, rs10845089, rs10950917, rs10950919, rs11053712, rs11053720, rs11053751, rs11053839, rs1122913, rs11677416, rs11680809, rs11689629, rs12191230, rs12370398, rs12537614, rs12537965, rs12613538, rs12673996, rs13032082, rs13032680, rs1306458…
Herpes simplex infection	interaction, ultra	815	<=1.0E-06	60/188	0.0002813	718, 727, 972, 1616, 2969, 3105, 3106, 3107, 3109, 3111, 3112, 3113, 3115, 3118, 3119, 3126, 3133, 3134, 3135, 3150, 3439, 3440, 3441, 3442, 3443, 3444, 3445, 3447, 3448, 3449, 3451, 3452, 3454, 3455, 3456, 3459, 3460, 3553, 3569, 3592, 3593, 3716, 5818, 5819, 6429, 6430, 6431, 6885, 7297, 8683, 8740, 8764, 9569, 10929, 54205, 55998, 57506, 112950, 148022, 439996								rs1003199, rs1007369, rs1007530, rs1011170, rs10116271, rs10116540, rs10116615, rs10119678, rs1014573, rs1020322, rs10255691, rs10263896, rs10276962, rs1034325, rs1040817, rs1040818, rs1044429, rs10444338, rs10455175, rs10485365, rs10485371, rs10485404, rs10498972, rs10498974, rs10498977, rs10498978, rs10498982, rs10499563, rs10509572, rs1059174, rs1063320, rs10733650, rs10739585, rs10750152, rs1…
HTLV-I infection	interaction, high	1349	<=1.0E-06	84/268	5.12e-05	207, 208, 331, 598, 701, 915, 916, 958, 1019, 1031, 1111, 1147, 1739, 2932, 3105, 3106, 3107, 3109, 3111, 3112, 3113, 3115, 3118, 3119, 3126, 3133, 3134, 3135, 3551, 3554, 3558, 3559, 3560, 3569, 3683, 3716, 3718, 3932, 4055, 4214, 4215, 4790, 4792, 5155, 5156, 5159, 5295, 5423, 5424, 5567, 5568, 5599, 5601, 5602, 5613, 6416, 6776, 6777, 7015, 7046, 7048, 7094, 7157, 7412, 7514, 7850, 8503, 8850,…								rs10001480, rs10018583, rs10024003, rs10026060, rs10027814, rs10028496, rs10029339, rs10032067, rs10033283, rs10037187, rs10037963, rs10040640, rs10043473, rs10051671, rs10056163, rs10064315, rs10070943, rs10071585, rs10075612, rs10078240, rs10086541, rs10093594, rs10098453, rs10132268, rs10147603, rs1016379, rs10167875, rs1017226, rs10178648, rs1019855, rs10218421, rs1024217, rs10255691, rs10263…
Jak-STAT signaling pathway	interaction, medium	1755	<=1.0E-06	127/155	8.784e-104	207, 208, 595, 598, 867, 868, 894, 896, 1154, 1271, 1439, 1440, 1441, 1489, 2056, 2057, 2688, 2689, 2690, 2885, 3439, 3440, 3441, 3442, 3443, 3444, 3445, 3447, 3448, 3449, 3451, 3452, 3454, 3455, 3456, 3458, 3459, 3460, 3467, 3558, 3559, 3560, 3562, 3565, 3566, 3568, 3569, 3570, 3572, 3574, 3575, 3578, 3586, 3587, 3588, 3592, 3593, 3594, 3595, 3596, 3597, 3598, 3716, 3717, 3718, 3952, 3953, 3976,…								rs1002655, rs1002656, rs1003199, rs10036224, rs10037187, rs10038062, rs10040640, rs10043473, rs10044080, rs10044838, rs10045084, rs1005017, rs10050597, rs10050889, rs10053847, rs10055279, rs10056163, rs10056553, rs10059243, rs10064315, rs10070418, rs10070943, rs10071384, rs10071585, rs10075612, rs10078240, rs10079816, rs10080135, rs1009231, rs10093522, rs10106730, rs10116352, rs10116540, rs101166…
Tumor viruses and cancer	interaction, ultra	303	<=1.0E-06	26/207	0.9997	572, 718, 998, 3105, 3106, 3107, 3133, 3134, 3135, 3249, 3716, 3718, 4055, 5366, 5423, 8344, 8347, 8360, 8364, 8365, 8367, 8379, 8850, 11317, 23533, 286436								rs1002169, rs1002170, rs10226475, rs10234557, rs10242452, rs10244946, rs10255204, rs10275045, rs10276536, rs10278591, rs1034325, rs10503033, rs10503034, rs10515981, rs1059174, rs1063320, rs1077433, rs10889503, rs10889504, rs10917139, rs10917145, rs10917148, rs10917152, rs10946813, rs10950377, rs11064153, rs11208559, rs11231741, rs11569501, rs11569507, rs11569511, rs11569536, rs11569538, rs1157617…
Type I diabetes mellitus	interaction, ultra	267	<=1.0E-06	27/45	4.11e-17	940, 941, 942, 1363, 3105, 3106, 3107, 3109, 3111, 3112, 3113, 3115, 3118, 3119, 3126, 3133, 3134, 3135, 3552, 3553, 3558, 3592, 3593								rs1003199, rs10050033, rs10174652, rs10193976, rs1034325, rs1044429, rs10490573, rs10517845, rs10517846, rs1059174, rs1063320, rs1077433, rs10866712, rs11677416, rs11680809, rs11689629, rs11724900, rs11728234, rs11728337, rs11732583, rs11926233, rs11928737, rs11940401, rs12191230, rs1246924, rs12613538, rs12635350, rs12642989, rs13032082, rs13032680, rs13064589, rs13102614, rs13109800, rs13111857…
Viral myocarditis	interaction, ultra	237	<=1.0E-06	39/72	7.165e-22	637, 857, 940, 941, 942, 958, 959, 1525, 1605, 3105, 3106, 3107, 3109, 3111, 3112, 3113, 3115, 3118, 3119, 3126, 3133, 3134, 3135, 3683, 6442, 54205								rs10174652, rs10193976, rs10227696, rs10276962, rs1034325, rs1044429, rs10490573, rs1049334, rs1050088, rs1059174, rs1063320, rs1077433, rs11689629, rs11911177, rs11971170, rs12012220, rs12100401, rs12191230, rs12451943, rs12556784, rs12613538, rs12700582, rs13032082, rs13032680, rs13064589, rs1354162, rs1569723, rs1610593, rs1610742, rs1611381, rs1611388, rs1611635, rs1611699, rs1611701, rs16117…
Basal cell carcinoma	pathway	1288	0.0002	49/55	3.245e-44	324, 650, 652, 1499, 1857, 2535, 2735, 2736, 2737, 2932, 5727, 6469, 6932, 6934, 7157, 7472, 7473, 7474, 7475, 7476, 7478, 7479, 7480, 7481, 7482, 7483, 7484, 7855, 7976, 8312, 8313, 8321, 8322, 8323, 8324, 8325, 8326, 8643, 11211, 27148, 51176, 51384, 51684, 54361, 64399, 80326, 81029, 83439, 89780								rs10029738, rs1003876, rs10049173, rs10055448, rs10069134, rs1009390, rs1009609, rs1012579, rs10128675, rs10129157, rs10132541, rs10136885, rs10137772, rs10144925, rs10147611, rs10151226, rs10165984, rs10174520, rs10193725, rs10205484, rs10229523, rs10234444, rs10237371, rs10241082, rs10241688, rs10241947, rs10242164, rs10242792, rs10243298, rs10244735, rs10244786, rs10248949, rs10249530, rs10250…
Cytokine-cytokine receptor interaction	pathway	3900	0.0002	216/265	7.881e-177	90, 91, 92, 93, 355, 356, 608, 643, 650, 655, 657, 658, 659, 943, 944, 958, 959, 970, 1230, 1232, 1233, 1234, 1235, 1236, 1237, 1271, 1435, 1436, 1437, 1439, 1440, 1441, 1489, 1524, 1896, 1950, 1956, 2056, 2057, 2277, 2321, 2322, 2324, 2688, 2689, 2690, 2829, 2919, 2920, 3082, 3439, 3440, 3441, 3442, 3443, 3444, 3445, 3447, 3448, 3449, 3451, 3452, 3454, 3455, 3456, 3458, 3459, 3460, 3467, 3552, 3…								rs10000203, rs10000241, rs10005096, rs1000515, rs10005450, rs10006293, rs10006360, rs10006747, rs10008126, rs10012879, rs10016230, rs10017471, rs10017970, rs10018731, rs10018945, rs1002084, rs10022682, rs10023994, rs1002655, rs1002656, rs10027656, rs10027875, rs10029166, rs10029654, rs10029718, rs1003199, rs10033375, rs10036224, rs10038062, rs10038760, rs10044080, rs10044838, rs10045084, rs100496…
Staphylococcus aureus infection	interaction, ultra	142	0.0002	24/56	3.405e-11	717, 718, 727, 728, 2204, 2212, 3109, 3111, 3112, 3113, 3115, 3118, 3119, 3126, 3586, 3683, 3684, 4153, 6403, 6404								rs10116271, rs1044429, rs10494355, rs10733650, rs10739585, rs10760135, rs10800462, rs10824381, rs10824779, rs10824784, rs10853782, rs10919203, rs10985112, rs10985126, rs10985127, rs11002340, rs11003040, rs11003084, rs11003114, rs11114011, rs11119447, rs11150610, rs11569501, rs11569507, rs11569511, rs11569536, rs11569538, rs11598427, rs11672983, rs11673207, rs1179766, rs1194659, rs1194662, rs11946…
Hedgehog signaling pathway	interaction, medium	1371	0.0004	48/56	1.442e-41	650, 652, 653, 654, 655, 656, 1452, 1454, 1455, 1456, 2619, 2735, 2736, 2737, 2932, 5567, 5568, 5613, 5727, 7472, 7473, 7474, 7475, 7476, 7478, 7479, 7480, 7481, 7482, 7483, 7484, 7546, 8643, 8945, 23291, 27148, 51384, 51684, 51715, 53944, 54361, 64399, 80326, 81029, 89780, 122011, 353500								rs10029738, rs10038345, rs1003876, rs10040841, rs10043440, rs1004434, rs10049173, rs10055109, rs10055291, rs10061285, rs10063876, rs10064428, rs10067312, rs10068589, rs10069013, rs10070979, rs10085115, rs10120212, rs10124274, rs10129157, rs10132541, rs10136885, rs10137772, rs10144925, rs10147611, rs10151226, rs1015985, rs1016379, rs10193725, rs10218421, rs10229523, rs1023114, rs10234444, rs102373…
Natural killer cell mediated cytotoxicity	interaction, ultra	384	0.0004	105/137	3.757e-80	637, 673, 919, 962, 2207, 3105, 3106, 3107, 3133, 3135, 3439, 3440, 3441, 3442, 3443, 3444, 3445, 3447, 3448, 3449, 3451, 3452, 3454, 3455, 3456, 3459, 3460, 3683, 3805, 3806, 3809, 3821, 3824, 4277, 8743, 8793, 8794, 9436, 22914, 23533, 27040, 51744, 79465, 80328, 80329, 135250, 154064, 353091, 100507436, 100528032								rs10102276, rs10111172, rs10116540, rs10116615, rs10119678, rs10244133, rs10281173, rs1034325, rs10457852, rs10487888, rs1063320, rs10734826, rs10734827, rs10752639, rs10757178, rs10757181, rs10757219, rs10772285, rs1077433, rs10811497, rs10811519, rs10811523, rs10811525, rs10811527, rs10845089, rs10908805, rs10918702, rs10964856, rs10964878, rs10964882, rs10964930, rs10964981, rs10964985, rs1105…
Butanoate metabolism	interaction, ultra	7	0.0006	2/30	0.7853	79944								rs12432105, rs4901000, rs4901008, rs737077, rs8013174, rs8013289, rs910641
Chemokine signaling pathway	interaction, high	2361	0.0006	141/189	8.07e-105	157, 207, 208, 643, 673, 998, 1147, 1230, 1232, 1233, 1234, 1235, 1236, 1237, 1398, 1399, 1524, 2268, 2786, 2787, 2788, 2791, 2793, 2829, 2868, 2869, 2870, 2885, 2919, 2920, 2932, 3055, 3551, 3576, 3577, 3579, 3702, 3717, 3718, 4067, 4283, 4790, 4792, 4793, 5058, 5196, 5197, 5295, 5330, 5331, 5332, 5473, 5567, 5568, 5594, 5604, 5613, 6093, 6346, 6347, 6348, 6351, 6352, 6354, 6355, 6356, 6357, 635…								rs10000203, rs10000241, rs10006360, rs1000927, rs10012879, rs10016230, rs1002084, rs10037187, rs10038760, rs10040640, rs10043473, rs10054204, rs10056163, rs10064315, rs10070943, rs10071585, rs10075612, rs1007662, rs10078240, rs10079961, rs1008454, rs1008673, rs10089762, rs10100561, rs10116352, rs10119004, rs10119727, rs10131301, rs10132268, rs10138800, rs1014157, rs1014638, rs10147603, rs10147986…
Tuberculosis	interaction, ultra	429	0.0006	116/182	8.196e-74	537, 572, 637, 718, 805, 820, 972, 1509, 2207, 2212, 3109, 3111, 3112, 3113, 3115, 3118, 3119, 3126, 3439, 3440, 3441, 3442, 3443, 3444, 3445, 3447, 3448, 3449, 3451, 3452, 3456, 3459, 3460, 3552, 3553, 3569, 3586, 3587, 3588, 3592, 3593, 3606, 3684, 3687, 3716, 3920, 3929, 4046, 5994, 8844, 8877, 10332, 22925, 26253, 30835, 51561, 54205, 64581								rs1003199, rs10116540, rs10116615, rs10119678, rs10153674, rs10172635, rs10196882, rs10255691, rs10263896, rs10276962, rs1044429, rs10494355, rs10499563, rs1058867, rs10757178, rs10757181, rs10757219, rs10770850, rs10811497, rs10811519, rs10811523, rs10811525, rs10811527, rs10841879, rs10853147, rs10854364, rs10866712, rs10889503, rs10889504, rs10929965, rs10950917, rs10950919, rs10964856, rs1096…
Rheumatoid arthritis	interaction, ultra	326	0.0008	48/92	1.225e-25	537, 940, 941, 942, 1435, 1493, 2321, 3109, 3111, 3112, 3113, 3115, 3118, 3119, 3126, 3552, 3553, 3569, 3605, 3606, 3683, 4312, 4314, 5228, 7422, 8600, 8792, 10673, 51561								rs10174652, rs10179639, rs10193976, rs1022926, rs10255691, rs10263896, rs1034375, rs1044429, rs10484879, rs10484881, rs10490573, rs10499563, rs10507507, rs10507513, rs10507514, rs10507516, rs10950917, rs10950919, rs11069734, rs11102019, rs11171806, rs11225429, rs11225434, rs1122913, rs11571292, rs11571293, rs11571304, rs11577194, rs11618877, rs11677416, rs11680809, rs11689629, rs12089727, rs12165…
Phagosome	interaction, ultra	570	0.0010002	60/156	6.72e-23	537, 718, 948, 949, 1535, 1783, 2204, 2212, 3105, 3106, 3107, 3109, 3111, 3112, 3113, 3115, 3118, 3119, 3126, 3133, 3134, 3135, 3673, 3684, 3920, 4074, 4153, 4973, 6441, 7037, 7278, 10332, 10952, 22925, 23480, 29927, 30835, 51143, 53407, 55176, 64581, 78989, 81035								rs1000579, rs10009773, rs10017573, rs1006487, rs1009438, rs10115446, rs10121003, rs10196882, rs10210631, rs10212131, rs10215617, rs10238349, rs10244229, rs1030656, rs1034325, rs1044429, rs10492522, rs10494355, rs10516164, rs10516165, rs1053403, rs1059174, rs1063320, rs10760689, rs10773111, rs1077433, rs1078066, rs10788338, rs10819684, rs10824381, rs10824779, rs10824784, rs10845053, rs10846691, rs…
T cell receptor signaling pathway	pathway	2244	0.0010002	93/108	3.907e-80	207, 208, 867, 868, 915, 916, 919, 920, 925, 926, 940, 959, 998, 1019, 1147, 1326, 1432, 1437, 1493, 1739, 2353, 2534, 2885, 2932, 3458, 3551, 3558, 3565, 3567, 3586, 3702, 3725, 3845, 3932, 3937, 4690, 4772, 4773, 4775, 4776, 4790, 4792, 4793, 4893, 5058, 5062, 5063, 5163, 5290, 5291, 5293, 5294, 5295, 5335, 5530, 5532, 5533, 5534, 5588, 5594, 5601, 5603, 5604, 5788, 5894, 5970, 6654, 6655, 6885…								rs10005711, rs10011961, rs10030362, rs10031159, rs10037187, rs10040640, rs10043473, rs1004725, rs10050695, rs10056163, rs1005834, rs1006355, rs10064315, rs10068619, rs10070943, rs1007126, rs10071585, rs10075612, rs10078240, rs10079961, rs1011170, rs1011185, rs10119727, rs10129564, rs10132268, rs10132979, rs10133192, rs10135572, rs10145260, rs1014573, rs10147603, rs10159308, rs10172481, rs10174652…
Asthma	pathway	102	0.00140028	23/31	6.841e-18	958, 959, 2205, 2206, 2207, 3109, 3111, 3112, 3113, 3115, 3118, 3119, 3126, 3562, 3565, 3567, 3578, 3586, 3596, 5553, 6037, 6356, 8288								rs1044429, rs10489849, rs10853004, rs10896615, rs11119447, rs11230161, rs12012220, rs12119226, rs12135788, rs12191230, rs12556784, rs12656759, rs1303621, rs1554286, rs1569723, rs16969449, rs16969457, rs17132324, rs17169344, rs17169348, rs17254457, rs17330906, rs175737, rs176248, rs17666424, rs181781, rs1883834, rs1883835, rs20541, rs2069757, rs2181135, rs2227282, rs2227284, rs2243218, rs2243248, …
Systemic lupus erythematosus	interaction, ultra	203	0.0020004	57/138	1.213e-23	717, 718, 727, 940, 941, 942, 958, 959, 2212, 3109, 3111, 3112, 3113, 3115, 3118, 3119, 3126, 3586, 6738, 8335, 8344, 8347, 8353, 8355, 8358, 8360, 8364, 8365, 8367, 8968, 286436, 440093								rs10116271, rs10174652, rs10193976, rs1044429, rs10484434, rs10484435, rs10490573, rs10494355, rs10506080, rs10733650, rs10739585, rs10743769, rs10760135, rs10801173, rs10844025, rs10844055, rs10946813, rs10985112, rs10985126, rs10985127, rs11051588, rs11051643, rs11051695, rs11119447, rs1150966, rs1150990, rs11569501, rs11569507, rs11569511, rs11569536, rs11569538, rs11611197, rs11689629, rs1175…
Osteoclast differentiation	interaction, high	1501	0.00220044	89/128	8.736e-62	207, 208, 695, 814, 1147, 1432, 1435, 1436, 1535, 2212, 2534, 2885, 3454, 3455, 3456, 3459, 3460, 3551, 3552, 3553, 3554, 3716, 3932, 3937, 4689, 4790, 4792, 4982, 5295, 5336, 5594, 5599, 5601, 5602, 5603, 5604, 5608, 6772, 6850, 6885, 7006, 7046, 7048, 7297, 8503, 8600, 8651, 8792, 9020, 9021, 9846, 10000, 10326, 10990, 11006, 11024, 11026, 11027, 23533, 23547, 29760, 55423, 79168, 140885								rs10001480, rs10024003, rs10026060, rs10029339, rs10033283, rs10037187, rs10040249, rs10040640, rs10043473, rs10050695, rs10056163, rs10064315, rs10068619, rs10070943, rs10071585, rs10075612, rs10078240, rs1007837, rs1010101, rs1011170, rs10112537, rs10114465, rs10114624, rs10132268, rs1013996, rs1014573, rs10147603, rs1019855, rs10199181, rs1020322, rs1022649, rs1022926, rs1028593, rs1036097, rs…
RNA transport	characteristic	776	0.0030006	68/153	2.78e-30	1207, 1967, 1968, 1974, 1983, 2332, 5903, 5905, 6612, 6613, 7341, 8087, 8487, 8563, 8661, 8662, 8664, 8665, 8666, 8891, 8892, 8893, 8894, 9631, 9669, 9688, 9818, 9972, 10073, 10289, 10419, 10460, 10605, 10762, 11097, 11102, 11171, 11218, 11260, 23165, 23225, 23279, 23511, 25929, 50628, 51095, 51808, 53371, 54960, 55520, 55706, 55746, 57122, 57510, 60528, 79023, 79760, 79833, 79897, 80145, 81929, …								rs1005451, rs10059993, rs10063061, rs1010303, rs1011927, rs1012545, rs10145743, rs10153318, rs1015361, rs10166594, rs10168517, rs10173357, rs10174893, rs10176091, rs10176508, rs10176567, rs10176594, rs10183564, rs10188396, rs10190171, rs10190898, rs1019265, rs1019283, rs10197130, rs10202074, rs10203961, rs10204803, rs10207503, rs10209275, rs10209643, rs10221121, rs10224307, rs10232205, rs1023576,…
Toxoplasmosis	interaction, ultra	533	0.0030006	100/133	6.625e-75	572, 958, 959, 3109, 3111, 3112, 3113, 3115, 3118, 3119, 3126, 3459, 3460, 3586, 3587, 3588, 3592, 3593, 3716, 5319, 5320, 5322, 6885, 7297, 8681, 23533, 26279, 30814, 54205, 64600, 81579, 84647, 345611, 391013								rs1003199, rs1011170, rs1014573, rs1020322, rs10276962, rs1040817, rs1040818, rs1044429, rs10455175, rs10485365, rs10485371, rs10485404, rs10498972, rs10498974, rs10498977, rs10498978, rs10498982, rs1058867, rs10753482, rs10799612, rs10806443, rs10806445, rs10854364, rs10866712, rs10889503, rs10889504, rs10916679, rs10916685, rs10916711, rs10944485, rs10944560, rs10944606, rs10944640, rs11000486,…
Galactose metabolism	pathway	552	0.00340068	23/27	2.243e-20	231, 2538, 2548, 2585, 2595, 2645, 2683, 2717, 2720, 3098, 3099, 3101, 3906, 3938, 5211, 5213, 5214, 5236, 6476, 7360, 8972, 55276, 57016, 57818, 80201								rs10028206, rs10047370, rs10113903, rs1015204, rs10232478, rs1023431, rs10263438, rs1027793, rs1032206, rs1038810, rs1041598, rs1042712, rs10466265, rs10493350, rs1049392, rs10496195, rs10517423, rs10518763, rs1053000, rs1065765, rs10751831, rs10751864, rs10751876, rs10751884, rs10751898, rs10758189, rs10758198, rs10762277, rs10783269, rs10783270, rs10789146, rs10794818, rs10794864, rs10794865, r…
Intestinal immune network for IgA production	interaction, ultra	278	0.00360072	34/49	2.831e-24	608, 940, 941, 942, 958, 959, 3109, 3111, 3112, 3113, 3115, 3118, 3119, 3126, 3558, 3565, 3569, 3586, 4055, 5284, 10673, 23308, 23495, 29851, 57379								rs10172481, rs10174652, rs10180136, rs10180781, rs10193976, rs10255691, rs10263896, rs1044429, rs10490573, rs10499563, rs10770847, rs10770856, rs10841875, rs10932036, rs10932038, rs10932047, rs10932049, rs10932053, rs10932058, rs10950917, rs10950919, rs11064153, rs11069734, rs11119447, rs1122913, rs11571300, rs11618877, rs11656859, rs11689629, rs11690070, rs11884257, rs12012220, rs12105515, rs121…
Endocytosis	interaction, ultra	593	0.005001	77/204	2.208e-28	857, 858, 859, 998, 1436, 2060, 2263, 2264, 2321, 2348, 2352, 3105, 3106, 3107, 3133, 3134, 3135, 3560, 3791, 3815, 4914, 5156, 7037, 7251, 9135, 9727, 51028, 51534, 51652, 84440, 89853, 390243								rs10050046, rs10081624, rs1010101, rs10227696, rs10228039, rs10239692, rs1034325, rs1036940, rs10434440, rs10488849, rs10490800, rs10491513, rs1049334, rs10500062, rs10510083, rs10510085, rs10510086, rs1059174, rs1063320, rs1065483, rs10749418, rs10760419, rs10760430, rs1077433, rs1078806, rs10788134, rs10788178, rs10788183, rs10819136, rs10819146, rs10866417, rs10886868, rs10886885, rs1089425, r…
Vasopressin-regulated water reabsorption	characteristic interaction, ultra	15	0.00540108	19/44	3.189e-09	10671, 51626, 84516								rs10106278, rs10503863, rs10954971, rs11996929, rs12541729, rs16876889, rs2938234, rs2958750, rs2958757, rs3792008, rs3792009, rs3792020, rs4148196, rs6994064, rs8043812
Leishmaniasis	interaction, ultra	463	0.00560112	52/73	2.189e-37	718, 1535, 2212, 3109, 3111, 3112, 3113, 3115, 3118, 3119, 3126, 3459, 3460, 3552, 3553, 3565, 3586, 3592, 3593, 3684, 3716, 6885								rs1003199, rs1011170, rs1014573, rs1020322, rs1040817, rs1040818, rs1044429, rs10455175, rs10485365, rs10485371, rs10485404, rs10494355, rs10498972, rs10498974, rs10498977, rs10498978, rs10498982, rs10806443, rs10806445, rs10866712, rs10889503, rs10889504, rs10944485, rs10944560, rs10944606, rs10944640, rs11119447, rs11150610, rs11208559, rs1124386, rs1126353, rs1126354, rs1143794, rs1144159, rs1…
Pertussis	pathway	668	0.00560112	61/75	3.526e-28	710, 712, 713, 716, 717, 718, 722, 725, 727, 801, 805, 808, 810, 834, 836, 840, 929, 1072, 1073, 1432, 2353, 2770, 2771, 2773, 3394, 3552, 3553, 3569, 3576, 3586, 3592, 3593, 3654, 3659, 3678, 3684, 3688, 3689, 3725, 4615, 4790, 4843, 5594, 5599, 5601, 5602, 5603, 5970, 6372, 6374, 7099, 7189, 10392, 23643, 51135, 51561, 51806, 114548, 114609, 148022, 353376								rs10001480, rs10024003, rs10026060, rs10029339, rs1003199, rs10033283, rs10116271, rs10129564, rs10132599, rs10132979, rs10133192, rs10135572, rs10139660, rs10151959, rs10153674, rs10159308, rs10172635, rs10229737, rs10241877, rs10244538, rs10255691, rs10263896, rs10268519, rs10274707, rs10277713, rs1032596, rs10399826, rs1046864, rs10480799, rs10494890, rs10499563, rs10499847, rs10509984, rs1051…
Measles	interaction, high	1403	0.0060012	101/134	7.776e-76	207, 208, 355, 868, 915, 916, 940, 1017, 1019, 1021, 1147, 1457, 1459, 1796, 2534, 2932, 3439, 3440, 3441, 3442, 3443, 3444, 3445, 3447, 3448, 3449, 3451, 3452, 3454, 3455, 3456, 3459, 3460, 3552, 3553, 3558, 3559, 3560, 3565, 3569, 3592, 3593, 3596, 3654, 3716, 3717, 3718, 4068, 4615, 4790, 4792, 4793, 5295, 5610, 6504, 6772, 6774, 6776, 6777, 6869, 6885, 7097, 7099, 7128, 7157, 7161, 7297, 8503…								rs1003199, rs10037187, rs1003827, rs10040640, rs10043473, rs10056163, rs10064315, rs10070943, rs10071585, rs10075612, rs10078240, rs10102276, rs10111172, rs1011170, rs10116352, rs10116540, rs10116615, rs10119004, rs10119678, rs10132268, rs1014573, rs10147603, rs10168354, rs10174652, rs10193976, rs10194748, rs10199181, rs1020322, rs10203484, rs10208470, rs1022649, rs10230949, rs10234981, rs1025569…
Influenza A	characteristic	134	0.00920184	110/176	1.129e-68	3267, 3836, 5045, 10625, 11100, 56649, 84000, 91543								rs10127540, rs10160375, rs10185822, rs10189795, rs10421990, rs10736490, rs10736491, rs10750123, rs10750124, rs10752951, rs10790230, rs10798024, rs10892188, rs10892208, rs10892209, rs10911702, rs10911722, rs10911723, rs10911725, rs10911726, rs10911755, rs10929456, rs10933188, rs10934602, rs11216607, rs11216647, rs11216666, rs11216674, rs11216700, rs11216702, rs11216703, rs11216705, rs11216706, rs1…
Drug metabolism	characteristic interaction, ultra	3	0.00960192	1/51	1	7172								rs11964408, rs2842950, rs2859778
Cocaine addiction	pathway	1542	0.0114023	39/50	2.575e-17	111, 468, 627, 1020, 1385, 1386, 1644, 1742, 1812, 1813, 2354, 2770, 2771, 2773, 2778, 2891, 2903, 2904, 2905, 2906, 2913, 3725, 4128, 4129, 4790, 5173, 5567, 5568, 5613, 5970, 6531, 6570, 6571, 8787, 9586, 64764, 84699, 90993, 116443								rs10000610, rs10004211, rs10011455, rs10031554, rs1003407, rs10052016, rs10053602, rs1005549, rs10057481, rs10057497, rs10069450, rs10070886, rs1010271, rs10107837, rs10115450, rs10116192, rs10120848, rs10123826, rs1012586, rs1013264, rs1013548, rs10159308, rs1016181, rs1016379, rs10172070, rs1017685, rs10180144, rs1018077, rs1018078, rs10218421, rs10219275, rs10224250, rs10225559, rs10225574, rs…
Sphingolipid metabolism	pathway	915	0.0130026	34/40	1.642e-29	410, 427, 2531, 2581, 2629, 2717, 2720, 4759, 6609, 7357, 7368, 8560, 8611, 8612, 8613, 8877, 8879, 9331, 9514, 9517, 10558, 10825, 29956, 55304, 55331, 55512, 56624, 64781, 79603, 91012, 123099, 125981, 130367, 166929, 204219, 253782, 259230, 339221, 340485								rs10008418, rs10019345, rs10021742, rs1002666, rs10108779, rs10112857, rs10118371, rs10119829, rs10120186, rs10123805, rs10132895, rs10135955, rs10139003, rs10140584, rs10143139, rs10147424, rs10166668, rs10174987, rs10179586, rs10186450, rs10189316, rs10197969, rs1020572, rs10213347, rs1022560, rs1022561, rs1023431, rs1029340, rs1030561, rs1039296, rs10485759, rs10489776, rs10490964, rs10493186,…
MAPK signaling pathway	characteristic	756	0.0132026	149/268	8.203e-83	1844, 1845, 1846, 1847, 1849, 1852, 3925, 4296, 4763, 5494, 5495, 5536, 5801, 5924, 6788, 8491, 8550, 9175, 9344, 9448, 9693, 11072, 11221, 23162, 23542, 51295, 51347, 56940, 57551, 80824, 84867, 115727								rs10004343, rs10008908, rs10011041, rs10011799, rs10016149, rs10017696, rs10021604, rs10022176, rs10025071, rs10025560, rs10027110, rs10031882, rs10050099, rs10099079, rs10099976, rs10099978, rs10105045, rs10110413, rs1012226, rs10142834, rs10171484, rs1017574, rs10180864, rs1018218, rs10194088, rs1020720, rs1020721, rs10208929, rs1024782, rs1026514, rs1031675, rs1033732, rs1034017, rs1034018, rs…
Shigellosis	pathway	956	0.0156031	52/62	6.192e-44	25, 60, 71, 391, 960, 998, 1147, 1398, 1399, 1432, 1729, 1793, 2017, 3059, 3551, 3576, 3678, 3688, 4790, 4792, 4793, 5217, 5594, 5599, 5601, 5602, 5603, 5879, 5970, 6093, 6714, 7307, 7322, 7414, 7454, 8767, 8936, 8945, 8976, 9474, 9475, 9844, 10092, 10094, 10109, 10163, 10392, 10459, 10552, 23291, 64127, 81873, 375189								rs10001480, rs10024003, rs10026060, rs10029339, rs10033283, rs10040841, rs10061285, rs1006217, rs10064428, rs10067312, rs10068589, rs10069013, rs10087008, rs10103760, rs10106118, rs1012116, rs10132268, rs10147603, rs1016321, rs10167277, rs1017148, rs10171839, rs1018552, rs10198045, rs10205944, rs10218871, rs10224438, rs10238916, rs10239693, rs10255208, rs1025641, rs10256450, rs10257460, rs1026231…
NOD-like receptor signaling pathway	pathway	875	0.0170034	46/59	3.065e-36	330, 834, 838, 841, 1147, 1432, 2919, 2920, 3320, 3326, 3551, 3553, 3569, 3576, 3606, 4210, 4790, 4792, 4793, 5594, 5599, 5601, 5602, 5603, 5970, 6347, 6352, 6885, 7128, 7184, 7189, 8767, 9051, 10392, 10454, 22861, 22900, 23118, 55914, 58484, 59082, 64127, 84674, 114548, 257397								rs10001480, rs1001676, rs10024003, rs10026060, rs10029339, rs10033283, rs10055584, rs10057505, rs10087008, rs10103760, rs10106118, rs1011170, rs1012116, rs10132268, rs1013276, rs1013277, rs1014573, rs10147603, rs1018281, rs1020322, rs1022197, rs1022198, rs10255691, rs10263896, rs1028593, rs10399826, rs10406657, rs10407902, rs1040817, rs1040818, rs10410339, rs10420505, rs10421339, rs10429371, rs10…
B cell receptor signaling pathway	interaction, high	767	0.0190038	59/75	1.411e-46	207, 208, 695, 933, 971, 974, 1147, 1380, 2885, 2932, 3551, 3635, 4067, 4790, 4792, 4793, 5295, 5336, 5594, 5604, 6850, 7409, 7410, 8503, 8915, 10000, 10451, 23533, 27071, 29760, 84433, 118788								rs10031708, rs10037187, rs10040640, rs10043473, rs10056163, rs10064315, rs10070943, rs10071585, rs10075612, rs10078240, rs10089762, rs10100561, rs10114465, rs10114624, rs10119727, rs10132268, rs10147603, rs10210302, rs10218891, rs10229652, rs10240660, rs10241890, rs10252183, rs10267119, rs1027986, rs10280353, rs1028593, rs10443202, rs10487884, rs10491067, rs10493763, rs10494080, rs10494081, rs104…
Bacterial invasion of epithelial cells	interaction, ultra	234	0.0204041	52/71	2.117e-38	857, 858, 859, 998, 9844, 10092, 10109, 23533, 81873								rs1016321, rs1017148, rs10171839, rs10224438, rs10227696, rs10228039, rs10238916, rs10239692, rs10239693, rs10255208, rs10256450, rs10257460, rs10267165, rs10268319, rs10274668, rs10277512, rs10279544, rs10282309, rs1035582, rs1035690, rs10488021, rs10488031, rs10490800, rs1049334, rs10500062, rs1051358, rs1078496, rs10917139, rs10917145, rs10917148, rs10917152, rs10951500, rs10953817, rs10986471…
Melanogenesis	pathway	2534	0.0208042	90/101	1.467e-80	107, 108, 109, 111, 112, 113, 114, 115, 434, 801, 805, 808, 810, 815, 816, 817, 818, 1385, 1387, 1499, 1638, 1857, 1906, 1910, 2033, 2535, 2770, 2771, 2773, 2775, 2776, 2778, 2932, 3815, 3845, 4157, 4254, 4286, 4893, 5330, 5331, 5332, 5443, 5567, 5568, 5578, 5579, 5582, 5594, 5604, 5613, 5894, 6932, 6934, 7299, 7306, 7472, 7473, 7474, 7475, 7476, 7478, 7479, 7480, 7481, 7482, 7483, 7484, 7855, 79…								rs10000775, rs10005635, rs10009286, rs10012684, rs1001497, rs10015062, rs10015110, rs10023113, rs10031040, rs10035541, rs10036787, rs10049173, rs10050608, rs10053728, rs10055448, rs10063966, rs10066581, rs10068942, rs10087741, rs10093375, rs10095393, rs10095524, rs1009609, rs10097218, rs10104127, rs1010544, rs10108431, rs1011185, rs10112018, rs10114316, rs10118338, rs10118714, rs1012579, rs101286…
Ribosome	characteristic interaction, ultra	1	0.0216043	1/92	0.9999	6171								rs1689512
TGF-beta signaling pathway	pathway	2019	0.025205	73/85	7.476e-63	90, 92, 93, 650, 652, 653, 654, 655, 656, 657, 658, 659, 1387, 1634, 1874, 1875, 2033, 3397, 3398, 3399, 3400, 3458, 3624, 3625, 3626, 4052, 4086, 4087, 4088, 4089, 4090, 4091, 4092, 4093, 4609, 4838, 5308, 5515, 5518, 5519, 5594, 5933, 5934, 6093, 6198, 6199, 6500, 6667, 7027, 7042, 7043, 7044, 7046, 7048, 7057, 7058, 7060, 8200, 8454, 8646, 9241, 9372, 9475, 9765, 9978, 10468, 10637, 57154, 647…								rs10000873, rs10003405, rs10005096, rs10005450, rs10008126, rs10015214, rs10018945, rs10027656, rs1003492, rs1004765, rs10049681, rs10050107, rs10056474, rs10064147, rs1007007, rs1007239, rs1007518, rs10083047, rs10083048, rs10096521, rs10104165, rs10106754, rs1012249, rs10129157, rs10132541, rs10136885, rs10137772, rs1014064, rs10144925, rs10147611, rs10151226, rs10155491, rs1015985, rs10162965,…
ABC transporters	pathway	716	0.0256051	41/44	4.106e-39	19, 20, 21, 24, 215, 225, 368, 1080, 1244, 4363, 5243, 5244, 5825, 5826, 6833, 6890, 6891, 8647, 8714, 9429, 9619, 10057, 10060, 10257, 10349, 10350, 10351, 11194, 23456, 23457, 23460, 23461, 26154, 64137, 64240, 64241, 85320, 89845, 94160, 154664, 340273								rs1000002, rs1004301, rs1004302, rs1012371, rs1014235, rs10177417, rs10186294, rs10187636, rs10198064, rs10200158, rs10226404, rs10227179, rs10234192, rs10234238, rs10236551, rs10240195, rs10243683, rs1024598, rs10248242, rs10255612, rs10256255, rs10260049, rs10261964, rs10264990, rs10266329, rs10267753, rs10273407, rs10276036, rs10276319, rs10276916, rs10280101, rs10280418, rs10280481, rs1031219…
Homologous recombination	characteristic	149	0.0264053	11/28	1.907e-05	4683, 5890, 5892, 5893, 7516, 8438, 25788								rs10109454, rs10130919, rs10132294, rs10133262, rs10138140, rs10143455, rs10146321, rs10146772, rs10248434, rs10248766, rs10483810, rs10849605, rs10952367, rs10956914, rs11158719, rs11158730, rs11158757, rs11158758, rs11158762, rs11571435, rs11571468, rs11623355, rs11624164, rs11624166, rs11624333, rs11627646, rs11628653, rs11846344, rs11850191, rs12431919, rs1274643, rs12889206, rs12889666, rs12…
Toll-like receptor signaling pathway	characteristic interaction, high	1	0.0276055	79/102	4.375e-61	51311								rs5979785
Huntington's disease	pathway	2069	0.0280056	121/183	8.129e-80	160, 161, 163, 291, 292, 293, 317, 498, 509, 517, 518, 539, 627, 836, 841, 842, 1175, 1211, 1213, 1327, 1337, 1345, 1350, 1351, 1385, 1387, 1639, 1742, 2033, 2776, 2904, 2911, 2915, 3064, 3066, 3092, 3708, 4694, 4696, 4697, 4698, 4700, 4702, 4704, 4705, 4706, 4710, 4712, 4716, 4718, 4719, 4720, 4723, 4724, 4725, 4726, 4728, 4729, 4731, 4899, 5330, 5331, 5332, 5430, 5431, 5432, 5433, 5434, 5468, 5…								rs1000061, rs10005129, rs10007750, rs10010833, rs10015979, rs10020457, rs10021254, rs10023088, rs10026915, rs10032829, rs10040756, rs10040791, rs10051603, rs1005549, rs10059571, rs10065919, rs1007573, rs10092898, rs1009295, rs10125115, rs1012586, rs10128881, rs10131139, rs1013548, rs10138608, rs10140498, rs10150596, rs10150617, rs10164229, rs10172070, rs10178101, rs10180144, rs10181407, rs1018945…
Butirosin and neomycin biosynthesis	pathway	67	0.0294059	5/5	7.135e-06	2645, 3098, 3099, 3101, 80201								rs1027793, rs1032206, rs10496195, rs10762277, rs10823333, rs10823349, rs10823356, rs10865404, rs10998679, rs10998744, rs11126440, rs11686654, rs12989728, rs1303722, rs13384240, rs1472814, rs1545522, rs1565064, rs1565068, rs17010530, rs17832252, rs1867971, rs2021753, rs2041835, rs205618, rs205619, rs205637, rs205638, rs205645, rs2171385, rs2300586, rs28362967, rs363617, rs363624, rs363625, rs37323…
Cell adhesion molecules (CAMs)	pathway	5225	0.0338068	111/136	2.534e-90	214, 914, 920, 923, 925, 926, 933, 940, 941, 942, 947, 958, 959, 965, 999, 1000, 1001, 1002, 1003, 1013, 1272, 1364, 1365, 1462, 1493, 2734, 3105, 3106, 3107, 3109, 3111, 3112, 3113, 3115, 3118, 3119, 3126, 3133, 3134, 3135, 3385, 3655, 3676, 3680, 3683, 3684, 3685, 3688, 3689, 3695, 3696, 4099, 4267, 4359, 4684, 4685, 4756, 4897, 5010, 5175, 5788, 5792, 5797, 5818, 5819, 6382, 6383, 6385, 6401, …								rs1000625, rs1001162, rs1002715, rs10045126, rs10047413, rs10049325, rs1005388, rs1005834, rs10059489, rs1006644, rs1006826, rs1006832, rs1006833, rs1007304, rs1007369, rs1007530, rs10081247, rs10081857, rs10082977, rs1008434, rs10084595, rs10085952, rs10086882, rs1009737, rs1009897, rs10099072, rs10100191, rs10110591, rs1011275, rs10114060, rs10118693, rs10121158, rs10122089, rs10122509, rs10127…
Adipocytokine signaling pathway	pathway	1255	0.0340068	59/69	9.914e-51	32, 207, 208, 948, 1147, 1374, 1375, 2180, 2181, 2182, 2475, 2538, 3551, 3667, 3717, 3952, 3953, 4790, 4792, 4793, 4852, 5105, 5106, 5443, 5465, 5562, 5563, 5564, 5565, 5588, 5599, 5601, 5602, 5781, 5970, 6256, 6257, 6258, 6513, 6517, 6774, 7133, 7186, 8471, 8660, 9021, 9370, 10000, 10645, 10891, 23205, 23305, 51422, 51703, 57818, 79602, 81616, 84254, 126129								rs10001480, rs10007750, rs10010833, rs10020457, rs10021219, rs10024003, rs10026060, rs10029339, rs10032829, rs10032937, rs10033283, rs10033885, rs1003634, rs1005592, rs10062565, rs10074987, rs10074991, rs1010447, rs10116352, rs10118518, rs10119004, rs1012731, rs10128072, rs10132268, rs1014677, rs10147603, rs1015249, rs10158279, rs10158937, rs1016331, rs10179260, rs10187044, rs10189760, rs10195273…
Pathways in cancer	pathway	8135	0.0340068	288/327	1.856e-258	25, 207, 208, 324, 330, 331, 332, 354, 355, 356, 367, 369, 405, 572, 595, 596, 598, 613, 637, 650, 652, 673, 675, 836, 841, 842, 861, 862, 867, 868, 898, 998, 999, 1017, 1019, 1021, 1026, 1027, 1029, 1050, 1147, 1282, 1284, 1286, 1288, 1387, 1398, 1399, 1436, 1441, 1487, 1488, 1495, 1496, 1499, 1612, 1630, 1857, 1869, 1870, 1871, 1950, 1956, 2033, 2034, 2064, 2113, 2122, 2246, 2247, 2248, 2249, 2…								rs10001480, rs10006293, rs10006747, rs1001497, rs10016658, rs10024003, rs10025495, rs10026060, rs1002655, rs1002656, rs10029166, rs10029339, rs10029654, rs10029738, rs10033283, rs10037187, rs10038162, rs1003827, rs1003876, rs10040640, rs10043473, rs10043478, rs10045029, rs1004720, rs1004765, rs10049173, rs10049776, rs10055448, rs10056163, rs10062952, rs10064315, rs10064637, rs10065728, rs1006607,…
NF-kappa B signaling pathway	interaction, high	1149	0.0354071	52/92	2.415e-13	330, 331, 596, 598, 695, 929, 958, 959, 1147, 1457, 1459, 2920, 3551, 3553, 3554, 3576, 3654, 3929, 3932, 4055, 4067, 4615, 4790, 4792, 5335, 5336, 6351, 6357, 6363, 6387, 6850, 6885, 7099, 7128, 7185, 7412, 7535, 8600, 8737, 8740, 8792, 8915, 9020, 10673, 23085, 27040, 29760, 51135, 84433, 114609, 148022, 353376								rs10089762, rs10100561, rs1011170, rs10114465, rs10114624, rs10118357, rs10132268, rs1014573, rs10147603, rs10160186, rs1020322, rs1022926, rs10229652, rs10240660, rs10241890, rs10252183, rs10267119, rs1027986, rs10280353, rs1028593, rs1040817, rs1040818, rs10455175, rs1047841, rs10485365, rs10485371, rs10485404, rs10487884, rs10491067, rs10491121, rs10491954, rs10493763, rs10493934, rs10493936, …
Endocrine and other factor-regulated calcium reabsorption	interaction, ultra	38	0.0366073	24/49	9.745e-13	486, 9365								rs11216567, rs191924, rs211252, rs2320760, rs2858977, rs2858978, rs3848093, rs385564, rs479991, rs4941701, rs4942922, rs4942924, rs516306, rs540109, rs542624, rs553791, rs554634, rs562020, rs566514, rs571118, rs576404, rs648202, rs650439, rs659117, rs677332, rs684492, rs684868, rs7988462, rs9315193, rs9315202, rs9526838, rs9527023, rs9527024, rs9535698, rs9536313, rs9536368, rs9563081, rs9568680
Hematopoietic cell lineage	pathway	1026	0.0374075	69/88	4.001e-54	290, 909, 910, 912, 913, 914, 915, 916, 920, 921, 925, 926, 928, 929, 931, 933, 945, 947, 948, 951, 952, 960, 966, 1378, 1380, 1435, 1436, 1437, 1440, 1441, 1604, 1791, 2056, 2057, 2208, 2322, 2811, 2814, 2993, 3126, 3552, 3553, 3554, 3559, 3562, 3565, 3566, 3567, 3568, 3569, 3570, 3574, 3575, 3655, 3672, 3673, 3674, 3675, 3676, 3678, 3684, 3690, 3815, 4254, 4311, 7037, 7066, 7173, 7850								rs10016073, rs10019008, rs1002655, rs1002656, rs10029931, rs10044838, rs10053847, rs10057067, rs1005834, rs10093522, rs1009897, rs1010101, rs10106730, rs1015260, rs10204515, rs10205700, rs10217110, rs1025039, rs1025192, rs10255691, rs10263896, rs1035732, rs1038034, rs10412123, rs10419722, rs10429953, rs10434440, rs1047481, rs10488809, rs10488968, rs10491434, rs10494190, rs10499563, rs10504684, rs…
Wnt signaling pathway	pathway	3866	0.0374075	134/151	2.069e-119	324, 595, 815, 816, 817, 818, 894, 896, 1387, 1452, 1454, 1457, 1459, 1487, 1488, 1499, 1857, 2033, 2239, 2535, 2932, 3725, 4040, 4041, 4087, 4088, 4089, 4316, 4609, 4772, 4773, 4775, 4776, 5330, 5331, 5332, 5467, 5515, 5518, 5519, 5525, 5527, 5528, 5529, 5530, 5532, 5533, 5534, 5567, 5568, 5578, 5579, 5582, 5599, 5601, 5602, 5613, 5663, 5879, 5880, 6093, 6422, 6423, 6424, 6425, 6477, 6500, 6885,…								rs10000775, rs10001480, rs10005635, rs10005711, rs10009286, rs10011961, rs10012684, rs10014763, rs10015062, rs10015110, rs1001950, rs10023113, rs10024003, rs10026060, rs10028834, rs10028852, rs10029339, rs10030362, rs10031040, rs10031057, rs10031159, rs10033283, rs10040841, rs1004765, rs10049173, rs10050608, rs10055448, rs10061285, rs1006355, rs10064428, rs10066581, rs10067312, rs10068589, rs1006…
Acute myeloid leukemia	interaction, high	514	0.0384077	49/58	8.953e-42	207, 208, 572, 673, 861, 1147, 2322, 2475, 2885, 3551, 3815, 4790, 5292, 5295, 5594, 5604, 6198, 6199, 6774, 6776, 6777, 8503, 10000, 23533								rs10037187, rs10040640, rs10043473, rs10056163, rs10064315, rs1006639, rs10070943, rs10071585, rs10075612, rs10078240, rs1010447, rs1015602, rs10244133, rs1026916, rs10281173, rs1033335, rs10434440, rs10460712, rs10487888, rs10515052, rs10515058, rs10515062, rs10515070, rs10515086, rs1053005, rs1057079, rs1064261, rs1076094, rs10803158, rs10803171, rs10805422, rs10805425, rs10854374, rs10927039, …
Fanconi anemia pathway	characteristic	209	0.0422084	21/54	0.001785	2175, 2176, 2177, 2178, 2187, 2188, 7398, 9894, 11201, 22909, 29089, 51426, 51455, 55215, 57599, 57697, 79728, 80010, 83990, 84126, 116028								rs10163148, rs10163438, rs10172752, rs1018119, rs10186223, rs1027710, rs10438771, rs10451012, rs10465178, rs10500928, rs10510698, rs10515211, rs10821455, rs10868107, rs10868108, rs10889325, rs10993531, rs11026626, rs11026630, rs11026663, rs11026697, rs11074989, rs11140385, rs11140449, rs11140486, rs11140489, rs1115113, rs11640295, rs11750595, rs11860060, rs12025429, rs12034108, rs120963, rs121262…
Collecting duct acid secretion	characteristic	6	0.0442088	3/27	0.4696	1188, 6521, 10723								rs11652651, rs2007471, rs2334955, rs4975552, rs6696416, rs7379059
Aminoacyl-tRNA biosynthesis	pathway	398	0.045209	35/63	2.969e-20	16, 833, 1615, 2058, 2617, 3035, 3376, 3735, 4677, 5917, 6301, 6897, 7453, 8565, 10056, 10352, 10667, 23395, 25973, 51067, 51091, 51520, 55157, 55699, 57038, 57176, 57505, 79587, 79731, 80222, 92935, 118672, 123263, 123283, 124454								rs1005417, rs10054670, rs10071837, rs1008198, rs1009606, rs10120980, rs10438233, rs10438234, rs10444899, rs10458088, rs10484314, rs10497807, rs10516047, rs10751297, rs10761149, rs10761150, rs10779396, rs10793324, rs1080, rs10844337, rs10899551, rs10902853, rs10914621, rs10923718, rs10923726, rs10923748, rs10923755, rs10923799, rs10932966, rs10939041, rs10992260, rs11052214, rs11102957, rs11130066…
Long-term potentiation	characteristic interaction, ultra	5	0.0454091	50/70	4.337e-36	5502								rs11170980, rs1144998, rs1145000, rs1157484, rs7297136
Olfactory transduction	characteristic interaction, ultra	27	0.0458092	18/388	0.9999	5132, 81399, 403257, 442184								rs10489392, rs10489396, rs10798049, rs10911871, rs10911877, rs10911886, rs10911887, rs10911902, rs11803639, rs11964365, rs12077211, rs12124257, rs12197235, rs12402521, rs12405141, rs12576395, rs12723621, rs16825681, rs2143738, rs33963275, rs4959611, rs6678912, rs6916016, rs7752270, rs9380109, rs9783017, rs9783052
Alcoholism	pathway	2182	0.0464093	105/180	5.98e-27	111, 136, 369, 468, 627, 673, 801, 805, 808, 810, 814, 1385, 1386, 1392, 1644, 1812, 1813, 2030, 2354, 2770, 2771, 2773, 2775, 2778, 2782, 2786, 2787, 2788, 2791, 2793, 2885, 2903, 2904, 2905, 2906, 3020, 3066, 3845, 4128, 4129, 4852, 4893, 4915, 5173, 5500, 5501, 5569, 5594, 5604, 5894, 6531, 6570, 6571, 6654, 6655, 8334, 8335, 8340, 8344, 8347, 8353, 8355, 8358, 8360, 8364, 8365, 8367, 8520, 89…								rs1002261, rs1003634, rs10040249, rs10052016, rs10053602, rs1005549, rs1005592, rs10057481, rs10057497, rs1006446, rs10069450, rs10070886, rs1007662, rs1008454, rs10102662, rs10103514, rs10107837, rs10110371, rs10111712, rs1011185, rs10113394, rs10115390, rs10115450, rs10115908, rs10116192, rs10116287, rs10116324, rs10118423, rs1011874, rs10120848, rs10123600, rs10123826, rs10125469, rs1012586, r…
N-Glycan biosynthesis	characteristic	13	0.0472094	2/49	0.9511	91869								rs11242, rs11714876, rs2253675, rs2564921, rs2581790, rs2581799, rs2581830, rs3796351, rs6770152, rs7615099, rs7616077, rs7622420, rs9867023
Chagas disease (American trypanosomiasis)	interaction, high	1042	0.0474095	79/104	6.475e-60	207, 208, 355, 624, 718, 915, 916, 919, 1147, 1432, 1636, 3456, 3459, 3460, 3551, 3553, 3558, 3569, 3576, 3586, 3592, 3593, 3654, 4615, 4790, 4792, 5054, 5295, 5330, 5331, 5332, 5518, 5519, 5594, 5599, 5601, 5602, 5603, 6347, 6348, 6352, 6416, 7046, 7048, 7097, 7099, 8503, 8772, 10000, 23236, 23533, 51135, 148022								rs10001480, rs10024003, rs10026060, rs10029339, rs1003199, rs10033283, rs10037187, rs10040640, rs10043473, rs10056163, rs10064315, rs10070943, rs10071585, rs10075612, rs10078240, rs10132268, rs10132489, rs10140368, rs10142830, rs10144552, rs10147603, rs10149714, rs1019855, rs1022596, rs10255691, rs10263896, rs1028593, rs1036097, rs1036307, rs1040496, rs10413435, rs10417820, rs10423794, rs10424348…
Sulfur metabolism	characteristic interaction, ultra	1	0.0478096	1/13	0.7213	6821								rs772923
SNARE interactions in vesicular transport	characteristic	221	0.0482096	19/36	4.238e-11	662, 6843, 8674, 8675, 8676, 8773, 9342, 9482, 9570, 10228, 10282, 10490, 10652, 10791, 51272, 55014, 116841, 143187								rs10120103, rs10121880, rs10123261, rs10215958, rs10217692, rs1022907, rs10248807, rs10257353, rs10264801, rs10487252, rs10494536, rs10509963, rs10509964, rs10518766, rs10521157, rs1052586, rs10797664, rs10798603, rs10819702, rs10819703, rs10885348, rs10885352, rs10885369, rs10885371, rs10885372, rs10885378, rs10910849, rs10913529, rs10916203, rs10953106, rs10953107, rs10953111, rs11064227, rs110…
Amoebiasis	interaction, high	1003	0.04981	74/106	1.024e-51	81, 87, 88, 89, 912, 929, 1511, 1992, 2335, 2919, 3553, 3554, 3569, 3576, 3586, 3592, 3593, 3684, 4790, 5055, 5269, 5272, 5273, 5275, 5295, 5330, 5331, 5332, 5567, 5568, 5613, 6317, 6318, 7097, 7099, 7850, 8503, 23236, 23533								rs1003199, rs10037187, rs10040640, rs10043473, rs10056163, rs10064315, rs10070943, rs10071585, rs10075612, rs10078240, rs1009145, rs10141794, rs1015416, rs10163726, rs1016379, rs10172425, rs10199059, rs10201850, rs10202483, rs10209954, rs10218421, rs1022596, rs10255691, rs10263896, rs1037215, rs1040496, rs10432530, rs10485720, rs10485723, rs10485727, rs10485728, rs10493750, rs10498037, rs10498039…

## Sheet: P-value filter 1.0E-5
Pathway	Analysis method	No of SNPs	P-value	PW Gene count	PW Enrichment p-value	Genes	SNPs
Allograft rejection	interaction, medium	389	<=1.0E-06	29/39	2.909e-21	355, 356, 940, 941, 942, 958, 959, 3002, 3105, 3106, 3107, 3109, 3111, 3112, 3113, 3115, 3118, 3119, 3126, 3133, 3134, 3135, 3458, 3558, 3565, 3586, 3592, 3593								rs1003199, rs10174652, rs10193976, rs1034325, rs1044429, rs10458360, rs10483286, rs10490573, rs10492201, rs10509561, rs1059174, rs1063320, rs1077433, rs10784640, rs10784663, rs10784688, rs10866712, rs10878663, rs10878678, rs10878718, rs10878719, rs10878720, rs10878733, rs10878749, rs10878775, rs10887911, rs10887918, rs10909625, rs10912276, rs1102706, rs11119447, rs11176841, rs11176878, rs11176942…
Antigen processing and presentation	interaction, ultra	220	<=1.0E-06	33/78	1.25e-13	567, 920, 925, 926, 972, 3105, 3106, 3107, 3109, 3111, 3112, 3113, 3115, 3118, 3119, 3126, 3133, 3134, 3135, 3805, 3806, 3809, 3821, 3824, 5721, 5994, 8302								rs1005834, rs1034325, rs1044429, rs1055141, rs1059174, rs1063320, rs10734826, rs10734827, rs1075835, rs1075836, rs1075838, rs10772285, rs1077433, rs10774450, rs10845089, rs10849517, rs11053712, rs11053720, rs11053751, rs11053839, rs11084372, rs12191230, rs12193110, rs12370398, rs12520101, rs1264563, rs13023213, rs1322751, rs13409176, rs13409196, rs1367731, rs1374998, rs1398130, rs1398132, rs15159…
Asthma	pathway	107	<=1.0E-06	23/31	4.353e-17	958, 959, 2205, 2206, 2207, 3109, 3111, 3112, 3113, 3115, 3118, 3119, 3126, 3562, 3565, 3567, 3578, 3586, 3596, 5553, 6037, 6356, 8288								rs1044429, rs10489849, rs10853004, rs10896615, rs11119447, rs11230161, rs12012220, rs12119226, rs12135788, rs12191230, rs12556784, rs12656759, rs1303621, rs1367731, rs1554286, rs1569723, rs16969449, rs16969457, rs17132324, rs17169344, rs17169348, rs17254457, rs17330906, rs175737, rs176248, rs17666424, rs181781, rs1883834, rs1883835, rs20541, rs2069757, rs2181135, rs2227282, rs2227284, rs2243218, …
Autoimmune thyroid disease	interaction, high	352	<=1.0E-06	43/54	3.882e-33	355, 940, 941, 942, 958, 959, 1081, 1493, 3002, 3105, 3106, 3107, 3109, 3111, 3112, 3113, 3115, 3118, 3119, 3126, 3133, 3134, 3135, 3439, 3440, 3441, 3442, 3443, 3444, 3445, 3447, 3448, 3449, 3451, 3452, 3558, 3565, 3586, 7252, 7253								rs10083503, rs10116540, rs10116615, rs10119678, rs10142999, rs10149689, rs10174652, rs10179639, rs10193976, rs1034325, rs1044429, rs10483286, rs10490573, rs10509561, rs1059174, rs1063320, rs10757219, rs1077433, rs10811497, rs10811519, rs10811523, rs10811525, rs10811527, rs10887911, rs10887918, rs10909625, rs10964878, rs10964882, rs10964930, rs10964981, rs10964985, rs11119447, rs11159480, rs112029…
Calcium signaling pathway	characteristic interaction, medium	2	<=1.0E-06	69/177	2.003e-24	7125, 80228								rs386155, rs4481505
Endocytosis	interaction, ultra	604	<=1.0E-06	78/204	8.664e-27	857, 858, 859, 998, 1436, 2060, 2263, 2264, 2321, 2348, 2352, 3105, 3106, 3107, 3133, 3134, 3135, 3560, 3791, 3815, 4914, 5156, 7037, 7251, 9135, 9727, 51028, 51534, 51652, 84440, 89853, 390243								rs10050046, rs10081624, rs1010101, rs10227696, rs10228039, rs10239692, rs1034325, rs1036940, rs10434440, rs10488849, rs10490800, rs10491513, rs1049334, rs10500062, rs10510083, rs10510085, rs10510086, rs1059174, rs1063320, rs1065483, rs10749418, rs10760419, rs10760430, rs1077433, rs1078806, rs10788134, rs10788178, rs10788183, rs10819136, rs10819146, rs10866417, rs10886868, rs10886885, rs1089425, r…
Epstein-Barr virus infection	interaction, ultra	595	<=1.0E-06	35/204	0.953	683, 952, 958, 965, 2208, 3105, 3106, 3107, 3113, 3115, 3118, 3119, 3126, 3133, 3134, 3135, 3586, 3587, 3588, 3683, 3716, 3718, 5714, 5757, 6693, 6885, 7128, 7297, 7514, 8021, 10622, 11317, 23533, 26993, 55718								rs10016073, rs10019008, rs1011170, rs1014573, rs10166046, rs10167875, rs1020322, rs10204481, rs1034325, rs1040817, rs1040818, rs10455175, rs10485365, rs10485371, rs10485404, rs10488968, rs10498972, rs10498974, rs10498977, rs10498978, rs10498982, rs10499198, rs1050567, rs1058867, rs1059174, rs1063320, rs1077433, rs10806443, rs10806445, rs10854364, rs10871449, rs10889503, rs10889504, rs10924102, rs…
Graft-versus-host disease	interaction, high	318	<=1.0E-06	27/43	6.394e-17	355, 940, 941, 942, 3002, 3105, 3106, 3107, 3109, 3111, 3112, 3113, 3115, 3118, 3119, 3126, 3133, 3134, 3135, 3552, 3553, 3558, 3569, 3821, 3824								rs10174652, rs10193976, rs10255691, rs10263896, rs1034325, rs1044429, rs10483286, rs10490573, rs10499563, rs10509561, rs1059174, rs1063320, rs10734826, rs10734827, rs10772285, rs1077433, rs10845089, rs10887911, rs10887918, rs10909625, rs10950917, rs10950919, rs11053712, rs11053720, rs11053751, rs11053839, rs11202972, rs11202989, rs1122913, rs11626395, rs11677416, rs11680809, rs11689629, rs1219123…
Herpes simplex infection	interaction, ultra	831	<=1.0E-06	60/188	0.0002813	718, 727, 972, 1616, 2969, 3105, 3106, 3107, 3109, 3111, 3112, 3113, 3115, 3118, 3119, 3126, 3133, 3134, 3135, 3150, 3439, 3440, 3441, 3442, 3443, 3444, 3445, 3447, 3448, 3449, 3451, 3452, 3454, 3455, 3456, 3459, 3460, 3553, 3569, 3592, 3593, 3716, 5818, 5819, 6429, 6430, 6431, 6885, 7297, 8683, 8740, 8764, 9569, 10929, 54205, 55998, 57506, 112950, 148022, 439996								rs1003199, rs1007369, rs1007530, rs1011170, rs10116271, rs10116540, rs10116615, rs10119678, rs1014573, rs1020322, rs10255691, rs10263896, rs10276962, rs1034325, rs1040817, rs1040818, rs1044429, rs10444338, rs10455175, rs10485365, rs10485371, rs10485404, rs10498972, rs10498974, rs10498977, rs10498978, rs10498982, rs10499563, rs10509572, rs1059174, rs1063320, rs10733650, rs10739585, rs10750152, rs1…
HTLV-I infection	interaction, ultra	495	<=1.0E-06	45/268	0.9802	915, 916, 958, 3105, 3106, 3107, 3109, 3111, 3112, 3113, 3115, 3118, 3119, 3126, 3133, 3134, 3135, 3554, 3558, 3560, 3569, 3683, 3716, 3718, 4055, 5155, 5156, 5159, 5423, 5424, 7015, 7412, 7514, 7850, 8850, 9232, 10714, 23373, 23533, 29945, 64682, 64784, 94241, 200186, 246184								rs10018583, rs10027814, rs10086541, rs10093594, rs10098453, rs10167875, rs10178648, rs10255691, rs10263896, rs1034325, rs1044429, rs10488849, rs10493934, rs10493936, rs10499563, rs1050567, rs10517073, rs10520692, rs1055044, rs1059174, rs1063320, rs1077433, rs10793091, rs10793092, rs10852133, rs10866417, rs10875333, rs10889503, rs10889504, rs10899024, rs10908557, rs10950917, rs10950919, rs10956932…
Intestinal immune network for IgA production	interaction, ultra	283	<=1.0E-06	34/49	4.283e-23	608, 940, 941, 942, 958, 959, 3109, 3111, 3112, 3113, 3115, 3118, 3119, 3126, 3558, 3565, 3569, 3586, 4055, 5284, 10673, 23308, 23495, 29851, 57379								rs10172481, rs10174652, rs10180136, rs10180781, rs10193976, rs10255691, rs10263896, rs1044429, rs10490573, rs10499563, rs10770847, rs10770856, rs10841875, rs10932036, rs10932038, rs10932047, rs10932049, rs10932053, rs10932058, rs10950917, rs10950919, rs11064153, rs11069734, rs11119447, rs1122913, rs11571300, rs11618877, rs11656859, rs11689629, rs11690070, rs11884257, rs12012220, rs12105515, rs121…
Jak-STAT signaling pathway	interaction, medium	1755	<=1.0E-06	127/155	3.932e-99	207, 208, 595, 598, 867, 868, 894, 896, 1154, 1271, 1439, 1440, 1441, 1489, 2056, 2057, 2688, 2689, 2690, 2885, 3439, 3440, 3441, 3442, 3443, 3444, 3445, 3447, 3448, 3449, 3451, 3452, 3454, 3455, 3456, 3458, 3459, 3460, 3467, 3558, 3559, 3560, 3562, 3565, 3566, 3568, 3569, 3570, 3572, 3574, 3575, 3578, 3586, 3587, 3588, 3592, 3593, 3594, 3595, 3596, 3597, 3598, 3716, 3717, 3718, 3952, 3953, 3976,…								rs1002655, rs1002656, rs1003199, rs10036224, rs10037187, rs10038062, rs10040640, rs10043473, rs10044080, rs10044838, rs10045084, rs1005017, rs10050597, rs10050889, rs10053847, rs10055279, rs10056163, rs10056553, rs10059243, rs10064315, rs10070418, rs10070943, rs10071384, rs10071585, rs10075612, rs10078240, rs10079816, rs10080135, rs1009231, rs10093522, rs10106730, rs10116352, rs10116540, rs101166…
Natural killer cell mediated cytotoxicity	interaction, ultra	392	<=1.0E-06	105/137	2.282e-76	637, 673, 919, 962, 2207, 3105, 3106, 3107, 3133, 3135, 3439, 3440, 3441, 3442, 3443, 3444, 3445, 3447, 3448, 3449, 3451, 3452, 3454, 3455, 3456, 3459, 3460, 3683, 3805, 3806, 3809, 3821, 3824, 4277, 8743, 8793, 8794, 9436, 22914, 23533, 27040, 51744, 79465, 80328, 80329, 135250, 154064, 353091, 100507436, 100528032								rs10102276, rs10111172, rs10116540, rs10116615, rs10119678, rs10244133, rs10281173, rs1034325, rs10457852, rs10487888, rs1063320, rs10734826, rs10734827, rs10752639, rs10757178, rs10757181, rs10757219, rs10772285, rs1077433, rs10811497, rs10811519, rs10811523, rs10811525, rs10811527, rs10845089, rs10908805, rs10918702, rs10964856, rs10964878, rs10964882, rs10964930, rs10964981, rs10964985, rs1105…
Phagosome	interaction, high	694	<=1.0E-06	62/156	1.316e-22	537, 718, 929, 948, 949, 1535, 1783, 2204, 2212, 3105, 3106, 3107, 3109, 3111, 3112, 3113, 3115, 3118, 3119, 3126, 3133, 3134, 3135, 3673, 3678, 3684, 3920, 4074, 4153, 4689, 4973, 6441, 7037, 7097, 7099, 7278, 10332, 10952, 22925, 23480, 29927, 30835, 51143, 51606, 53407, 55176, 64581, 78989, 81035								rs1000579, rs10009773, rs10017573, rs1006487, rs1009438, rs10113505, rs10115446, rs10121003, rs10196882, rs10210631, rs10212131, rs10215617, rs10238349, rs10244229, rs1030656, rs1034325, rs1044429, rs10492522, rs10494355, rs10516164, rs10516165, rs1053403, rs1059174, rs1063320, rs10760689, rs10773111, rs1077433, rs1078066, rs10788338, rs10819684, rs10824381, rs10824779, rs10824784, rs10845053, rs…
Rheumatoid arthritis	interaction, ultra	331	<=1.0E-06	49/92	4.656e-25	537, 940, 941, 942, 1435, 1493, 2321, 3109, 3111, 3112, 3113, 3115, 3118, 3119, 3126, 3552, 3553, 3569, 3605, 3606, 3683, 4312, 4314, 5228, 7422, 8600, 8792, 10673, 51561								rs10174652, rs10179639, rs10193976, rs1022926, rs10255691, rs10263896, rs1034375, rs1044429, rs10484879, rs10484881, rs10490573, rs10499563, rs10507507, rs10507513, rs10507514, rs10507516, rs10950917, rs10950919, rs11069734, rs11102019, rs11171806, rs11225429, rs11225434, rs1122913, rs11571292, rs11571293, rs11571304, rs11577194, rs11618877, rs11677416, rs11680809, rs11689629, rs12089727, rs12165…
Staphylococcus aureus infection	interaction, ultra	147	<=1.0E-06	24/56	1.899e-10	717, 718, 727, 728, 2204, 2212, 3109, 3111, 3112, 3113, 3115, 3118, 3119, 3126, 3586, 3683, 3684, 4153, 6403, 6404								rs10116271, rs1044429, rs10494355, rs10733650, rs10739585, rs10760135, rs10800462, rs10824381, rs10824779, rs10824784, rs10853782, rs10919203, rs10985112, rs10985126, rs10985127, rs11002340, rs11003040, rs11003084, rs11003114, rs11114011, rs11119447, rs11150610, rs11569501, rs11569507, rs11569511, rs11569536, rs11569538, rs11598427, rs11672983, rs11673207, rs1179766, rs1194659, rs1194662, rs11946…
Sulfur metabolism	characteristic interaction, ultra	2	<=1.0E-06	1/13	0.752	6821								rs705702, rs772923
Systemic lupus erythematosus	interaction, ultra	214	<=1.0E-06	57/138	7.205e-22	717, 718, 727, 940, 941, 942, 958, 959, 2212, 3109, 3111, 3112, 3113, 3115, 3118, 3119, 3126, 3586, 6738, 8335, 8344, 8347, 8353, 8355, 8358, 8360, 8364, 8365, 8367, 8968, 286436, 440093								rs10116271, rs10174652, rs10193976, rs1044429, rs10484434, rs10484435, rs10490573, rs10494355, rs10506080, rs10733650, rs10739585, rs10743769, rs10760135, rs10801173, rs10844025, rs10844055, rs10946813, rs10985112, rs10985126, rs10985127, rs11051588, rs11051643, rs11051695, rs11119447, rs1150966, rs1150990, rs11569501, rs11569507, rs11569511, rs11569536, rs11569538, rs11611197, rs11689629, rs1175…
Tuberculosis	interaction, ultra	434	<=1.0E-06	117/182	5.832e-71	537, 572, 637, 718, 805, 820, 972, 1509, 2207, 2212, 3109, 3111, 3112, 3113, 3115, 3118, 3119, 3126, 3439, 3440, 3441, 3442, 3443, 3444, 3445, 3447, 3448, 3449, 3451, 3452, 3456, 3459, 3460, 3552, 3553, 3569, 3586, 3587, 3588, 3592, 3593, 3606, 3684, 3687, 3716, 3920, 3929, 4046, 5994, 8844, 8877, 10332, 22925, 26253, 30835, 51561, 54205, 64581								rs1003199, rs10116540, rs10116615, rs10119678, rs10153674, rs10172635, rs10196882, rs10255691, rs10263896, rs10276962, rs1044429, rs10494355, rs10499563, rs1058867, rs10757178, rs10757181, rs10757219, rs10770850, rs10811497, rs10811519, rs10811523, rs10811525, rs10811527, rs10841879, rs10853147, rs10854364, rs10866712, rs10889503, rs10889504, rs10929965, rs10950917, rs10950919, rs10964856, rs1096…
Tumor viruses and cancer	interaction, ultra	320	<=1.0E-06	26/207	0.9997	572, 718, 998, 3105, 3106, 3107, 3133, 3134, 3135, 3249, 3716, 3718, 4055, 5366, 5423, 8344, 8347, 8360, 8364, 8365, 8367, 8379, 8850, 11317, 23533, 286436								rs1002169, rs1002170, rs10226475, rs10234557, rs10242452, rs10244946, rs10255204, rs10275045, rs10276536, rs10278591, rs1034325, rs10503033, rs10503034, rs10515981, rs1059174, rs1063320, rs1077433, rs10889503, rs10889504, rs10917139, rs10917145, rs10917148, rs10917152, rs10946813, rs10950377, rs11064153, rs11208559, rs11231741, rs11569501, rs11569507, rs11569511, rs11569536, rs11569538, rs1157617…
Type I diabetes mellitus	interaction, ultra	283	<=1.0E-06	27/45	3.348e-16	940, 941, 942, 1363, 3105, 3106, 3107, 3109, 3111, 3112, 3113, 3115, 3118, 3119, 3126, 3133, 3134, 3135, 3552, 3553, 3558, 3592, 3593								rs1003199, rs10050033, rs10174652, rs10193976, rs1034325, rs1044429, rs10490573, rs10517845, rs10517846, rs1059174, rs1063320, rs1077433, rs10866712, rs11677416, rs11680809, rs11689629, rs11724900, rs11728234, rs11728337, rs11732583, rs11926233, rs11928737, rs11940401, rs12191230, rs12193110, rs1246924, rs12613538, rs12635350, rs12642989, rs1264563, rs13032082, rs13032680, rs13064589, rs13102614,…
Viral myocarditis	interaction, ultra	253	<=1.0E-06	45/72	3.53e-27	637, 857, 940, 941, 942, 958, 959, 1525, 1605, 3105, 3106, 3107, 3109, 3111, 3112, 3113, 3115, 3118, 3119, 3126, 3133, 3134, 3135, 3683, 6442, 54205								rs10174652, rs10193976, rs10227696, rs10276962, rs1034325, rs1044429, rs10490573, rs1049334, rs1050088, rs1059174, rs1063320, rs1077433, rs11689629, rs11911177, rs11971170, rs12012220, rs12100401, rs12191230, rs12193110, rs12451943, rs12556784, rs12613538, rs1264563, rs12700582, rs13032082, rs13032680, rs13064589, rs1354162, rs1367731, rs1569723, rs1610593, rs1610742, rs1611381, rs1611388, rs1611…
Basal cell carcinoma	pathway	1288	0.0002	49/55	1.908e-42	324, 650, 652, 1499, 1857, 2535, 2735, 2736, 2737, 2932, 5727, 6469, 6932, 6934, 7157, 7472, 7473, 7474, 7475, 7476, 7478, 7479, 7480, 7481, 7482, 7483, 7484, 7855, 7976, 8312, 8313, 8321, 8322, 8323, 8324, 8325, 8326, 8643, 11211, 27148, 51176, 51384, 51684, 54361, 64399, 80326, 81029, 83439, 89780								rs10029738, rs1003876, rs10049173, rs10055448, rs10069134, rs1009390, rs1009609, rs1012579, rs10128675, rs10129157, rs10132541, rs10136885, rs10137772, rs10144925, rs10147611, rs10151226, rs10165984, rs10174520, rs10193725, rs10205484, rs10229523, rs10234444, rs10237371, rs10241082, rs10241688, rs10241947, rs10242164, rs10242792, rs10243298, rs10244735, rs10244786, rs10248949, rs10249530, rs10250…
Cytokine-cytokine receptor interaction	pathway	3900	0.0002	216/265	1.092e-168	90, 91, 92, 93, 355, 356, 608, 643, 650, 655, 657, 658, 659, 943, 944, 958, 959, 970, 1230, 1232, 1233, 1234, 1235, 1236, 1237, 1271, 1435, 1436, 1437, 1439, 1440, 1441, 1489, 1524, 1896, 1950, 1956, 2056, 2057, 2277, 2321, 2322, 2324, 2688, 2689, 2690, 2829, 2919, 2920, 3082, 3439, 3440, 3441, 3442, 3443, 3444, 3445, 3447, 3448, 3449, 3451, 3452, 3454, 3455, 3456, 3458, 3459, 3460, 3467, 3552, 3…								rs10000203, rs10000241, rs10005096, rs1000515, rs10005450, rs10006293, rs10006360, rs10006747, rs10008126, rs10012879, rs10016230, rs10017471, rs10017970, rs10018731, rs10018945, rs1002084, rs10022682, rs10023994, rs1002655, rs1002656, rs10027656, rs10027875, rs10029166, rs10029654, rs10029718, rs1003199, rs10033375, rs10036224, rs10038062, rs10038760, rs10044080, rs10044838, rs10045084, rs100496…
Toxoplasmosis	interaction, ultra	538	0.0002	100/133	2.564e-71	572, 958, 959, 3109, 3111, 3112, 3113, 3115, 3118, 3119, 3126, 3459, 3460, 3586, 3587, 3588, 3592, 3593, 3716, 5319, 5320, 5322, 6885, 7297, 8681, 23533, 26279, 30814, 54205, 64600, 81579, 84647, 345611, 391013								rs1003199, rs1011170, rs1014573, rs1020322, rs10276962, rs1040817, rs1040818, rs1044429, rs10455175, rs10485365, rs10485371, rs10485404, rs10498972, rs10498974, rs10498977, rs10498978, rs10498982, rs1058867, rs10753482, rs10799612, rs10806443, rs10806445, rs10854364, rs10866712, rs10889503, rs10889504, rs10916679, rs10916685, rs10916711, rs10944485, rs10944560, rs10944606, rs10944640, rs11000486,…
Hedgehog signaling pathway	interaction, medium	1371	0.0004	48/56	7.646e-40	650, 652, 653, 654, 655, 656, 1452, 1454, 1455, 1456, 2619, 2735, 2736, 2737, 2932, 5567, 5568, 5613, 5727, 7472, 7473, 7474, 7475, 7476, 7478, 7479, 7480, 7481, 7482, 7483, 7484, 7546, 8643, 8945, 23291, 27148, 51384, 51684, 51715, 53944, 54361, 64399, 80326, 81029, 89780, 122011, 353500								rs10029738, rs10038345, rs1003876, rs10040841, rs10043440, rs1004434, rs10049173, rs10055109, rs10055291, rs10061285, rs10063876, rs10064428, rs10067312, rs10068589, rs10069013, rs10070979, rs10085115, rs10120212, rs10124274, rs10129157, rs10132541, rs10136885, rs10137772, rs10144925, rs10147611, rs10151226, rs1015985, rs1016379, rs10193725, rs10218421, rs10229523, rs1023114, rs10234444, rs102373…
Butanoate metabolism	interaction, ultra	7	0.0006	2/30	0.8241	79944								rs12432105, rs4901000, rs4901008, rs737077, rs8013174, rs8013289, rs910641
Chemokine signaling pathway	interaction, high	2361	0.0006	141/189	1.066e-99	157, 207, 208, 643, 673, 998, 1147, 1230, 1232, 1233, 1234, 1235, 1236, 1237, 1398, 1399, 1524, 2268, 2786, 2787, 2788, 2791, 2793, 2829, 2868, 2869, 2870, 2885, 2919, 2920, 2932, 3055, 3551, 3576, 3577, 3579, 3702, 3717, 3718, 4067, 4283, 4790, 4792, 4793, 5058, 5196, 5197, 5295, 5330, 5331, 5332, 5473, 5567, 5568, 5594, 5604, 5613, 6093, 6346, 6347, 6348, 6351, 6352, 6354, 6355, 6356, 6357, 635…								rs10000203, rs10000241, rs10006360, rs1000927, rs10012879, rs10016230, rs1002084, rs10037187, rs10038760, rs10040640, rs10043473, rs10054204, rs10056163, rs10064315, rs10070943, rs10071585, rs10075612, rs1007662, rs10078240, rs10079961, rs1008454, rs1008673, rs10089762, rs10100561, rs10116352, rs10119004, rs10119727, rs10131301, rs10132268, rs10138800, rs1014157, rs1014638, rs10147603, rs10147986…
Leishmaniasis	interaction, high	669	0.0006	52/73	1.454e-35	718, 1378, 1432, 1535, 2212, 3109, 3111, 3112, 3113, 3115, 3118, 3119, 3126, 3459, 3460, 3552, 3553, 3565, 3586, 3592, 3593, 3654, 3676, 3684, 3716, 3717, 4615, 4689, 4790, 4792, 4793, 5594, 5603, 6772, 6885, 7097, 7099, 51135								rs1003199, rs1011170, rs10116352, rs10119004, rs10132268, rs1014573, rs10147603, rs10199181, rs1020322, rs10205700, rs1028593, rs1038034, rs1040817, rs1040818, rs10429953, rs1044429, rs10455175, rs10485365, rs10485371, rs10485404, rs10494355, rs10498972, rs10498974, rs10498977, rs10498978, rs10498982, rs10758666, rs10779340, rs10806443, rs10806445, rs10815101, rs10815110, rs10815124, rs10815144, …
T cell receptor signaling pathway	pathway	2244	0.0010002	93/108	9.597e-77	207, 208, 867, 868, 915, 916, 919, 920, 925, 926, 940, 959, 998, 1019, 1147, 1326, 1432, 1437, 1493, 1739, 2353, 2534, 2885, 2932, 3458, 3551, 3558, 3565, 3567, 3586, 3702, 3725, 3845, 3932, 3937, 4690, 4772, 4773, 4775, 4776, 4790, 4792, 4793, 4893, 5058, 5062, 5063, 5163, 5290, 5291, 5293, 5294, 5295, 5335, 5530, 5532, 5533, 5534, 5588, 5594, 5601, 5603, 5604, 5788, 5894, 5970, 6654, 6655, 6885…								rs10005711, rs10011961, rs10030362, rs10031159, rs10037187, rs10040640, rs10043473, rs1004725, rs10050695, rs10056163, rs1005834, rs1006355, rs10064315, rs10068619, rs10070943, rs1007126, rs10071585, rs10075612, rs10078240, rs10079961, rs1011170, rs1011185, rs10119727, rs10129564, rs10132268, rs10132979, rs10133192, rs10135572, rs10145260, rs1014573, rs10147603, rs10159308, rs10172481, rs10174652…
RNA transport	characteristic	778	0.00140028	69/153	5.541e-29	1207, 1967, 1968, 1974, 1983, 2332, 5903, 5905, 6612, 6613, 7341, 8087, 8487, 8563, 8661, 8662, 8664, 8665, 8666, 8891, 8892, 8893, 8894, 9631, 9669, 9688, 9818, 9972, 10073, 10289, 10419, 10460, 10605, 10762, 11097, 11102, 11171, 11218, 11260, 23165, 23225, 23279, 23511, 25929, 50628, 51095, 51808, 53371, 54960, 55520, 55706, 55746, 57122, 57510, 60528, 79023, 79760, 79833, 79897, 80145, 81929, …								rs1005451, rs10059993, rs10063061, rs1010303, rs1011927, rs1012545, rs10145743, rs10153318, rs1015361, rs10166594, rs10168517, rs10173357, rs10174893, rs10176091, rs10176508, rs10176567, rs10176594, rs10183564, rs10188396, rs10190171, rs10190898, rs1019265, rs1019283, rs10197130, rs10202074, rs10203961, rs10204803, rs10207503, rs10209275, rs10209643, rs10221121, rs10224307, rs10232205, rs1023576,…
Osteoclast differentiation	interaction, high	1501	0.00220044	89/128	1.217e-58	207, 208, 695, 814, 1147, 1432, 1435, 1436, 1535, 2212, 2534, 2885, 3454, 3455, 3456, 3459, 3460, 3551, 3552, 3553, 3554, 3716, 3932, 3937, 4689, 4790, 4792, 4982, 5295, 5336, 5594, 5599, 5601, 5602, 5603, 5604, 5608, 6772, 6850, 6885, 7006, 7046, 7048, 7297, 8503, 8600, 8651, 8792, 9020, 9021, 9846, 10000, 10326, 10990, 11006, 11024, 11026, 11027, 23533, 23547, 29760, 55423, 79168, 140885								rs10001480, rs10024003, rs10026060, rs10029339, rs10033283, rs10037187, rs10040249, rs10040640, rs10043473, rs10050695, rs10056163, rs10064315, rs10068619, rs10070943, rs10071585, rs10075612, rs10078240, rs1007837, rs1010101, rs1011170, rs10112537, rs10114465, rs10114624, rs10132268, rs1013996, rs1014573, rs10147603, rs1019855, rs10199181, rs1020322, rs1022649, rs1022926, rs1028593, rs1036097, rs…
Galactose metabolism	pathway	554	0.00240048	23/27	1.479e-19	231, 2538, 2548, 2585, 2595, 2645, 2683, 2717, 2720, 3098, 3099, 3101, 3906, 3938, 5211, 5213, 5214, 5236, 6476, 7360, 8972, 55276, 57016, 57818, 80201								rs10028206, rs10047370, rs10113903, rs1015204, rs10232478, rs1023431, rs10263438, rs1027793, rs1032206, rs1038810, rs1041598, rs1042712, rs10466265, rs10493350, rs1049392, rs10496195, rs10517423, rs10518763, rs1053000, rs1065765, rs10751831, rs10751864, rs10751876, rs10751884, rs10751898, rs10758189, rs10758198, rs10762277, rs10783269, rs10783270, rs10789146, rs10794818, rs10794864, rs10794865, r…
Influenza A	interaction, ultra	366	0.00380076	104/176	7.27e-58	3109, 3111, 3112, 3113, 3115, 3118, 3119, 3126, 3439, 3440, 3441, 3442, 3443, 3444, 3445, 3447, 3448, 3449, 3451, 3452, 3454, 3455, 3456, 3459, 3460, 3552, 3553, 3569, 3592, 3593, 3606, 3716, 7297, 7514, 7919, 8743, 8793, 8794, 23533, 54205, 55998, 57506, 90865, 148022								rs1003199, rs10102276, rs10111172, rs10116540, rs10116615, rs10119678, rs10167875, rs10255691, rs10263896, rs10276962, rs1044429, rs10499563, rs1050567, rs10757178, rs10757181, rs10757219, rs10758741, rs10811497, rs10811519, rs10811523, rs10811525, rs10811527, rs10815347, rs10866712, rs10889503, rs10889504, rs10950917, rs10950919, rs10964856, rs10964878, rs10964882, rs10964930, rs10964981, rs1096…
Pertussis	pathway	669	0.0040008	61/75	3.526e-28	710, 712, 713, 716, 717, 718, 722, 725, 727, 801, 805, 808, 810, 834, 836, 840, 929, 1072, 1073, 1432, 2353, 2770, 2771, 2773, 3394, 3552, 3553, 3569, 3576, 3586, 3592, 3593, 3654, 3659, 3678, 3684, 3688, 3689, 3725, 4615, 4790, 4843, 5594, 5599, 5601, 5602, 5603, 5970, 6372, 6374, 7099, 7189, 10392, 23643, 51135, 51561, 51806, 114548, 114609, 148022, 353376								rs10001480, rs10024003, rs10026060, rs10029339, rs1003199, rs10033283, rs10116271, rs10129564, rs10132599, rs10132979, rs10133192, rs10135572, rs10139660, rs10151959, rs10153674, rs10159308, rs10172635, rs10229737, rs10241877, rs10244538, rs10255691, rs10263896, rs10268519, rs10274707, rs10277713, rs1032596, rs10399826, rs1046864, rs10480799, rs10494890, rs10499563, rs10499847, rs10509984, rs1051…
Cell adhesion molecules (CAMs)	pathway	5244	0.00520104	111/136	2.791e-86	214, 914, 920, 923, 925, 926, 933, 940, 941, 942, 947, 958, 959, 965, 999, 1000, 1001, 1002, 1003, 1013, 1272, 1364, 1365, 1462, 1493, 2734, 3105, 3106, 3107, 3109, 3111, 3112, 3113, 3115, 3118, 3119, 3126, 3133, 3134, 3135, 3385, 3655, 3676, 3680, 3683, 3684, 3685, 3688, 3689, 3695, 3696, 4099, 4267, 4359, 4684, 4685, 4756, 4897, 5010, 5175, 5788, 5792, 5797, 5818, 5819, 6382, 6383, 6385, 6401, …								rs1000625, rs1001162, rs1002715, rs10045126, rs10047413, rs10049325, rs1005388, rs1005834, rs10059489, rs1006644, rs1006826, rs1006832, rs1006833, rs1007304, rs1007369, rs1007530, rs10081247, rs10081857, rs10082977, rs1008434, rs10084595, rs10085952, rs10086882, rs1009737, rs1009897, rs10099072, rs10100191, rs10110591, rs1011275, rs10114060, rs10118693, rs10121158, rs10122089, rs10122509, rs10127…
Vasopressin-regulated water reabsorption	characteristic interaction, ultra	15	0.00540108	19/44	1.244e-08	10671, 51626, 84516								rs10106278, rs10503863, rs10954971, rs11996929, rs12541729, rs16876889, rs2938234, rs2958750, rs2958757, rs3792008, rs3792009, rs3792020, rs4148196, rs6994064, rs8043812
Measles	interaction, high	1403	0.0060012	101/134	3.287e-72	207, 208, 355, 868, 915, 916, 940, 1017, 1019, 1021, 1147, 1457, 1459, 1796, 2534, 2932, 3439, 3440, 3441, 3442, 3443, 3444, 3445, 3447, 3448, 3449, 3451, 3452, 3454, 3455, 3456, 3459, 3460, 3552, 3553, 3558, 3559, 3560, 3565, 3569, 3592, 3593, 3596, 3654, 3716, 3717, 3718, 4068, 4615, 4790, 4792, 4793, 5295, 5610, 6504, 6772, 6774, 6776, 6777, 6869, 6885, 7097, 7099, 7128, 7157, 7161, 7297, 8503…								rs1003199, rs10037187, rs1003827, rs10040640, rs10043473, rs10056163, rs10064315, rs10070943, rs10071585, rs10075612, rs10078240, rs10102276, rs10111172, rs1011170, rs10116352, rs10116540, rs10116615, rs10119004, rs10119678, rs10132268, rs1014573, rs10147603, rs10168354, rs10174652, rs10193976, rs10194748, rs10199181, rs1020322, rs10203484, rs10208470, rs1022649, rs10230949, rs10234981, rs1025569…
Drug metabolism	characteristic interaction, ultra	3	0.00960192	1/51	1	7172								rs11964408, rs2842950, rs2859778
Sphingolipid metabolism	pathway	916	0.0110022	34/40	2.692e-28	410, 427, 2531, 2581, 2629, 2717, 2720, 4759, 6609, 7357, 7368, 8560, 8611, 8612, 8613, 8877, 8879, 9331, 9514, 9517, 10558, 10825, 29956, 55304, 55331, 55512, 56624, 64781, 79603, 91012, 123099, 125981, 130367, 166929, 204219, 253782, 259230, 339221, 340485								rs10008418, rs10019345, rs10021742, rs1002666, rs10108779, rs10112857, rs10118371, rs10119829, rs10120186, rs10123805, rs10132895, rs10135955, rs10139003, rs10140584, rs10143139, rs10147424, rs10166668, rs10174987, rs10179586, rs10186450, rs10189316, rs10197969, rs1020572, rs10213347, rs1022560, rs1022561, rs1023431, rs1029340, rs1030561, rs1039296, rs10485759, rs10489776, rs10490964, rs10493186,…
Cocaine addiction	pathway	1542	0.0114023	39/50	2.575e-17	111, 468, 627, 1020, 1385, 1386, 1644, 1742, 1812, 1813, 2354, 2770, 2771, 2773, 2778, 2891, 2903, 2904, 2905, 2906, 2913, 3725, 4128, 4129, 4790, 5173, 5567, 5568, 5613, 5970, 6531, 6570, 6571, 8787, 9586, 64764, 84699, 90993, 116443								rs10000610, rs10004211, rs10011455, rs10031554, rs1003407, rs10052016, rs10053602, rs1005549, rs10057481, rs10057497, rs10069450, rs10070886, rs1010271, rs10107837, rs10115450, rs10116192, rs10120848, rs10123826, rs1012586, rs1013264, rs1013548, rs10159308, rs1016181, rs1016379, rs10172070, rs1017685, rs10180144, rs1018077, rs1018078, rs10218421, rs10219275, rs10224250, rs10225559, rs10225574, rs…
Shigellosis	pathway	957	0.0116023	52/62	4.539e-42	25, 60, 71, 391, 960, 998, 1147, 1398, 1399, 1432, 1729, 1793, 2017, 3059, 3551, 3576, 3678, 3688, 4790, 4792, 4793, 5217, 5594, 5599, 5601, 5602, 5603, 5879, 5970, 6093, 6714, 7307, 7322, 7414, 7454, 8767, 8936, 8945, 8976, 9474, 9475, 9844, 10092, 10094, 10109, 10163, 10392, 10459, 10552, 23291, 64127, 81873, 375189								rs10001480, rs10024003, rs10026060, rs10029339, rs10033283, rs10040841, rs10061285, rs1006217, rs10064428, rs10067312, rs10068589, rs10069013, rs10087008, rs10103760, rs10106118, rs1012116, rs10132268, rs10147603, rs1016321, rs10167277, rs1017148, rs10171839, rs1018552, rs10198045, rs10205944, rs10218871, rs10224438, rs10238916, rs10239693, rs10255208, rs1025641, rs10256450, rs10257460, rs1026231…
Alcoholism	pathway	2190	0.0124025	105/180	5.98e-27	111, 136, 369, 468, 627, 673, 801, 805, 808, 810, 814, 1385, 1386, 1392, 1644, 1812, 1813, 2030, 2354, 2770, 2771, 2773, 2775, 2778, 2782, 2786, 2787, 2788, 2791, 2793, 2885, 2903, 2904, 2905, 2906, 3020, 3066, 3845, 4128, 4129, 4852, 4893, 4915, 5173, 5500, 5501, 5569, 5594, 5604, 5894, 6531, 6570, 6571, 6654, 6655, 8334, 8335, 8340, 8344, 8347, 8353, 8355, 8358, 8360, 8364, 8365, 8367, 8520, 89…								rs1002261, rs1003634, rs10040249, rs10052016, rs10053602, rs1005549, rs1005592, rs10057481, rs10057497, rs1006446, rs10069450, rs10070886, rs1007662, rs1008454, rs10102662, rs10103514, rs10107837, rs10110371, rs10111712, rs1011185, rs10113394, rs10115390, rs10115450, rs10115908, rs10116192, rs10116287, rs10116324, rs10118423, rs1011874, rs10120848, rs10123600, rs10123826, rs10125469, rs1012586, r…
MAPK signaling pathway	characteristic	756	0.0132026	165/268	8.536e-96	1844, 1845, 1846, 1847, 1849, 1852, 3925, 4296, 4763, 5494, 5495, 5536, 5801, 5924, 6788, 8491, 8550, 9175, 9344, 9448, 9693, 11072, 11221, 23162, 23542, 51295, 51347, 56940, 57551, 80824, 84867, 115727								rs10004343, rs10008908, rs10011041, rs10011799, rs10016149, rs10017696, rs10021604, rs10022176, rs10025071, rs10025560, rs10027110, rs10031882, rs10050099, rs10099079, rs10099976, rs10099978, rs10105045, rs10110413, rs1012226, rs10142834, rs10171484, rs1017574, rs10180864, rs1018218, rs10194088, rs1020720, rs1020721, rs10208929, rs1024782, rs1026514, rs1031675, rs1033732, rs1034017, rs1034018, rs…
ABC transporters	pathway	718	0.0142028	41/44	1.253e-37	19, 20, 21, 24, 215, 225, 368, 1080, 1244, 4363, 5243, 5244, 5825, 5826, 6833, 6890, 6891, 8647, 8714, 9429, 9619, 10057, 10060, 10257, 10349, 10350, 10351, 11194, 23456, 23457, 23460, 23461, 26154, 64137, 64240, 64241, 85320, 89845, 94160, 154664, 340273								rs1000002, rs1004301, rs1004302, rs1012371, rs1014235, rs10177417, rs10186294, rs10187636, rs10198064, rs10200158, rs10226404, rs10227179, rs10234192, rs10234238, rs10236551, rs10240195, rs10243683, rs1024598, rs10248242, rs10255612, rs10256255, rs10260049, rs10261964, rs10264990, rs10266329, rs10267753, rs10273407, rs10276036, rs10276319, rs10276916, rs10280101, rs10280418, rs10280481, rs1031219…
NOD-like receptor signaling pathway	pathway	875	0.0170034	46/59	1.309e-34	330, 834, 838, 841, 1147, 1432, 2919, 2920, 3320, 3326, 3551, 3553, 3569, 3576, 3606, 4210, 4790, 4792, 4793, 5594, 5599, 5601, 5602, 5603, 5970, 6347, 6352, 6885, 7128, 7184, 7189, 8767, 9051, 10392, 10454, 22861, 22900, 23118, 55914, 58484, 59082, 64127, 84674, 114548, 257397								rs10001480, rs1001676, rs10024003, rs10026060, rs10029339, rs10033283, rs10055584, rs10057505, rs10087008, rs10103760, rs10106118, rs1011170, rs1012116, rs10132268, rs1013276, rs1013277, rs1014573, rs10147603, rs1018281, rs1020322, rs1022197, rs1022198, rs10255691, rs10263896, rs1028593, rs10399826, rs10406657, rs10407902, rs1040817, rs1040818, rs10410339, rs10420505, rs10421339, rs10429371, rs10…
B cell receptor signaling pathway	interaction, high	767	0.0190038	59/75	1.787e-44	207, 208, 695, 933, 971, 974, 1147, 1380, 2885, 2932, 3551, 3635, 4067, 4790, 4792, 4793, 5295, 5336, 5594, 5604, 6850, 7409, 7410, 8503, 8915, 10000, 10451, 23533, 27071, 29760, 84433, 118788								rs10031708, rs10037187, rs10040640, rs10043473, rs10056163, rs10064315, rs10070943, rs10071585, rs10075612, rs10078240, rs10089762, rs10100561, rs10114465, rs10114624, rs10119727, rs10132268, rs10147603, rs10210302, rs10218891, rs10229652, rs10240660, rs10241890, rs10252183, rs10267119, rs1027986, rs10280353, rs1028593, rs10443202, rs10487884, rs10491067, rs10493763, rs10494080, rs10494081, rs104…
Bacterial invasion of epithelial cells	interaction, ultra	234	0.0204041	52/71	1.431e-36	857, 858, 859, 998, 9844, 10092, 10109, 23533, 81873								rs1016321, rs1017148, rs10171839, rs10224438, rs10227696, rs10228039, rs10238916, rs10239692, rs10239693, rs10255208, rs10256450, rs10257460, rs10267165, rs10268319, rs10274668, rs10277512, rs10279544, rs10282309, rs1035582, rs1035690, rs10488021, rs10488031, rs10490800, rs1049334, rs10500062, rs1051358, rs1078496, rs10917139, rs10917145, rs10917148, rs10917152, rs10951500, rs10953817, rs10986471…
Tight junction	characteristic interaction, medium	811	0.0206041	64/133	5.446e-29	3993, 5865, 6709, 8573, 8777, 9223, 9863, 10207, 93643, 154810, 260425								rs10085711, rs10115052, rs1011531, rs10121700, rs10122431, rs10127438, rs1013571, rs1014797, rs10224972, rs10225262, rs10226001, rs10228945, rs10228963, rs10229458, rs10230190, rs1023192, rs10238177, rs10238963, rs10240204, rs10242409, rs10243883, rs10245130, rs10245751, rs10246978, rs10248584, rs10251504, rs10251915, rs10252237, rs10255710, rs10259881, rs10260177, rs10260232, rs10264526, rs10266…
Melanogenesis	pathway	2534	0.0208042	90/101	2.87e-77	107, 108, 109, 111, 112, 113, 114, 115, 434, 801, 805, 808, 810, 815, 816, 817, 818, 1385, 1387, 1499, 1638, 1857, 1906, 1910, 2033, 2535, 2770, 2771, 2773, 2775, 2776, 2778, 2932, 3815, 3845, 4157, 4254, 4286, 4893, 5330, 5331, 5332, 5443, 5567, 5568, 5578, 5579, 5582, 5594, 5604, 5613, 5894, 6932, 6934, 7299, 7306, 7472, 7473, 7474, 7475, 7476, 7478, 7479, 7480, 7481, 7482, 7483, 7484, 7855, 79…								rs10000775, rs10005635, rs10009286, rs10012684, rs1001497, rs10015062, rs10015110, rs10023113, rs10031040, rs10035541, rs10036787, rs10049173, rs10050608, rs10053728, rs10055448, rs10063966, rs10066581, rs10068942, rs10087741, rs10093375, rs10095393, rs10095524, rs1009609, rs10097218, rs10104127, rs1010544, rs10108431, rs1011185, rs10112018, rs10114316, rs10118338, rs10118714, rs1012579, rs101286…
Olfactory transduction	characteristic interaction, ultra	28	0.0216043	18/388	1	5132, 81399, 403257, 442184								rs10489392, rs10489396, rs10798049, rs10911871, rs10911877, rs10911886, rs10911887, rs10911902, rs11803639, rs11964365, rs12077211, rs12124257, rs12197235, rs12402521, rs12405141, rs12576395, rs12723621, rs16825681, rs2143738, rs3131091, rs33963275, rs4959611, rs6678912, rs6916016, rs7752270, rs9380109, rs9783017, rs9783052
Ribosome	characteristic interaction, ultra	1	0.0216043	1/92	0.9999	6171								rs1689512
TGF-beta signaling pathway	pathway	2019	0.025205	73/85	3.291e-60	90, 92, 93, 650, 652, 653, 654, 655, 656, 657, 658, 659, 1387, 1634, 1874, 1875, 2033, 3397, 3398, 3399, 3400, 3458, 3624, 3625, 3626, 4052, 4086, 4087, 4088, 4089, 4090, 4091, 4092, 4093, 4609, 4838, 5308, 5515, 5518, 5519, 5594, 5933, 5934, 6093, 6198, 6199, 6500, 6667, 7027, 7042, 7043, 7044, 7046, 7048, 7057, 7058, 7060, 8200, 8454, 8646, 9241, 9372, 9475, 9765, 9978, 10468, 10637, 57154, 647…								rs10000873, rs10003405, rs10005096, rs10005450, rs10008126, rs10015214, rs10018945, rs10027656, rs1003492, rs1004765, rs10049681, rs10050107, rs10056474, rs10064147, rs1007007, rs1007239, rs1007518, rs10083047, rs10083048, rs10096521, rs10104165, rs10106754, rs1012249, rs10129157, rs10132541, rs10136885, rs10137772, rs1014064, rs10144925, rs10147611, rs10151226, rs10155491, rs1015985, rs10162965,…
Homologous recombination	characteristic	149	0.0264053	11/28	4.091e-05	4683, 5890, 5892, 5893, 7516, 8438, 25788								rs10109454, rs10130919, rs10132294, rs10133262, rs10138140, rs10143455, rs10146321, rs10146772, rs10248434, rs10248766, rs10483810, rs10849605, rs10952367, rs10956914, rs11158719, rs11158730, rs11158757, rs11158758, rs11158762, rs11571435, rs11571468, rs11623355, rs11624164, rs11624166, rs11624333, rs11627646, rs11628653, rs11846344, rs11850191, rs12431919, rs1274643, rs12889206, rs12889666, rs12…
Toll-like receptor signaling pathway	characteristic interaction, high	1	0.0276055	79/102	2.939e-58	51311								rs5979785
Huntington's disease	pathway	2069	0.0280056	121/183	1.565e-75	160, 161, 163, 291, 292, 293, 317, 498, 509, 517, 518, 539, 627, 836, 841, 842, 1175, 1211, 1213, 1327, 1337, 1345, 1350, 1351, 1385, 1387, 1639, 1742, 2033, 2776, 2904, 2911, 2915, 3064, 3066, 3092, 3708, 4694, 4696, 4697, 4698, 4700, 4702, 4704, 4705, 4706, 4710, 4712, 4716, 4718, 4719, 4720, 4723, 4724, 4725, 4726, 4728, 4729, 4731, 4899, 5330, 5331, 5332, 5430, 5431, 5432, 5433, 5434, 5468, 5…								rs1000061, rs10005129, rs10007750, rs10010833, rs10015979, rs10020457, rs10021254, rs10023088, rs10026915, rs10032829, rs10040756, rs10040791, rs10051603, rs1005549, rs10059571, rs10065919, rs1007573, rs10092898, rs1009295, rs10125115, rs1012586, rs10128881, rs10131139, rs1013548, rs10138608, rs10140498, rs10150596, rs10150617, rs10164229, rs10172070, rs10178101, rs10180144, rs10181407, rs1018945…
Butirosin and neomycin biosynthesis	pathway	67	0.0294059	5/5	1.081e-05	2645, 3098, 3099, 3101, 80201								rs1027793, rs1032206, rs10496195, rs10762277, rs10823333, rs10823349, rs10823356, rs10865404, rs10998679, rs10998744, rs11126440, rs11686654, rs12989728, rs1303722, rs13384240, rs1472814, rs1545522, rs1565064, rs1565068, rs17010530, rs17832252, rs1867971, rs2021753, rs2041835, rs205618, rs205619, rs205637, rs205638, rs205645, rs2171385, rs2300586, rs28362967, rs363617, rs363624, rs363625, rs37323…
Pathways in cancer	pathway	8136	0.0304061	288/327	3.178e-247	25, 207, 208, 324, 330, 331, 332, 354, 355, 356, 367, 369, 405, 572, 595, 596, 598, 613, 637, 650, 652, 673, 675, 836, 841, 842, 861, 862, 867, 868, 898, 998, 999, 1017, 1019, 1021, 1026, 1027, 1029, 1050, 1147, 1282, 1284, 1286, 1288, 1387, 1398, 1399, 1436, 1441, 1487, 1488, 1495, 1496, 1499, 1612, 1630, 1857, 1869, 1870, 1871, 1950, 1956, 2033, 2034, 2064, 2113, 2122, 2246, 2247, 2248, 2249, 2…								rs10001480, rs10006293, rs10006747, rs1001497, rs10016658, rs10024003, rs10025495, rs10026060, rs1002655, rs1002656, rs10029166, rs10029339, rs10029654, rs10029738, rs10033283, rs10037187, rs10038162, rs1003827, rs1003876, rs10040640, rs10043473, rs10043478, rs10045029, rs1004720, rs1004765, rs10049173, rs10049776, rs10055448, rs10056163, rs10062952, rs10064315, rs10064637, rs10065728, rs1006607,…
Adipocytokine signaling pathway	pathway	1255	0.0340068	59/69	1.325e-48	32, 207, 208, 948, 1147, 1374, 1375, 2180, 2181, 2182, 2475, 2538, 3551, 3667, 3717, 3952, 3953, 4790, 4792, 4793, 4852, 5105, 5106, 5443, 5465, 5562, 5563, 5564, 5565, 5588, 5599, 5601, 5602, 5781, 5970, 6256, 6257, 6258, 6513, 6517, 6774, 7133, 7186, 8471, 8660, 9021, 9370, 10000, 10645, 10891, 23205, 23305, 51422, 51703, 57818, 79602, 81616, 84254, 126129								rs10001480, rs10007750, rs10010833, rs10020457, rs10021219, rs10024003, rs10026060, rs10029339, rs10032829, rs10032937, rs10033283, rs10033885, rs1003634, rs1005592, rs10062565, rs10074987, rs10074991, rs1010447, rs10116352, rs10118518, rs10119004, rs1012731, rs10128072, rs10132268, rs1014677, rs10147603, rs1015249, rs10158279, rs10158937, rs1016331, rs10179260, rs10187044, rs10189760, rs10195273…
Protein digestion and absorption	characteristic	413	0.0346069	33/81	4.493e-13	1297, 1298, 1299, 1303, 1306, 1308, 1803, 2006, 4224, 4225, 5547, 6510, 6519, 6520, 6564, 7373, 7512, 8645, 9056, 10008, 11136, 23428, 80781, 117247, 206358, 643834								rs10087151, rs10104973, rs10143650, rs1014444, rs1014445, rs10150592, rs1015089, rs10174056, rs10185151, rs10194161, rs1023249, rs10456468, rs10459044, rs10498896, rs10502585, rs10505376, rs10505377, rs10505379, rs10512261, rs10512262, rs1060043, rs10736756, rs10792660, rs10792662, rs10793085, rs10819392, rs10819587, rs10898038, rs10898052, rs10898989, rs10945208, rs10945225, rs10955953, rs109559…
NF-kappa B signaling pathway	interaction, high	1149	0.0354071	52/92	2.415e-13	330, 331, 596, 598, 695, 929, 958, 959, 1147, 1457, 1459, 2920, 3551, 3553, 3554, 3576, 3654, 3929, 3932, 4055, 4067, 4615, 4790, 4792, 5335, 5336, 6351, 6357, 6363, 6387, 6850, 6885, 7099, 7128, 7185, 7412, 7535, 8600, 8737, 8740, 8792, 8915, 9020, 10673, 23085, 27040, 29760, 51135, 84433, 114609, 148022, 353376								rs10089762, rs10100561, rs1011170, rs10114465, rs10114624, rs10118357, rs10132268, rs1014573, rs10147603, rs10160186, rs1020322, rs1022926, rs10229652, rs10240660, rs10241890, rs10252183, rs10267119, rs1027986, rs10280353, rs1028593, rs1040817, rs1040818, rs10455175, rs1047841, rs10485365, rs10485371, rs10485404, rs10487884, rs10491067, rs10491121, rs10491954, rs10493763, rs10493934, rs10493936, …
Dilated cardiomyopathy	pathway	3135	0.0356071	80/90	1.501e-68	60, 70, 71, 107, 108, 109, 111, 112, 113, 114, 115, 153, 775, 776, 779, 781, 782, 783, 784, 785, 786, 1605, 1674, 1756, 2778, 3479, 3655, 3672, 3673, 3674, 3675, 3676, 3678, 3679, 3680, 3685, 3688, 3690, 3691, 3693, 3694, 3695, 3696, 3908, 4000, 4607, 4624, 4625, 4633, 4634, 5567, 5568, 5613, 6262, 6442, 6443, 6444, 6445, 6546, 7042, 7043, 7139, 7168, 7169, 7170, 7171, 7273, 8515, 8516, 9254, 103…								rs1000014, rs1002671, rs10035541, rs10036164, rs1003617, rs10036440, rs10036787, rs1003738, rs10038971, rs10039324, rs10044804, rs10045068, rs10048831, rs10049174, rs10049380, rs1005213, rs10053728, rs1005381, rs10056289, rs10057067, rs10061798, rs10063966, rs10064971, rs1006737, rs10068942, rs10073394, rs10076488, rs10077734, rs1007856, rs10082812, rs10087741, rs10093375, rs10095393, rs10095524,…
Endocrine and other factor-regulated calcium reabsorption	interaction, ultra	38	0.0366073	25/49	6.474e-13	486, 9365								rs11216567, rs191924, rs211252, rs2320760, rs2858977, rs2858978, rs3848093, rs385564, rs479991, rs4941701, rs4942922, rs4942924, rs516306, rs540109, rs542624, rs553791, rs554634, rs562020, rs566514, rs571118, rs576404, rs648202, rs650439, rs659117, rs677332, rs684492, rs684868, rs7988462, rs9315193, rs9315202, rs9526838, rs9527023, rs9527024, rs9535698, rs9536313, rs9536368, rs9563081, rs9568680
Hematopoietic cell lineage	pathway	1026	0.0374075	69/88	1.169e-51	290, 909, 910, 912, 913, 914, 915, 916, 920, 921, 925, 926, 928, 929, 931, 933, 945, 947, 948, 951, 952, 960, 966, 1378, 1380, 1435, 1436, 1437, 1440, 1441, 1604, 1791, 2056, 2057, 2208, 2322, 2811, 2814, 2993, 3126, 3552, 3553, 3554, 3559, 3562, 3565, 3566, 3567, 3568, 3569, 3570, 3574, 3575, 3655, 3672, 3673, 3674, 3675, 3676, 3678, 3684, 3690, 3815, 4254, 4311, 7037, 7066, 7173, 7850								rs10016073, rs10019008, rs1002655, rs1002656, rs10029931, rs10044838, rs10053847, rs10057067, rs1005834, rs10093522, rs1009897, rs1010101, rs10106730, rs1015260, rs10204515, rs10205700, rs10217110, rs1025039, rs1025192, rs10255691, rs10263896, rs1035732, rs1038034, rs10412123, rs10419722, rs10429953, rs10434440, rs1047481, rs10488809, rs10488968, rs10491434, rs10494190, rs10499563, rs10504684, rs…
Wnt signaling pathway	pathway	3866	0.0374075	134/151	1.92e-114	324, 595, 815, 816, 817, 818, 894, 896, 1387, 1452, 1454, 1457, 1459, 1487, 1488, 1499, 1857, 2033, 2239, 2535, 2932, 3725, 4040, 4041, 4087, 4088, 4089, 4316, 4609, 4772, 4773, 4775, 4776, 5330, 5331, 5332, 5467, 5515, 5518, 5519, 5525, 5527, 5528, 5529, 5530, 5532, 5533, 5534, 5567, 5568, 5578, 5579, 5582, 5599, 5601, 5602, 5613, 5663, 5879, 5880, 6093, 6422, 6423, 6424, 6425, 6477, 6500, 6885,…								rs10000775, rs10001480, rs10005635, rs10005711, rs10009286, rs10011961, rs10012684, rs10014763, rs10015062, rs10015110, rs1001950, rs10023113, rs10024003, rs10026060, rs10028834, rs10028852, rs10029339, rs10030362, rs10031040, rs10031057, rs10031159, rs10033283, rs10040841, rs1004765, rs10049173, rs10050608, rs10055448, rs10061285, rs1006355, rs10064428, rs10066581, rs10067312, rs10068589, rs1006…
Acute myeloid leukemia	interaction, high	514	0.0384077	49/58	5.123e-40	207, 208, 572, 673, 861, 1147, 2322, 2475, 2885, 3551, 3815, 4790, 5292, 5295, 5594, 5604, 6198, 6199, 6774, 6776, 6777, 8503, 10000, 23533								rs10037187, rs10040640, rs10043473, rs10056163, rs10064315, rs1006639, rs10070943, rs10071585, rs10075612, rs10078240, rs1010447, rs1015602, rs10244133, rs1026916, rs10281173, rs1033335, rs10434440, rs10460712, rs10487888, rs10515052, rs10515058, rs10515062, rs10515070, rs10515086, rs1053005, rs1057079, rs1064261, rs1076094, rs10803158, rs10803171, rs10805422, rs10805425, rs10854374, rs10927039, …
Cell cycle	characteristic	175	0.0386077	61/128	2.112e-27	990, 4998, 4999, 5000, 5001, 5885, 7029, 7272, 7465, 8317, 8318, 8555, 8556, 10274, 10735, 23595, 494551								rs10111415, rs10157619, rs10167387, rs10205561, rs10231843, rs10246098, rs10257653, rs10493923, rs10500708, rs10513016, rs1063302, rs10743113, rs10770040, rs10770047, rs10783130, rs10840269, rs10875290, rs10943681, rs11042427, rs11164774, rs11164953, rs11166437, rs11166438, rs11569193, rs11569214, rs11569218, rs11705932, rs11760007, rs1192404, rs1192419, rs11993769, rs12053401, rs12056137, rs1205…
Pentose phosphate pathway	pathway	413	0.040008	23/28	7.452e-19	229, 2203, 2821, 5211, 5213, 5214, 5226, 5236, 5631, 5634, 6888, 7086, 8277, 8789, 9563, 22934, 25796, 51071, 55276, 64080, 84076, 221823, 729020								rs10028206, rs10047370, rs1006239, rs1009128, rs1009941, rs10281630, rs1041598, rs10466265, rs10493350, rs1049392, rs10517423, rs1053000, rs10748839, rs10751831, rs10751864, rs10751876, rs10751884, rs10751898, rs10761346, rs10761348, rs10772880, rs10789146, rs10794818, rs10794864, rs10794865, rs10794870, rs10794949, rs10794964, rs10794986, rs10794988, rs10795000, rs10795002, rs10821367, rs1084626…
Fanconi anemia pathway	characteristic	209	0.0422084	21/54	0.001785	2175, 2176, 2177, 2178, 2187, 2188, 7398, 9894, 11201, 22909, 29089, 51426, 51455, 55215, 57599, 57697, 79728, 80010, 83990, 84126, 116028								rs10163148, rs10163438, rs10172752, rs1018119, rs10186223, rs1027710, rs10438771, rs10451012, rs10465178, rs10500928, rs10510698, rs10515211, rs10821455, rs10868107, rs10868108, rs10889325, rs10993531, rs11026626, rs11026630, rs11026663, rs11026697, rs11074989, rs11140385, rs11140449, rs11140486, rs11140489, rs1115113, rs11640295, rs11750595, rs11860060, rs12025429, rs12034108, rs120963, rs121262…
N-Glycan biosynthesis	pathway	1120	0.0428086	41/49	2.526e-33	1603, 1650, 1798, 2530, 2683, 3703, 4121, 4122, 4124, 4245, 4248, 4249, 6184, 6185, 6480, 7841, 7991, 8703, 8813, 8818, 10905, 11253, 11320, 25834, 29880, 29929, 54344, 56052, 57134, 79053, 79087, 79796, 84620, 84920, 85365, 91869, 144245, 146664, 199857, 201595, 440138								rs10039159, rs10048187, rs1008661, rs10091071, rs10094191, rs10094375, rs10098376, rs10103753, rs10106008, rs10109908, rs10113903, rs10130648, rs10131727, rs10132765, rs10134278, rs10134793, rs10141478, rs10143206, rs10149325, rs10149541, rs1015976, rs1017654, rs1017659, rs10196004, rs10196481, rs10197842, rs10202530, rs10221759, rs10222558, rs1025934, rs1028961, rs1029861, rs1029864, rs1038143, …
Collecting duct acid secretion	characteristic	6	0.0442088	3/27	0.5272	1188, 6521, 10723								rs11652651, rs2007471, rs2334955, rs4975552, rs6696416, rs7379059
Aminoacyl-tRNA biosynthesis	pathway	398	0.045209	35/63	4.35e-19	16, 833, 1615, 2058, 2617, 3035, 3376, 3735, 4677, 5917, 6301, 6897, 7453, 8565, 10056, 10352, 10667, 23395, 25973, 51067, 51091, 51520, 55157, 55699, 57038, 57176, 57505, 79587, 79731, 80222, 92935, 118672, 123263, 123283, 124454								rs1005417, rs10054670, rs10071837, rs1008198, rs1009606, rs10120980, rs10438233, rs10438234, rs10444899, rs10458088, rs10484314, rs10497807, rs10516047, rs10751297, rs10761149, rs10761150, rs10779396, rs10793324, rs1080, rs10844337, rs10899551, rs10902853, rs10914621, rs10923718, rs10923726, rs10923748, rs10923755, rs10923799, rs10932966, rs10939041, rs10992260, rs11052214, rs11102957, rs11130066…
Long-term potentiation	characteristic interaction, ultra	5	0.0454091	51/70	1.057e-35	5502								rs11170980, rs1144998, rs1145000, rs1157484, rs7297136
Chagas disease (American trypanosomiasis)	interaction, high	1042	0.0474095	79/104	4.272e-57	207, 208, 355, 624, 718, 915, 916, 919, 1147, 1432, 1636, 3456, 3459, 3460, 3551, 3553, 3558, 3569, 3576, 3586, 3592, 3593, 3654, 4615, 4790, 4792, 5054, 5295, 5330, 5331, 5332, 5518, 5519, 5594, 5599, 5601, 5602, 5603, 6347, 6348, 6352, 6416, 7046, 7048, 7097, 7099, 8503, 8772, 10000, 23236, 23533, 51135, 148022								rs10001480, rs10024003, rs10026060, rs10029339, rs1003199, rs10033283, rs10037187, rs10040640, rs10043473, rs10056163, rs10064315, rs10070943, rs10071585, rs10075612, rs10078240, rs10132268, rs10132489, rs10140368, rs10142830, rs10144552, rs10147603, rs10149714, rs1019855, rs1022596, rs10255691, rs10263896, rs1028593, rs1036097, rs1036307, rs1040496, rs10413435, rs10417820, rs10423794, rs10424348…
SNARE interactions in vesicular transport	characteristic	221	0.0482096	19/36	1.777e-10	662, 6843, 8674, 8675, 8676, 8773, 9342, 9482, 9570, 10228, 10282, 10490, 10652, 10791, 51272, 55014, 116841, 143187								rs10120103, rs10121880, rs10123261, rs10215958, rs10217692, rs1022907, rs10248807, rs10257353, rs10264801, rs10487252, rs10494536, rs10509963, rs10509964, rs10518766, rs10521157, rs1052586, rs10797664, rs10798603, rs10819702, rs10819703, rs10885348, rs10885352, rs10885369, rs10885371, rs10885372, rs10885378, rs10910849, rs10913529, rs10916203, rs10953106, rs10953107, rs10953111, rs11064227, rs110…
Amoebiasis	interaction, high	1003	0.04981	74/106	4.106e-49	81, 87, 88, 89, 912, 929, 1511, 1992, 2335, 2919, 3553, 3554, 3569, 3576, 3586, 3592, 3593, 3684, 4790, 5055, 5269, 5272, 5273, 5275, 5295, 5330, 5331, 5332, 5567, 5568, 5613, 6317, 6318, 7097, 7099, 7850, 8503, 23236, 23533								rs1003199, rs10037187, rs10040640, rs10043473, rs10056163, rs10064315, rs10070943, rs10071585, rs10075612, rs10078240, rs1009145, rs10141794, rs1015416, rs10163726, rs1016379, rs10172425, rs10199059, rs10201850, rs10202483, rs10209954, rs10218421, rs1022596, rs10255691, rs10263896, rs1037215, rs1040496, rs10432530, rs10485720, rs10485723, rs10485727, rs10485728, rs10493750, rs10498037, rs10498039…
