# Supplementary material for: Integrative Pathway-Based Approach for Genome-Wide Association Studies: Identification of New Pathways for Rheumatoid Arthritis and Type 1 Diabetes
Source: PLoS One. 2013 Oct 25;8(10):e78577. doi: 10.1371/journal.pone.0078577 (PMC3808349; doi:10.1371/journal.pone.0078577)
Supplement: Table S7 — Comparison to GenGen. This table shows a comparison of the results of MIP and GenGen. The pathways which kept significant during our sensitivity analysis are highlighted in yellow. Abbreviations: CD = Crohn's disease, RA = rheumatoid arthritis, T1D = type 1 diabetes. (XLSX) [file pone.0078577.s008.xlsx]

## Sheet: CD
GenGen results								GWAS Pathway Identifier results
Geneset	No of genes	ES	NES	NominalP	FDR	FWER		Pathway id	Description	Method	No of SNPs	p-value
hsa05221	49	0.459	6.3	0	0	0		path:hsa05221_high	Acute myeloid leukemia	interaction, high	510	<=1.0E-06
hsa04520	72	0.467	5.425	0	0	0		path:hsa04520_low	Adherens junction	pathway	2991	<=1.0E-06
hsa04920	60	0.449	6.707	0	0	0		path:hsa04920_low	Adipocytokine signaling pathway	pathway	1254	<=1.0E-06
hsa05330	33	0.58	6.17	0	0	0		path:hsa05330_high	Allograft rejection	interaction, high	430	<=1.0E-06
hsa05010	21	0.489	2.976	0	0.002	0.153		path:hsa05010_low	Alzheimer's disease	pathway	2511	<=1.0E-06
hsa04612	60	0.39	2.653	0	0.005	0.324		path:hsa04612_ultra	Antigen processing and presentation	interaction, ultra	351	<=1.0E-06
hsa04210	71	0.289	2.511	0	0.007	0.407		path:hsa04210_medium	Apoptosis	interaction, medium	972	<=1.0E-06
hsa05310	26	0.547	3.29	0	0.001	0.073		path:hsa05310_high	Asthma	interaction, high	191	<=1.0E-06
hsa05320	47	0.559	4.32	0	0	0.003		path:hsa05320_medium	Autoimmune thyroid disease	interaction, medium	504	<=1.0E-06
hsa04360	109	0.51	6.574	0	0	0		path:hsa04360_medium	Axon guidance	interaction, medium	4155	<=1.0E-06
hsa04662	50	0.452	5.39	0	0	0		path:hsa04662_high	B cell receptor signaling pathway	interaction, high	762	<=1.0E-06
hsa04020	149	0.465	7.793	0	0	0		path:hsa04020_low	Calcium signaling pathway	pathway	6155	<=1.0E-06
hsa04514	111	0.494	8.173	0	0	0		path:hsa04514_ultra	Cell adhesion molecules (CAMs)	interaction, ultra	2522	<=1.0E-06
hsa04110	81	0.356	5.604	0	0	0		path:hsa04110_low	Cell cycle	pathway	1334	<=1.0E-06
hsa05220	66	0.431	7.499	0	0	0		path:hsa05220_high	Chronic myeloid leukemia	interaction, high	777	<=1.0E-06
hsa04512	78	0.497	6.438	0	0	0		path:hsa04512_low	ECM-receptor interaction	pathway	2148	<=1.0E-06
hsa04012	77	0.479	8.128	0	0	0		path:hsa04012_high	ErbB signaling pathway	interaction, high	1809	<=1.0E-06
hsa04664	66	0.516	9.982	0	0	0		path:hsa04664_high	Fc epsilon RI signaling pathway	interaction, high	1193	<=1.0E-06
hsa04510	171	0.449	8.967	0	0	0		path:hsa04510_high	Focal adhesion	interaction, high	2433	<=1.0E-06
hsa05214	55	0.467	6.568	0	0	0		path:hsa05214_high	Glioma	interaction, high	809	<=1.0E-06
hsa00564	53	0.407	5.986	0	0	0		path:hsa00564_low	Glycerophospholipid metabolism	pathway	1887	<=1.0E-06
hsa04912	82	0.478	8.081	0	0	0		path:hsa04912_low	GnRH signaling pathway	pathway	2654	<=1.0E-06
hsa05332	32	0.504	4.485	0	0	0.003		path:hsa05332_medium	Graft-versus-host disease	interaction, medium	536	<=1.0E-06
hsa04340	50	0.492	5.858	0	0	0		path:hsa04340_medium	Hedgehog signaling pathway	interaction, medium	1358	<=1.0E-06
hsa04640	71	0.401	5.817	0	0	0		path:hsa04640_low	Hematopoietic cell lineage	pathway	1057	<=1.0E-06
hsa04910	107	0.394	8.331	0	0	0		path:hsa04910_low	Insulin signaling pathway	pathway	2066	<=1.0E-06
hsa04630	136	0.459	10.703	0	0	0		path:hsa04630_high	Jak-STAT signaling pathway	interaction, high	1540	<=1.0E-06
hsa04670	93	0.41	6.653	0	0	0		path:hsa04670_low	Leukocyte transendothelial migration	pathway	2870	<=1.0E-06
hsa04650	104	0.424	8.772	0	0	0		path:hsa04650_high	Natural killer cell mediated cytotoxicity	interaction, high	1151	<=1.0E-06
hsa05223	48	0.517	6.95	0	0	0		path:hsa05223_low	Non-small cell lung cancer	pathway	1315	<=1.0E-06
hsa05212	65	0.383	5.912	0	0	0		path:hsa05212_low	Pancreatic cancer	pathway	1284	<=1.0E-06
hsa04070	65	0.462	5.957	0	0	0		path:hsa04070_low	Phosphatidylinositol signaling system	pathway	2187	<=1.0E-06
hsa05340	28	0.42	2.127	0	0.014	0.701		path:hsa05340_ultra	Primary immunodeficiency	interaction, ultra	176	<=1.0E-06
hsa04810	170	0.429	10.574	0	0	0		path:hsa04810_high	Regulation of actin cytoskeleton	interaction, high	2796	<=1.0E-06
hsa05211	62	0.393	4.994	0	0	0		path:hsa05211_medium	Renal cell carcinoma	interaction, medium	961	<=1.0E-06
hsa05222	80	0.431	6.652	0	0	0		path:hsa05222_medium	Small cell lung cancer	interaction, medium	816	<=1.0E-06
hsa00600	30	0.545	5.241	0	0	0		path:hsa00600_medium	Sphingolipid metabolism	interaction, medium	544	<=1.0E-06
hsa05322	41	0.504	6.389	0	0	0		path:hsa05322_ultra	Systemic lupus erythematosus	interaction, ultra	309	<=1.0E-06
hsa04660	82	0.458	8.338	0	0	0		path:hsa04660_high	T cell receptor signaling pathway	interaction, high	1571	<=1.0E-06
hsa04530	109	0.428	6.961	0	0	0		path:hsa04530_medium	Tight junction	interaction, medium	2534	<=1.0E-06
hsa04940	37	0.515	5.554	0	0	0		path:hsa04940_ultra	Type I diabetes mellitus	interaction, ultra	412	<=1.0E-06
hsa04120	110	0.321	6.276	0	0	0		path:hsa04120_low	Ubiquitin mediated proteolysis	pathway	2108	<=1.0E-06
hsa04370	60	0.328	4.005	0	0	0.005		path:hsa04370_medium	VEGF signaling pathway	interaction, medium	1143	<=1.0E-06
hsa04310	131	0.448	8.701	0	0	0		path:hsa04310_low	Wnt signaling pathway	pathway	3877	<=1.0E-06
								path:hsa05034_high	Alcoholism	interaction, high	1419	<=1.0E-06
								path:hsa05146_low	Amoebiasis	pathway	2465	<=1.0E-06
								path:hsa05031_low	Amphetamine addiction	pathway	2378	<=1.0E-06
								path:hsa05014_low	Amyotrophic lateral sclerosis (ALS)	pathway	1253	<=1.0E-06
								path:hsa05100_high	Bacterial invasion of epithelial cells	interaction, high	635	<=1.0E-06
								path:hsa04973_ultra	Carbohydrate digestion and absorption	interaction, ultra	355	<=1.0E-06
								path:hsa04062_high	Chemokine signaling pathway	interaction, high	2346	<=1.0E-06
								path:hsa04725_high	Cholinergic synapse	interaction, high	1718	<=1.0E-06
								path:hsa05030_low	Cocaine addiction	pathway	1546	<=1.0E-06
								path:hsa04060_high	Cytokine-cytokine receptor interaction	interaction, high	3237	<=1.0E-06
								path:hsa05414_low	Dilated cardiomyopathy	pathway	3143	<=1.0E-06
								path:hsa04728_medium	Dopaminergic synapse	interaction, medium	2919	<=1.0E-06
								path:hsa04144_low	Endocytosis	characteristic	1451	<=1.0E-06
								path:hsa05169_ultra	Epstein-Barr virus infection	interaction, ultra	697	<=1.0E-06
								path:hsa04666_high	Fc gamma R-mediated phagocytosis	interaction, high	1190	<=1.0E-06
								path:hsa04971_low	Gastric acid secretion	pathway	2271	<=1.0E-06
								path:hsa04724_high	Glutamatergic synapse	interaction, high	3495	<=1.0E-06
								path:hsa05168_ultra	Herpes simplex infection	interaction, ultra	958	<=1.0E-06
								path:hsa05166_ultra	HTLV-I infection	interaction, ultra	622	<=1.0E-06
								path:hsa05164_high	Influenza A	interaction, high	1193	<=1.0E-06
								path:hsa04672_ultra	Intestinal immune network for IgA production	interaction, ultra	372	<=1.0E-06
								path:hsa05140_ultra	Leishmaniasis	interaction, ultra	560	<=1.0E-06
								path:hsa04010_high	MAPK signaling pathway	interaction, high	4201	<=1.0E-06
								path:hsa05162_high	Measles	interaction, high	1397	<=1.0E-06
								path:hsa05032_low	Morphine addiction	pathway	3261	<=1.0E-06
								path:hsa04080_high	Neuroactive ligand-receptor interaction	characteristic interaction, high	2091	<=1.0E-06
								path:hsa04722_medium	Neurotrophin signaling pathway	interaction, medium	1987	<=1.0E-06
								path:hsa04064_low	NF-kappa B signaling pathway	pathway	1569	<=1.0E-06
								path:hsa05033_high	Nicotine addiction	interaction, high	1515	<=1.0E-06
								path:hsa04114_low	Oocyte meiosis	pathway	2008	<=1.0E-06
								path:hsa04380_low	Osteoclast differentiation	pathway	2551	<=1.0E-06
								path:hsa04972_low	Pancreatic secretion	pathway	2520	<=1.0E-06
								path:hsa05200_medium	Pathways in cancer	interaction, medium	5205	<=1.0E-06
								path:hsa04146_medium	Peroxisome	interaction, medium	459	<=1.0E-06
								path:hsa05133_ultra	Pertussis	interaction, ultra	193	<=1.0E-06
								path:hsa04914_low	Progesterone-mediated oocyte maturation	pathway	1647	<=1.0E-06
								path:hsa04141_low	Protein processing in endoplasmic reticulum	pathway	2714	<=1.0E-06
								path:hsa04723_low	Retrograde endocannabinoid signaling	pathway	3501	<=1.0E-06
								path:hsa05323_ultra	Rheumatoid arthritis	interaction, ultra	421	<=1.0E-06
								path:hsa04970_low	Salivary secretion	pathway	2999	<=1.0E-06
								path:hsa04726_low	Serotonergic synapse	pathway	3655	<=1.0E-06
								path:hsa05150_ultra	Staphylococcus aureus infection	interaction, ultra	242	<=1.0E-06
								path:hsa05145_ultra	Toxoplasmosis	characteristic interaction, ultra	3	<=1.0E-06
								path:hsa05202_medium	Transcriptional misregulation in cancer	interaction, medium	2345	<=1.0E-06
								path:hsa05152_low	Tuberculosis	pathway	1919	<=1.0E-06
								path:hsa05203_high	Tumor viruses and cancer	interaction, high	1277	<=1.0E-06
								path:hsa04270_low	Vascular smooth muscle contraction	pathway	3795	<=1.0E-06
								path:hsa05416_high	Viral myocarditis	interaction, high	493	<=1.0E-06
hsa03030	26	0.449	2.497	0	0.007	0.414		path:hsa03030_low	DNA replication	pathway	364	0.0002
hsa00052	22	0.549	3.744	0	0	0.018		path:hsa00052_low	Galactose metabolism	pathway	552	0.0002
hsa04540	78	0.456	5.876	0	0	0		path:hsa04540_low	Gap junction	pathway	2885	0.0002
hsa04720	59	0.525	6.168	0	0	0		path:hsa04720_low	Long-term potentiation	pathway	2601	0.0002
hsa04930	38	0.424	4.019	0	0	0.005		path:hsa04930_low	Type II diabetes mellitus	pathway	1179	0.0002
								path:hsa05412_low	Arrhythmogenic right ventricular cardiomyopathy (ARVC)	pathway	3760	0.0002
								path:hsa00524_low	Butirosin and neomycin biosynthesis	pathway	66	0.0002
								path:hsa04727_high	GABAergic synapse	interaction, high	1390	0.0002
								path:hsa05410_low	Hypertrophic cardiomyopathy (HCM)	pathway	2699	0.0002
								path:hsa05020_low	Prion diseases	pathway	1156	0.0002
								path:hsa04974_low	Protein digestion and absorption	pathway	1532	0.0002
								path:hsa00140_ultra	Steroid hormone biosynthesis	interaction, ultra	64	0.0002
hsa05213	47	0.525	6.826	0	0	0		path:hsa05213_medium	Endometrial cancer	interaction, medium	533	0.0004
hsa00565	27	0.469	3.648	0	0	0.023		path:hsa00565_low	Ether lipid metabolism	pathway	826	0.0004
hsa00120	30	0.424	2.021	0	0.017	0.786		path:hsa00120_medium	Primary bile acid biosynthesis	interaction, medium	210	0.0004
hsa05215	77	0.435	7.331	0	0	0		path:hsa05215_low	Prostate cancer	pathway	1696	0.0004
hsa05131	38	0.453	4.379	0	0	0.003		path:hsa05131_low	Shigellosis	pathway	944	0.0004
								path:hsa04260_low	Cardiac muscle contraction	pathway	1632	0.0004
								path:hsa05142_low	Chagas disease (American trypanosomiasis)	pathway	1998	0.0004
								path:hsa00532_ultra	Glycosaminoglycan biosynthesis	interaction, ultra	625	0.0004
								path:hsa04145_low	Phagosome	pathway	1996	0.0004
hsa00562	41	0.423	4.189	0	0	0.003		path:hsa00562_low	Inositol phosphate metabolism	pathway	1298	0.0006
hsa05218	61	0.453	5.383	0	0	0		path:hsa05218_low	Melanoma	pathway	1852	0.0006
								path:hsa04320_low	Dorso-ventral axis formation	pathway	623	0.0006
								path:hsa04621_low	NOD-like receptor signaling pathway	pathway	871	0.0006
hsa00561	44	0.479	5.754	0	0	0		path:hsa00561_low	Glycerolipid metabolism	pathway	1429	0.0008
								path:hsa04961_low	Endocrine and other factor-regulated calcium reabsorption	pathway	1446	0.0008
								path:hsa05144_ultra	Malaria	interaction, ultra	344	0.0008
hsa04610	61	0.441	4.385	0	0	0.003		path:hsa04610_low	Complement and coagulation cascades	pathway	761	0.0010002
hsa05130	38	0.453	4.379	0	0	0.003		path:hsa05130_low	Pathogenic Escherichia coli infection	pathway	711	0.0010002
								path:hsa04976_low	Bile secretion	pathway	1663	0.0010002
								path:hsa05134_ultra	Legionellosis	interaction, ultra	150	0.0010002
								path:hsa04614_low	Renin-angiotensin system	pathway	278	0.0010002
hsa00230	121	0.356	6.9	0	0	0		path:hsa00230_low	Purine metabolism	pathway	3316	0.00120024
hsa04350	77	0.477	7.488	0	0	0		path:hsa04350_low	TGF-beta signaling pathway	pathway	2015	0.00120024
								path:hsa00520_ultra	Amino sugar and nucleotide sugar metabolism	characteristic interaction, ultra	14	0.00120024
hsa04150	37	0.418	3.468	0	0.001	0.039		path:hsa04150_high	mTOR signaling pathway	interaction, high	706	0.00140028
hsa00510	36	0.488	5.006	0	0	0		path:hsa00510_low	N-Glycan biosynthesis	pathway	1124	0.00160032
hsa04620	86	0.331	3.02	0	0.002	0.137		path:hsa04620_low	Toll-like receptor signaling pathway	pathway	1300	0.00160032
								path:hsa05016_ultra	Huntington's disease	interaction, ultra	412	0.00160032
hsa03430	21	0.485	2.338	0	0.01	0.539		path:hsa03430_low	Mismatch repair	pathway	317	0.00180036
hsa00500	60	0.38	5.682	0	0	0		path:hsa00500_high	Starch and sucrose metabolism	interaction, high	484	0.0020004
								path:hsa04978_low	Mineral absorption	pathway	756	0.0020004
hsa00970	33	0.338	2.183	0	0.013	0.652		path:hsa00970_low	Aminoacyl-tRNA biosynthesis	characteristic	339	0.00220044
hsa00982	53	0.275	1.518	0.001	0.045	0.989		path:hsa00982_ultra	Drug metabolism	characteristic interaction, ultra	53	0.00220044
hsa04950	20	0.327	0.452	0.3	0.33	1		path:hsa04960_high	Aldosterone-regulated sodium reabsorption	interaction, high	418	0.00220044
hsa04730	69	0.459	5.924	0	0	0		path:hsa04730_low	Long-term depression	pathway	2551	0.00260052
hsa00590	42	0.286	1.484	0.001	0.047	0.99		path:hsa00590_ultra	Arachidonic acid metabolism	interaction, ultra	104	0.00260052
hsa00051	24	0.412	2.597	0.003	0.005	0.354		path:hsa00051_low	Fructose and mannose metabolism	pathway	602	0.00320064
hsa04916	90	0.479	8.445	0	0	0		path:hsa04916_low	Melanogenesis	pathway	2549	0.00340068
hsa00650	32	0.33	1.915	0.005	0.021	0.834		path:hsa00650_low	Butanoate metabolism	characteristic	36	0.00360072
hsa00330	28	0.448	3.024	0	0.002	0.137		path:hsa00330_medium	Arginine and proline metabolism	interaction, medium	277	0.00420084
								path:hsa00534_low	Glycosaminoglycan biosynthesis	pathway	1231	0.005001
hsa04115	60	0.409	5.982	0	0	0		path:hsa04115_low	p53 signaling pathway	pathway	1236	0.00540108
hsa04130	25	0.383	2.148	0.002	0.014	0.683		path:hsa04130_low	SNARE interactions in vesicular transport	pathway	414	0.00560112
hsa05217	51	0.498	6.237	0	0	0		path:hsa05217_low	Basal cell carcinoma	pathway	1278	0.00580116
								path:hsa05160_low	Hepatitis C	pathway	1521	0.0060012
								path:hsa00630_ultra	Glyoxylate and dicarboxylate metabolism	interaction, ultra	121	0.00660132
hsa00512	26	0.471	1.957	0.028	0.019	0.819		path:hsa00512_low	Mucin type O-Glycan biosynthesis	pathway	1240	0.00680136
								path:hsa00770_high	Pantothenate and CoA biosynthesis	characteristic interaction, high	21	0.00820164
								path:hsa00130_high	Ubiquinone and other terpenoid-quinone biosynthesis	interaction, high	15	0.00860172
								path:hsa04142_ultra	Lysosome	interaction, ultra	466	0.00880176
hsa00240	65	0.308	2.616	0	0.005	0.345		path:hsa00240_high	Pyrimidine metabolism	interaction, high	404	0.00920184
								path:hsa00250_medium	Alanine, aspartate and glutamate metabolism	interaction, medium	212	0.00920184
								path:hsa00430_ultra	Taurine and hypotaurine metabolism	interaction, ultra	37	0.00960192
								path:hsa03013_low	RNA transport	pathway	1691	0.0108022
								path:hsa00533_low	Glycosaminoglycan biosynthesis	pathway	396	0.0110022
hsa03320	60	0.386	3.962	0	0	0.006		path:hsa03320_low	PPAR signaling pathway	pathway	875	0.0114023
								path:hsa03015_low	mRNA surveillance pathway	characteristic	379	0.0116023
hsa03410	24	0.338	1.704	0.003	0.032	0.934		path:hsa03410_medium	Base excision repair	interaction, medium	99	0.0124025
hsa04742	35	0.367	3.093	0.002	0.002	0.119		path:hsa04742_low	Taste transduction	pathway	1017	0.0130026
hsa03010	48	0.416	3.649	0	0	0.022		path:hsa03010_low	Ribosome	pathway	953	0.0132026
hsa02010	41	0.525	6.529	0	0	0		path:hsa02010_low	ABC transporters	pathway	732	0.0134027
								path:hsa00563_high	Glycosylphosphatidylinositol(GPI)-anchor biosynthesis	characteristic interaction, high	11	0.0134027
hsa00310	34	0.3	1.585	0.017	0.04	0.978		path:hsa00310_ultra	Lysine degradation	characteristic interaction, ultra	10	0.0146029
								path:hsa04975_low	Fat digestion and absorption	pathway	1019	0.015003
								path:hsa03460_low	Fanconi anemia pathway	pathway	494	0.015203
								path:hsa04710_low	Circadian rhythm	pathway	647	0.0162032
hsa00030	23	0.371	1.574	0.004	0.04	0.978		path:hsa00030_low	Pentose phosphate pathway	pathway	417	0.0170034
hsa03440	25	0.476	2.488	0	0.007	0.418		path:hsa03440_medium	Homologous recombination	interaction, medium	103	0.0172034
hsa00010	49	0.423	3.337	0	0.001	0.062		path:hsa00010_low	Glycolysis / Gluconeogenesis	pathway	786	0.0174035
hsa00190	77	0.279	2.1	0	0.015	0.717		path:hsa00190_low	Oxidative phosphorylation	characteristic	57	0.0184037
hsa00260	31	0.35	1.768	0.001	0.028	0.907		path:hsa00260_low	Glycine, serine and threonine metabolism	pathway	388	0.0184037
								path:hsa03450_low	Non-homologous end-joining	pathway	135	0.0196039
								path:hsa00920_ultra	Sulfur metabolism	interaction, ultra	109	0.020204
hsa00830	46	0.353	1.916	0	0.021	0.833		path:hsa00830_ultra	Retinol metabolism	characteristic interaction, ultra	15	0.0204041
								path:hsa00592_high	alpha-Linolenic acid metabolism	interaction, high	408	0.0206041
hsa04330	35	0.314	2.128	0.004	0.014	0.698		path:hsa04330_low	Notch signaling pathway	pathway	621	0.0220044
hsa00591	24	0.233	0.965	0.074	0.135	1		path:hsa00591_high	Linoleic acid metabolism	interaction, high	405	0.0224045
								path:hsa05143_low	African trypanosomiasis	pathway	782	0.0226045
								path:hsa03050_low	Proteasome	pathway	380	0.0256051
hsa00790	33	0.331	2.193	0	0.013	0.647		path:hsa00790_medium	Folate biosynthesis	interaction, medium	119	0.0266053
hsa00450	25	0.466	3.933	0	0	0.007		path:hsa00450_ultra	Selenocompound metabolism	interaction, ultra	29	0.0294059
hsa05210	78	0.453	6.585	0	0	0		path:hsa05210_low	Colorectal cancer	pathway	1573	0.0310062
								path:hsa00270_low	Cysteine and methionine metabolism	pathway	738	0.0314063
								path:hsa03060_medium	Protein export	characteristic interaction, medium	31	0.0326065
								path:hsa00730_low	Thiamine metabolism	pathway	150	0.0346069
								path:hsa04977_high	Vitamin digestion and absorption	interaction, high	263	0.0346069
								path:hsa05012_medium	Parkinson's disease	interaction, medium	942	0.0356071
								path:hsa00511_low	Other glycan degradation	pathway	95	0.0358072
hsa00380	48	0.395	4.124	0	0	0.003		path:hsa00380_medium	Tryptophan metabolism	interaction, medium	362	0.0376075
hsa03420	37	0.334	1.973	0	0.019	0.807		path:hsa03420_ultra	Nucleotide excision repair	interaction, ultra	96	0.0378076
								path:hsa00604_low	Glycosphingolipid biosynthesis	pathway	452	0.0382076
								path:hsa04622_low	RIG-I-like receptor signaling pathway	pathway	819	0.0382076
								path:hsa00100_low	Steroid biosynthesis	characteristic	16	0.045009
hsa00071	39	0.376	2.062	0	0.016	0.745
hsa00220	25	0.45	2.449	0	0.007	0.448
hsa00251	28	0.471	3.927	0	0	0.007
hsa00252	31	0.372	2.097	0	0.015	0.72
hsa00340	35	0.379	2.416	0	0.008	0.476
hsa00350	43	0.381	3.985	0	0	0.006
hsa00530	26	0.407	1.967	0	0.019	0.812
hsa00640	30	0.464	4.166	0	0	0.003
hsa00860	29	0.424	2.028	0	0.017	0.77
hsa00980	50	0.272	1.589	0	0.04	0.976
hsa01030	99	0.484	6.893	0	0	0
hsa01031	49	0.47	5.431	0	0	0
hsa01430	120	0.375	7.964	0	0	0
hsa01510	34	0.433	4.306	0	0	0.003
hsa04140	23	0.516	2.712	0	0.004	0.296
hsa05040	27	0.52	2.527	0	0.006	0.397
hsa05110	53	0.337	3.633	0	0	0.024
hsa05216	28	0.465	3.441	0	0.001	0.041
hsa05219	33	0.448	4.113	0	0	0.003
hsa00620	35	0.356	2.241	0.001	0.012	0.614
hsa00910	23	0.451	2.773	0.001	0.004	0.266
hsa01032	20	0.476	2.189	0.001	0.013	0.648
hsa00150	37	0.372	2.702	0.002	0.004	0.303
hsa03022	27	0.3	2.266	0.002	0.011	0.596
hsa00020	26	0.329	1.604	0.003	0.039	0.975
hsa00983	34	0.287	1.318	0.003	0.066	0.998
hsa00480	33	0.239	1.502	0.006	0.046	0.99
hsa05120	59	0.269	2.029	0.009	0.017	0.769
hsa00760	20	0.443	2.079	0.026	0.016	0.736
hsa00280	40	0.314	1.905	0.029	0.021	0.839
hsa00410	21	0.377	1.484	0.048	0.047	0.99

## Sheet: RA
GenGen results								GWAS Pathway Identifier results
Geneset	No of genes	ES	NES	NominalP	FDR	FWER		Pathway id	Description	Method	No of SNPs	p-value
hsa05330	33	0.917	11.6	0	0	0		path:hsa05330_high	Allograft rejection	interaction, high	432	<=1.0E-06
hsa04612	60	0.917	6.463	0	0	0		path:hsa04612_low	Antigen processing and presentation	pathway	566	<=1.0E-06
hsa05310	26	0.953	5.261	0	0	0		path:hsa05310_high	Asthma	interaction, high	194	<=1.0E-06
hsa05320	47	0.908	8.331	0	0	0		path:hsa05320_high	Autoimmune thyroid disease	interaction, high	480	<=1.0E-06
hsa04514	111	0.736	16.35	0	0	0		path:hsa04514_high	Cell adhesion molecules (CAMs)	interaction, high	3362	<=1.0E-06
hsa04610	61	0.508	5.443	0	0	0		path:hsa04610_high	Complement and coagulation cascades	interaction, high	504	<=1.0E-06
hsa04512	78	0.507	6.554	0	0	0		path:hsa04512_high	ECM-receptor interaction	interaction, high	629	<=1.0E-06
hsa04510	172	0.484	10.832	0	0	0		path:hsa04510_high	Focal adhesion	interaction, high	2445	<=1.0E-06
hsa05332	32	0.925	11.151	0	0	0		path:hsa05332_high	Graft-versus-host disease	interaction, high	448	<=1.0E-06
hsa04640	71	0.662	13.76	0	0	0		path:hsa04640_high	Hematopoietic cell lineage	interaction, high	912	<=1.0E-06
hsa04650	104	0.501	11.259	0	0	0		path:hsa04650_high	Natural killer cell mediated cytotoxicity	interaction, high	1154	<=1.0E-06
hsa04330	35	0.573	5.869	0	0	0		path:hsa04330_low	Notch signaling pathway	pathway	619	<=1.0E-06
hsa05322	41	0.886	13.72	0	0	0		path:hsa05322_high	Systemic lupus erythematosus	interaction, high	777	<=1.0E-06
hsa04530	109	0.423	7.043	0	0	0		path:hsa04530_medium	Tight junction	interaction, medium	2528	<=1.0E-06
hsa04620	86	0.359	3.515	0	0	0.031		path:hsa04620_high	Toll-like receptor signaling pathway	characteristic interaction, high	2	<=1.0E-06
hsa04940	37	0.895	13.475	0	0	0		path:hsa04940_high	Type I diabetes mellitus	interaction, high	601	<=1.0E-06
								path:hsa04320_low	Dorso-ventral axis formation	pathway	621	<=1.0E-06
								path:hsa04144_low	Endocytosis	pathway	4107	<=1.0E-06
								path:hsa05169_high	Epstein-Barr virus infection	interaction, high	1763	<=1.0E-06
								path:hsa05168_high	Herpes simplex infection	interaction, high	1325	<=1.0E-06
								path:hsa05166_high	HTLV-I infection	interaction, high	1487	<=1.0E-06
								path:hsa05164_high	Influenza A	interaction, high	1196	<=1.0E-06
								path:hsa04672_high	Intestinal immune network for IgA production	interaction, high	582	<=1.0E-06
								path:hsa05134_low	Legionellosis	pathway	461	<=1.0E-06
								path:hsa05140_high	Leishmaniasis	interaction, high	762	<=1.0E-06
								path:hsa04010_low	MAPK signaling pathway	pathway	6202	<=1.0E-06
								path:hsa05162_low	Measles	pathway	2022	<=1.0E-06
								path:hsa04145_high	Phagosome	interaction, high	823	<=1.0E-06
								path:hsa04974_ultra	Protein digestion and absorption	interaction, ultra	221	<=1.0E-06
								path:hsa04141_low	Protein processing in endoplasmic reticulum	pathway	2713	<=1.0E-06
								path:hsa05323_high	Rheumatoid arthritis	interaction, high	739	<=1.0E-06
								path:hsa03040_low	Spliceosome	pathway	769	<=1.0E-06
								path:hsa05150_high	Staphylococcus aureus infection	interaction, high	312	<=1.0E-06
								path:hsa05145_high	Toxoplasmosis	interaction, high	1558	<=1.0E-06
								path:hsa05152_high	Tuberculosis	interaction, high	1178	<=1.0E-06
								path:hsa05203_high	Tumor viruses and cancer	interaction, high	1277	<=1.0E-06
								path:hsa05416_high	Viral myocarditis	interaction, high	495	<=1.0E-06
hsa05040	27	0.371	1.651	0	0.037	0.954		path:hsa05100_high	Bacterial invasion of epithelial cells	interaction, high	640	0.0002
hsa05221	49	0.405	4.958	0	0	0		path:hsa05221_medium	Acute myeloid leukemia	interaction, medium	694	0.0004
hsa04630	136	0.4	8.403	0	0	0		path:hsa04630_low	Jak-STAT signaling pathway	pathway	2595	0.0004
								path:hsa00770_low	Pantothenate and CoA biosynthesis	characteristic	79	0.0004
								path:hsa05200_medium	Pathways in cancer	interaction, medium	5228	0.0004
hsa00650	32	0.414	2.951	0	0.003	0.167		path:hsa00650_low	Butanoate metabolism	characteristic	34	0.0006
								path:hsa04725_low	Cholinergic synapse	pathway	3450	0.0006
								path:hsa03013_medium	RNA transport	characteristic interaction, medium	222	0.0006
hsa04910	107	0.381	8.243	0	0	0		path:hsa04910_low	Insulin signaling pathway	pathway	2064	0.0008
hsa05222	80	0.432	6.583	0	0	0		path:hsa05222_high	Small cell lung cancer	interaction, high	529	0.0010002
								path:hsa04060_medium	Cytokine-cytokine receptor interaction	interaction, medium	3739	0.00120024
hsa04210	71	0.378	4.341	0	0	0		path:hsa04210_medium	Apoptosis	interaction, medium	976	0.0014
hsa05214	55	0.422	5.574	0	0	0		path:hsa05214_medium	Glioma	interaction, medium	1118	0.00140028
								path:hsa04973_medium	Carbohydrate digestion and absorption	interaction, medium	658	0.00180036
								path:hsa04970_low	Salivary secretion	pathway	2990	0.00180036
hsa04020	150	0.479	8.465	0	0	0		path:hsa04020_low	Calcium signaling pathway	pathway	6157	0.00240048
								path:hsa04146_low	Peroxisome	pathway	1178	0.00260052
								path:hsa05202_low	Transcriptional misregulation in cancer	pathway	3720	0.00260052
hsa05215	77	0.416	7.137	0	0	0		path:hsa05215_low	Prostate cancer	pathway	1696	0.00280056
								path:hsa04380_low	Osteoclast differentiation	pathway	2570	0.0030006
								path:hsa00140_low	Steroid hormone biosynthesis	characteristic	51	0.00320064
								path:hsa05160_high	Hepatitis C	interaction, high	986	0.00360072
								path:hsa05414_low	Dilated cardiomyopathy	pathway	3143	0.00380076
								path:hsa05410_low	Hypertrophic cardiomyopathy (HCM)	pathway	2701	0.00460092
hsa04660	82	0.429	7.72	0	0	0		path:hsa04660_medium	T cell receptor signaling pathway	interaction, medium	1991	0.00620124
hsa05220	66	0.348	5.244	0	0	0		path:hsa05220_ultra	Chronic myeloid leukemia	interaction, ultra	148	0.00660132
								path:hsa03018_ultra	RNA degradation	interaction, ultra	527	0.00760152
								path:hsa05146_low	Amoebiasis	pathway	2462	0.0078
hsa04360	110	0.524	7.083	0	0	0		path:hsa04360_medium	Axon guidance	characteristic interaction, medium	2880	0.00780156
								path:hsa04666_ultra	Fc gamma R-mediated phagocytosis	interaction, ultra	134	0.00780156
								path:hsa04971_low	Gastric acid secretion	pathway	2262	0.00780156
								path:hsa05014_low	Amyotrophic lateral sclerosis (ALS)	characteristic	90	0.00840168
hsa03440	25	0.422	2.188	0	0.014	0.636		path:hsa03440_medium	Homologous recombination	interaction, medium	103	0.00880176
								path:hsa04080_ultra	Neuroactive ligand-receptor interaction	interaction, ultra	1138	0.00920184
hsa04670	94	0.48	8.739	0	0	0		path:hsa04670_high	Leukocyte transendothelial migration	characteristic interaction, high	32	0.00980196
hsa04930	38	0.401	3.623	0.001	0	0.027		path:hsa04930_low	Type II diabetes mellitus	pathway	1178	0.010002
hsa04520	72	0.45	4.777	0	0	0		path:hsa04520_medium	Adherens junction	interaction, medium	1861	0.0108022
hsa04110	81	0.382	5.607	0	0	0		path:hsa04110_low	Cell cycle	characteristic	175	0.0110022
hsa05223	48	0.426	4.98	0	0	0		path:hsa05223_high	Non-small cell lung cancer	interaction, high	493	0.0110022
hsa04150	37	0.323	2.024	0.002	0.019	0.761		path:hsa04150_low	mTOR signaling pathway	pathway	1175	0.0110022
								path:hsa00785_low	Lipoic acid metabolism	pathway	19	0.012
								path:hsa04722_low	Neurotrophin signaling pathway	pathway	2102	0.0126025
								path:hsa05142_high	Chagas disease (American trypanosomiasis)	interaction, high	1045	0.013
								path:hsa05412_low	Arrhythmogenic right ventricular cardiomyopathy (ARVC)	pathway	3757	0.0132
								path:hsa04726_low	Serotonergic synapse	characteristic	117	0.0138028
								path:hsa04260_low	Cardiac muscle contraction	pathway	1629	0.0146
hsa04012	77	0.452	7.497	0	0	0		path:hsa04012_high	ErbB signaling pathway	interaction, high	1813	0.015203
								path:hsa00061_low	Fatty acid biosynthesis	pathway	109	0.015203
								path:hsa05031_low	Amphetamine addiction	pathway	2375	0.0176035
								path:hsa04972_low	Pancreatic secretion	pathway	2511	0.0176035
								path:hsa04614_ultra	Renin-angiotensin system	interaction, ultra	74	0.0194039
								path:hsa04270_low	Vascular smooth muscle contraction	pathway	3796	0.0196039
								path:hsa04744_low	Phototransduction	characteristic	23	0.0198
hsa05218	61	0.446	5.353	0	0	0		path:hsa05218_high	Melanoma	interaction, high	1511	0.021
hsa00500	60	0.479	8.928	0	0	0		path:hsa00500_high	Starch and sucrose metabolism	interaction, high	481	0.0214
hsa00970	33	0.417	2.575	0	0.006	0.347		path:hsa00970_low	Aminoacyl-tRNA biosynthesis	characteristic	343	0.0228
hsa04916	90	0.485	8.114	0	0	0		path:hsa04916_ultra	Melanogenesis	characteristic interaction, ultra	64	0.0228046
hsa00980	50	0.267	1.533	0.001	0.046	0.979		path:hsa00980_medium	Metabolism of xenobiotics by cytochrome P450	characteristic interaction, medium	6	0.0276055
hsa04912	82	0.47	7.499	0	0	0		path:hsa04912_low	GnRH signaling pathway	pathway	2650	0.0282056
hsa05212	65	0.347	4.921	0	0	0		path:hsa05212_high	Pancreatic cancer	interaction, high	814	0.029
hsa05130	39	0.412	3.841	0	0	0.011		path:hsa05130_low	Pathogenic Escherichia coli infection	pathway	712	0.0306
hsa00830	46	0.284	1.385	0.003	0.061	0.994		path:hsa00830_ultra	Retinol metabolism	interaction, ultra	43	0.0308062
								path:hsa03015_low	mRNA surveillance pathway	pathway	1250	0.0314
hsa03410	24	0.258	1.202	0.034	0.084	1		path:hsa03410_ultra	Base excision repair	interaction, ultra	39	0.0322064
hsa04662	50	0.389	4.095	0	0	0.003		path:hsa04662_medium	B cell receptor signaling pathway	interaction, medium	1061	0.0326065
hsa03022	27	0.457	3.297	0	0.001	0.062		path:hsa03022_low	Basal transcription factors	pathway	299	0.0330066
								path:hsa04062_high	Chemokine signaling pathway	interaction, high	2366	0.0330066
								path:hsa00270_ultra	Cysteine and methionine metabolism	interaction, ultra	399	0.0336067
								path:hsa03460_low	Fanconi anemia pathway	characteristic	208	0.0338068
hsa04115	60	0.384	5.203	0	0	0		path:hsa04115_low	p53 signaling pathway	pathway	1235	0.034807
								path:hsa05143_low	African trypanosomiasis	pathway	782	0.0404081
hsa05213	47	0.409	3.991	0	0	0.003		path:hsa05213_high	Endometrial cancer	interaction, high	435	0.0406081
								path:hsa04961_low	Endocrine and other factor-regulated calcium reabsorption	pathway	1442	0.0410082
hsa05131	39	0.412	3.841	0	0	0.011		path:hsa05131_ultra	Shigellosis	interaction, ultra	165	0.0436087
hsa00052	22	0.414	2.222	0	0.013	0.604		path:hsa00052_medium	Galactose metabolism	interaction, medium	199	0.0458092
hsa04920	60	0.425	5.802	0	0	0		path:hsa04920_low	Adipocytokine signaling pathway	pathway	1258	0.0462092
								path:hsa04978_low	Mineral absorption	pathway	753	0.0476095
hsa05217	51	0.433	4.603	0	0	0		path:hsa05217_medium	Basal cell carcinoma	interaction, medium	746	0.0478096
								path:hsa04728_low	Dopaminergic synapse	pathway	3827	0.0486097
hsa05010	21	0.411	1.96	0.006	0.021	0.815		path:hsa05010_low	Alzheimer's disease	pathway	2524	0.0492098
hsa03010	48	0.388	3.098	0	0.002	0.123		path:hsa03010_medium	Ribosome	characteristic interaction, medium	33	0.0494099
hsa00020	26	0.386	2.178	0	0.014	0.642
hsa00051	24	0.511	4.31	0	0	0
hsa00150	37	0.442	3.905	0	0	0.008
hsa00190	77	0.273	1.975	0	0.021	0.8
hsa00230	121	0.383	7.978	0	0	0
hsa00240	65	0.299	2.73	0	0.004	0.27
hsa00251	28	0.402	2.736	0	0.004	0.27
hsa00310	34	0.476	3.926	0	0	0.006
hsa00340	35	0.359	2.073	0	0.017	0.729
hsa00350	43	0.399	4.137	0	0	0.002
hsa00450	25	0.462	3.255	0	0.001	0.075
hsa00561	44	0.456	5.062	0	0	0
hsa00562	42	0.415	4.363	0	0	0
hsa00564	53	0.424	6.253	0	0	0
hsa00565	27	0.399	2.635	0	0.005	0.316
hsa00590	42	0.316	1.708	0	0.033	0.941
hsa00620	35	0.387	2.687	0	0.005	0.293
hsa00790	33	0.421	2.695	0	0.005	0.286
hsa01030	99	0.441	5.175	0	0	0
hsa01031	49	0.344	3.194	0	0.001	0.092
hsa01430	120	0.455	10.448	0	0	0
hsa01510	34	0.448	4.644	0	0	0
hsa02010	41	0.432	4.921	0	0	0
hsa03320	60	0.356	3.52	0	0	0.03
hsa03420	37	0.395	2.465	0	0.007	0.428
hsa04070	66	0.44	5.445	0	0	0
hsa04120	110	0.365	8.321	0	0	0
hsa04310	132	0.434	8.1	0	0	0
hsa04350	78	0.388	5.114	0	0	0
hsa04370	60	0.312	3.861	0	0	0.011
hsa04540	78	0.507	7.224	0	0	0
hsa04664	66	0.351	5.036	0	0	0
hsa04720	59	0.505	5.792	0	0	0
hsa04730	69	0.412	4.508	0	0	0
hsa04742	35	0.506	6.04	0	0	0
hsa04810	171	0.371	8.033	0	0	0
hsa04950	20	0.518	3.551	0	0	0.029
hsa05110	53	0.367	4.783	0	0	0
hsa05210	78	0.38	4.337	0	0	0
hsa05211	62	0.425	5.911	0	0	0
hsa05216	28	0.469	3.44	0	0.001	0.039
hsa05219	33	0.389	3.068	0	0.002	0.131
hsa05340	28	0.509	2.848	0	0.003	0.211
hsa00010	49	0.306	1.967	0.001	0.021	0.81
hsa00071	39	0.331	1.681	0.001	0.035	0.948
hsa00120	30	0.346	1.524	0.001	0.046	0.98
hsa00252	31	0.349	1.858	0.001	0.026	0.876
hsa00260	31	0.36	1.776	0.001	0.03	0.918
hsa03030	26	0.334	1.811	0.001	0.029	0.901
hsa03430	21	0.385	1.731	0.001	0.033	0.934
hsa04340	50	0.399	3.709	0.001	0	0.022
hsa00510	36	0.39	3.279	0.002	0.001	0.067
hsa01032	20	0.418	1.783	0.002	0.03	0.915
hsa00480	33	0.291	1.661	0.003	0.036	0.954
hsa00760	20	0.503	2.98	0.003	0.002	0.16
hsa00910	23	0.406	2.368	0.003	0.009	0.483
hsa00982	53	0.25	1.331	0.003	0.068	0.998
hsa00983	34	0.339	1.712	0.003	0.034	0.939
hsa04130	25	0.387	2.185	0.003	0.014	0.638
hsa05120	59	0.288	2.618	0.003	0.005	0.325
hsa00380	48	0.344	2.88	0.005	0.003	0.193
hsa00600	30	0.322	1.899	0.01	0.024	0.85
hsa00030	23	0.343	1.315	0.013	0.069	0.999
hsa00530	26	0.33	1.276	0.013	0.074	0.999
hsa00330	28	0.319	1.487	0.017	0.05	0.986
hsa04140	23	0.305	1.568	0.017	0.044	0.973
hsa00220	25	0.328	1.232	0.023	0.08	0.999
hsa00860	29	0.28	1.058	0.027	0.111	1
hsa00640	30	0.339	1.719	0.034	0.033	0.936
hsa00280	40	0.303	1.818	0.043	0.028	0.897
hsa00512	26	0.437	1.225	0.116	0.08	0.999
hsa00410	21	0.348	0.979	0.118	0.129	1
hsa00591	24	-0.239	-1.705	0.969	0.957	1

## Sheet: T1D
GenGen results								GWAS Pathway Identifier results
Geneset	No of genes	ES	NES	NominalP	FDR	FWER		Pathway id	Description	Method	No of SNPs	p-value
hsa05330	32	0.94	11.5	0	0	0		path:hsa05330_high	Allograft rejection	interaction, high	432	<=1.0E-06
hsa04612	59	0.941	6.685	0	0	0		path:hsa04612_low	Antigen processing and presentation	pathway	566	<=1.0E-06
hsa05310	25	0.955	6.236	0	0	0		path:hsa05310_high	Asthma	interaction, high	194	<=1.0E-06
hsa05320	46	0.916	7.351	0	0	0		path:hsa05320_high	Autoimmune thyroid disease	interaction, high	480	<=1.0E-06
hsa04514	110	0.773	17.905	0	0	0		path:hsa04514_high	Cell adhesion molecules (CAMs)	interaction, high	3362	<=1.0E-06
hsa04610	61	0.403	4.805	0	0	0		path:hsa04610_high	Complement and coagulation cascades	interaction, high	504	<=1.0E-06
hsa04512	78	0.504	6.847	0	0	0		path:hsa04512_high	ECM-receptor interaction	interaction, high	629	<=1.0E-06
hsa04510	173	0.501	11.595	0	0	0		path:hsa04510_high	Focal adhesion	interaction, high	2445	<=1.0E-06
hsa05332	31	0.938	12.417	0	0	0		path:hsa05332_high	Graft-versus-host disease	interaction, high	448	<=1.0E-06
hsa04640	70	0.568	10.969	0	0	0		path:hsa04640_high	Hematopoietic cell lineage	interaction, high	912	<=1.0E-06
hsa04650	103	0.729	19.01	0	0	0		path:hsa04650_high	Natural killer cell mediated cytotoxicity	interaction, high	1154	<=1.0E-06
hsa04330	35	0.629	6.169	0	0	0		path:hsa04330_low	Notch signaling pathway	pathway	619	<=1.0E-06
hsa05322	40	0.89	11.61	0	0	0		path:hsa05322_high	Systemic lupus erythematosus	interaction, high	777	<=1.0E-06
hsa04530	109	0.382	5.414	0	0	0		path:hsa04530_medium	Tight junction	interaction, medium	2528	<=1.0E-06
hsa04620	85	0.374	3.995	0	0	0.009		path:hsa04620_high	Toll-like receptor signaling pathway	characteristic interaction, high	2	<=1.0E-06
hsa04940	36	0.926	14.252	0	0	0		path:hsa04940_high	Type I diabetes mellitus	interaction, high	601	<=1.0E-06
								path:hsa04320_low	Dorso-ventral axis formation	pathway	621	<=1.0E-06
								path:hsa04144_low	Endocytosis	pathway	4107	<=1.0E-06
								path:hsa05169_high	Epstein-Barr virus infection	interaction, high	1763	<=1.0E-06
								path:hsa05168_high	Herpes simplex infection	interaction, high	1325	<=1.0E-06
								path:hsa05166_high	HTLV-I infection	interaction, high	1487	<=1.0E-06
								path:hsa05164_high	Influenza A	interaction, high	1196	<=1.0E-06
								path:hsa04672_high	Intestinal immune network for IgA production	interaction, high	582	<=1.0E-06
								path:hsa05134_low	Legionellosis	pathway	461	<=1.0E-06
								path:hsa05140_high	Leishmaniasis	interaction, high	762	<=1.0E-06
								path:hsa04010_low	MAPK signaling pathway	pathway	6202	<=1.0E-06
								path:hsa05162_low	Measles	pathway	2022	<=1.0E-06
								path:hsa04145_high	Phagosome	interaction, high	823	<=1.0E-06
								path:hsa04974_ultra	Protein digestion and absorption	interaction, ultra	221	<=1.0E-06
								path:hsa04141_low	Protein processing in endoplasmic reticulum	pathway	2713	<=1.0E-06
								path:hsa05323_high	Rheumatoid arthritis	interaction, high	739	<=1.0E-06
								path:hsa03040_low	Spliceosome	pathway	769	<=1.0E-06
								path:hsa05150_high	Staphylococcus aureus infection	interaction, high	312	<=1.0E-06
								path:hsa05145_high	Toxoplasmosis	interaction, high	1558	<=1.0E-06
								path:hsa05152_high	Tuberculosis	interaction, high	1178	<=1.0E-06
								path:hsa05203_high	Tumor viruses and cancer	interaction, high	1277	<=1.0E-06
								path:hsa05416_high	Viral myocarditis	interaction, high	495	<=1.0E-06
								path:hsa05100_high	Bacterial invasion of epithelial cells	interaction, high	640	0.0002
hsa05221	49	0.445	5.717	0	0	0		path:hsa05221_medium	Acute myeloid leukemia	interaction, medium	694	0.0004
hsa04630	136	0.483	11.838	0	0	0		path:hsa04630_low	Jak-STAT signaling pathway	pathway	2595	0.0004
								path:hsa00770_low	Pantothenate and CoA biosynthesis	characteristic	79	0.0004
								path:hsa05200_medium	Pathways in cancer	interaction, medium	5228	0.0004
hsa00650	31	0.419	2.777	0	0.003	0.219		path:hsa00650_low	Butanoate metabolism	characteristic	34	0.0006
								path:hsa04725_low	Cholinergic synapse	pathway	3450	0.0006
								path:hsa03013_medium	RNA transport	characteristic interaction, medium	222	0.0006
hsa04910	107	0.438	9.992	0	0	0		path:hsa04910_low	Insulin signaling pathway	pathway	2064	0.0008
hsa05222	80	0.445	7.065	0	0	0		path:hsa05222_high	Small cell lung cancer	interaction, high	529	0.0010002
								path:hsa04060_medium	Cytokine-cytokine receptor interaction	interaction, medium	3739	0.00120024
hsa04210	71	0.327	3.294	0	0.001	0.059		path:hsa04210_medium	Apoptosis	interaction, medium	976	0.00140028
hsa05214	55	0.403	4.802	0	0	0		path:hsa05214_medium	Glioma	interaction, medium	1118	0.00140028
								path:hsa04973_medium	Carbohydrate digestion and absorption	interaction, medium	658	0.00180036
								path:hsa04970_low	Salivary secretion	pathway	2990	0.00180036
hsa04020	149	0.447	7.211	0	0	0		path:hsa04020_low	Calcium signaling pathway	pathway	6157	0.00240048
								path:hsa04146_low	Peroxisome	pathway	1178	0.00260052
								path:hsa05202_low	Transcriptional misregulation in cancer	pathway	3720	0.00260052
hsa05215	77	0.437	7.324	0	0	0		path:hsa05215_low	Prostate cancer	pathway	1696	0.00280056
								path:hsa04380_low	Osteoclast differentiation	pathway	2570	0.0030006
								path:hsa00140_low	Steroid hormone biosynthesis	characteristic	51	0.00320064
								path:hsa05160_high	Hepatitis C	interaction, high	986	0.00360072
								path:hsa05414_low	Dilated cardiomyopathy	pathway	3143	0.00380076
								path:hsa05410_low	Hypertrophic cardiomyopathy (HCM)	pathway	2701	0.00460092
hsa04660	82	0.451	7.954	0	0	0		path:hsa04660_medium	T cell receptor signaling pathway	interaction, medium	1991	0.00620124
hsa05220	66	0.351	5.104	0	0	0		path:hsa05220_ultra	Chronic myeloid leukemia	interaction, ultra	148	0.00660132
								path:hsa03018_ultra	RNA degradation	interaction, ultra	527	0.00760152
hsa04360	110	0.527	6.949	0	0	0		path:hsa04360_medium	Axon guidance	characteristic interaction, medium	2880	0.00780156
								path:hsa05146_low	Amoebiasis	pathway	2462	0.00780156
								path:hsa04666_ultra	Fc gamma R-mediated phagocytosis	interaction, ultra	134	0.00780156
								path:hsa04971_low	Gastric acid secretion	pathway	2262	0.00780156
								path:hsa05014_low	Amyotrophic lateral sclerosis (ALS)	characteristic	90	0.00840168
hsa03440	25	0.28	1.234	0.021	0.082	0.998		path:hsa03440_medium	Homologous recombination	interaction, medium	103	0.00880176
								path:hsa04080_ultra	Neuroactive ligand-receptor interaction	interaction, ultra	1138	0.00920184
hsa04670	94	0.472	8.534	0	0	0		path:hsa04670_high	Leukocyte transendothelial migration	characteristic interaction, high	32	0.00980196
hsa04930	38	0.534	6.437	0	0	0		path:hsa04930_low	Type II diabetes mellitus	pathway	1178	0.010002
hsa04520	72	0.454	4.925	0	0	0		path:hsa04520_medium	Adherens junction	interaction, medium	1861	0.0108022
hsa04110	81	0.344	5.106	0	0	0		path:hsa04110_low	Cell cycle	characteristic	175	0.0110022
hsa04150	38	0.367	2.704	0	0.004	0.277		path:hsa04150_low	mTOR signaling pathway	pathway	1175	0.0110022
hsa05223	48	0.421	4.829	0	0	0		path:hsa05223_high	Non-small cell lung cancer	interaction, high	493	0.0110022
								path:hsa00785_low	Lipoic acid metabolism	pathway	19	0.0120024
								path:hsa04722_low	Neurotrophin signaling pathway	pathway	2102	0.0126025
								path:hsa05142_high	Chagas disease (American trypanosomiasis)	interaction, high	1045	0.0130026
								path:hsa05412_low	Arrhythmogenic right ventricular cardiomyopathy (ARVC)	pathway	3757	0.0132026
								path:hsa04726_low	Serotonergic synapse	characteristic	117	0.0138028
								path:hsa04260_low	Cardiac muscle contraction	pathway	1629	0.0146029
hsa04012	77	0.463	7.671	0	0	0		path:hsa04012_high	ErbB signaling pathway	interaction, high	1813	0.015203
								path:hsa00061_low	Fatty acid biosynthesis	pathway	109	0.015203
								path:hsa05031_low	Amphetamine addiction	pathway	2375	0.0176035
								path:hsa04972_low	Pancreatic secretion	pathway	2511	0.0176035
								path:hsa04614_ultra	Renin-angiotensin system	interaction, ultra	74	0.0194039
								path:hsa04270_low	Vascular smooth muscle contraction	pathway	3796	0.0196039
								path:hsa04744_low	Phototransduction	characteristic	23	0.019804
hsa05218	61	0.399	3.843	0.001	0	0.014		path:hsa05218_high	Melanoma	interaction, high	1511	0.0210042
hsa00500	60	0.436	7.446	0	0	0		path:hsa00500_high	Starch and sucrose metabolism	interaction, high	481	0.0214043
hsa00970	33	0.342	2.191	0	0.012	0.642		path:hsa00970_low	Aminoacyl-tRNA biosynthesis	characteristic	343	0.0228046
hsa04916	90	0.507	8.401	0	0	0		path:hsa04916_ultra	Melanogenesis	characteristic interaction, ultra	64	0.0228046
hsa00980	50	0.259	1.47	0.002	0.055	0.989		path:hsa00980_medium	Metabolism of xenobiotics by cytochrome P450	characteristic interaction, medium	6	0.0276055
hsa04912	82	0.49	8.386	0	0	0		path:hsa04912_low	GnRH signaling pathway	pathway	2650	0.0282056
hsa05212	66	0.369	5.329	0	0	0		path:hsa05212_high	Pancreatic cancer	interaction, high	814	0.0290058
hsa05130	39	0.632	7.295	0	0	0		path:hsa05130_low	Pathogenic Escherichia coli infection	pathway	712	0.0306061
hsa00830	46	0.366	2.051	0	0.017	0.741		path:hsa00830_ultra	Retinol metabolism	interaction, ultra	43	0.0308062
								path:hsa03015_low	mRNA surveillance pathway	pathway	1250	0.0314063
hsa03410	24	0.339	1.67	0.001	0.037	0.96		path:hsa03410_ultra	Base excision repair	interaction, ultra	39	0.0322064
hsa04662	50	0.387	3.878	0	0	0.014		path:hsa04662_medium	B cell receptor signaling pathway	interaction, medium	1061	0.0326065
								path:hsa03022_low	Basal transcription factors	pathway	299	0.0330066
								path:hsa04062_high	Chemokine signaling pathway	interaction, high	2366	0.0330066
								path:hsa00270_ultra	Cysteine and methionine metabolism	interaction, ultra	399	0.0336067
								path:hsa03460_low	Fanconi anemia pathway	characteristic	208	0.0338068
hsa04115	60	0.451	6.835	0	0	0		path:hsa04115_low	p53 signaling pathway	pathway	1235	0.034807
								path:hsa05143_low	African trypanosomiasis	pathway	782	0.0404081
hsa05213	47	0.471	5.503	0	0	0		path:hsa05213_high	Endometrial cancer	interaction, high	435	0.0406081
								path:hsa04961_low	Endocrine and other factor-regulated calcium reabsorption	pathway	1442	0.0410082
hsa05131	39	0.632	7.295	0	0	0		path:hsa05131_ultra	Shigellosis	interaction, ultra	165	0.0436087
hsa00052	22	0.528	3.285	0	0.001	0.063		path:hsa00052_medium	Galactose metabolism	interaction, medium	199	0.0458092
hsa04920	60	0.43	5.83	0	0	0		path:hsa04920_low	Adipocytokine signaling pathway	pathway	1258	0.0462092
								path:hsa04978_low	Mineral absorption	pathway	753	0.0476095
hsa05217	51	0.527	6.628	0	0	0		path:hsa05217_medium	Basal cell carcinoma	interaction, medium	746	0.0478096
								path:hsa04728_low	Dopaminergic synapse	pathway	3827	0.0486097
hsa05010	21	0.435	2.339	0.001	0.009	0.5		path:hsa05010_low	Alzheimer's disease	pathway	2524	0.0492098
hsa03010	48	0.343	2.736	0	0.004	0.25		path:hsa03010_medium	Ribosome	characteristic interaction, medium	33	0.0494099
hsa00010	49	0.443	3.517	0	0	0.027
hsa00030	23	0.422	1.998	0	0.018	0.781
hsa00051	24	0.581	5.567	0	0	0
hsa00120	30	0.429	2.09	0	0.015	0.709
hsa00190	76	0.356	2.823	0	0.003	0.192
hsa00220	25	0.489	2.728	0	0.004	0.254
hsa00230	119	0.384	7.667	0	0	0
hsa00240	64	0.326	3.142	0	0.001	0.092
hsa00280	39	0.417	3.956	0	0	0.01
hsa00310	33	0.402	3.087	0	0.002	0.111
hsa00330	28	0.448	3.157	0	0.001	0.091
hsa00340	35	0.42	2.909	0	0.002	0.158
hsa00350	43	0.449	5.054	0	0	0
hsa00380	47	0.403	4.171	0	0	0.003
hsa00450	25	0.489	4.171	0	0	0.003
hsa00510	36	0.439	4.054	0	0	0.007
hsa00561	44	0.522	6.748	0	0	0
hsa00562	41	0.416	4.197	0	0	0.003
hsa00564	53	0.508	7.92	0	0	0
hsa00565	27	0.507	4.089	0	0	0.006
hsa00600	30	0.43	3.312	0	0.001	0.057
hsa00620	35	0.366	2.54	0	0.006	0.37
hsa00790	33	0.34	2.196	0	0.012	0.638
hsa00983	34	0.398	2.279	0	0.01	0.552
hsa01030	99	0.476	6.553	0	0	0
hsa01031	48	0.345	3.267	0	0.001	0.067
hsa01430	120	0.481	11.252	0	0	0
hsa01510	34	0.447	4.162	0	0	0.004
hsa02010	41	0.755	11.433	0	0	0
hsa03022	27	0.515	3.85	0	0	0.014
hsa03420	37	0.4	2.557	0	0.006	0.359
hsa04070	65	0.477	6.316	0	0	0
hsa04120	110	0.402	9.949	0	0	0
hsa04310	132	0.443	7.916	0	0	0
hsa04340	50	0.517	6.572	0	0	0
hsa04350	78	0.464	7.09	0	0	0
hsa04370	60	0.387	5.483	0	0	0
hsa04540	78	0.535	7.7	0	0	0
hsa04664	66	0.457	8.113	0	0	0
hsa04720	59	0.521	5.708	0	0	0
hsa04730	69	0.522	7.535	0	0	0
hsa04742	35	0.468	5.402	0	0	0
hsa04810	171	0.365	7.631	0	0	0
hsa05110	52	0.35	4.14	0	0	0.004
hsa05120	58	0.421	5.263	0	0	0
hsa05210	78	0.451	6.135	0	0	0
hsa05211	63	0.449	6.417	0	0	0
hsa05340	28	0.855	5.837	0	0	0
hsa00071	38	0.361	1.955	0.001	0.02	0.817
hsa00640	29	0.441	3.399	0.001	0.001	0.043
hsa03030	26	0.295	1.61	0.001	0.042	0.971
hsa03320	60	0.321	2.965	0.001	0.002	0.141
hsa04140	23	0.375	1.91	0.001	0.022	0.851
hsa04950	20	0.485	3.051	0.001	0.002	0.117
hsa05040	27	0.368	1.694	0.001	0.036	0.953
hsa00982	53	0.243	1.262	0.002	0.078	0.997
hsa05219	34	0.369	2.831	0.002	0.003	0.188
hsa04130	25	0.41	2.48	0.003	0.006	0.412
hsa05216	28	0.437	2.922	0.003	0.002	0.156
hsa03430	21	0.345	1.511	0.004	0.051	0.987
hsa00252	31	0.296	1.409	0.005	0.061	0.995
hsa00512	26	0.494	2.362	0.007	0.008	0.481
hsa00260	31	0.302	1.363	0.009	0.065	0.996
hsa01032	20	0.369	1.3	0.01	0.073	0.997
hsa00590	42	0.241	1.166	0.011	0.091	1
hsa00020	26	0.31	1.364	0.013	0.066	0.996
hsa00910	23	0.37	1.947	0.014	0.02	0.823
hsa00860	29	0.302	1.194	0.016	0.088	0.999
hsa00480	33	0.235	1.408	0.024	0.061	0.995
hsa00591	24	0.273	1.169	0.026	0.092	1
hsa00760	20	0.442	2.029	0.035	0.017	0.753
hsa00150	37	0.299	1.534	0.044	0.049	0.981
hsa00530	26	0.284	0.844	0.083	0.17	1
hsa00410	20	0.366	1.013	0.137	0.123	1
hsa00251	28	0.269	0.823	0.155	0.176	1
